# Supplementary material for: A narrative synthesis of research evidence for tinnitus-related complaints as reported by patients and their significant others
Source: Health Qual Life Outcomes. 2018 Apr 11;16:61. doi: 10.1186/s12955-018-0888-9 (PMC5896078; doi:10.1186/s12955-018-0888-9)
Supplement: Supplementary file 5 — Complete dataset, including our domain coding and quality assessment. (XLSX 520 kb) [file 12955_2018_888_MOESM5_ESM.xlsx]

## Sheet: Dataset included records
	Age scoring = adequate (2) if the mean/median and standard deviation were reported; partial (1) if mean/median were reported with range; and poor (0) if mean/median, standard deviation or range is not reported	Gender scoring = (2) if male and female participants were included; and poor (0) if recruitment was limited to male or female participants only.	Sample size = adequate (2) if the authors provided justification for their sample size; partial (1) if poor justification was provided, or the sample used was underpowered; and poor (0) if no sample size was reported	Inclusion/Exclusion = (2) if no inclusion/exclusion criteria were reported; and (0) if any inclusion/exclusion criteria is specified in addition to any records in which criteria relating to identifying tinnitus as a symptom of a known otological condition which is the primary complaint or a generalised psychiatric condition.	QUALITY SUM (Q1)	Study title	Name of authors	Email of corresponding author	Country where study was conducted	Type of publication	If 'other' please specify	Date of publication	Timeframe (dates) of data collection	Aim of study	Study design	If 'other' please specify	Author stated type of study	Methods for collecting patient-reported complaints	If 'other' please specify	Type of questions used	Records were scored adequate (2) if only open questions were used; partial (1) if a combination of open and closed questions were used; and poor (0) if only closed questions were used	Specify all questionnaires used in separate cells	Tinnitus-specific questionnaires	General health	Sample size of tinnitus group	Study population	If 'other' please specify	Setting	Mean age	SD	Age range	Gender	Duration of tinnitus in yrs (SD)	Intermittent or constant	Pulsatile or non-pulsatile	Severity of tinnitus % in grades or Mean (SD)	Severity grading (No grading system/Complete grading scale/range of grading or grade (no SD))	other health-related co-morbidities - explicit inclusion criteria ONLY	Patient measures incl. interview questions used to obtain the domains	Patient measures	Tinnitus-related domains reported by patients in open questions	Interview domains	tinnitus-related domains identified by questionnaires and structured interviews	Questionnaire domains	Examples of domains (50% responses or top 3 scores for questionnaires)	Domains reported by significant others	Domains significant others	Significant other measures	Measures
1	2	2	0	2	6	Impact of tinnitus on the quality of life among Saudi patients	Alsanosi, AA.	sanosi@hotmail.com	Saudi Arabia	journal article		32(12); 2011	Jan 2008 - Dec 2010	To assess the impact of tinnitus on the quality of life of Saudi patients	non-interventional		Retrospective chart review	Questionnaire,		Closed	0	Tinnitus Handicap Inventory (THI) - Arabic translation	Tinnitus Handicap Inventory (Arabic)		100	Patients		secondary care services	47.1	13.1	not stated	Male and female	4.8 (2.9)	not stated	not stated	THI total male = 67.1 (11.5), women = 56.5 (15.4)	moderate - catastrophic	none stated	THI emotional subscale	Tinnitus Handicap Inventory (Arabic)			Emotional	Tinnitus-related distress	E6. Do you complain a great deal about your tinnitus? E22. Does your tinnitus make you feel anxious? E25. Does your tinnitus make you feel insecure?	N/A	N/A	N/A	N/A
																																							THI functional subscale	Tinnitus Handicap Inventory (Arabic)			Functional	Functional difficulties due to tinnitus	F2. Does the loudness of your tinnitus make it difficult for you to hear people?, F12. Does your tinnitus make it difficult for you to enjoy life?, F20. Because of your tinnitus, do you often feel tired?, F24. Does your tinnitus get worse when you are under stress?	N/A	N/A	N/A	N/A
																																							THI catastrophic subscale	Tinnitus Handicap Inventory (Arabic)			Catastrophic	Negative thoughts	C8. Do you feel as though you cannot escape your tinnitus?, C11. Because of your tinnitus, do you feel that you have a terrible disease?, C19. Do you feel that you have no control over your tinnitus?, C23. Do you feel that you can no longer cope with your tinnitus?	N/A	N/A	N/A	N/A
2	2	2	0	2	6	Longitudinal follow-up of tinnitus complaints	Andersson, G.; Vretblad, P.; Larsen, HC.; Lyttkens, L.	Gerhard.Andersson@psyk.uu.se	Sweden	journal article		2001-02-01	Jan 1988 - Mar 1995	To investigate the long-term outcome of patients with tinnitus, the long term effects of cognitive behavioural therapy and what properties of tinnitus predicts distress at follow-up	Other (please specify)		Longitundinal follow-up	Questionnaire,		Closed	0	Tinnitus Reaction Questionnaire (TRQ)	Tinnitus Reaction Questionnaire		146	Patients		secondary care services	56.4	13	22-83	Male and female	10.5 (12.5) (follow-up)	not stated	non-pulsatile	TRQ 34.5 (3.9)	no grading scale	none stated	TRQ - global score	Tinnitus Reaction Questionnaire			Tinnitus-related distress	Tinnitus-related distress	N/A	N/A	N/A	N/A	N/A
														To study the long-term outcome of tinnitus that had motivated specialist consultation				Questionnaire,		Closed		Questionnaire adapted from a structured interview protocol (not specified)	Author's own																Author's own questionnaire Q. 42	Author's own			psychological consequences	Tinnitus-related distress	irritation (88%), depression (76%), anxiety (61%), concentration difficulties (78%)	N/A	N/A	N/A	N/A
																																							Author's own questionnaire Q. 12	Author's own			Most problematic situation	Tinnitus-related distress	silence (75%), conversation or noise (47%), sleep (47%), stress (47%)	N/A	N/A	N/A	N/A
																																							Author's own questionnaire	Author's own			influence of background sounds or noises Q11	Concentration difficulties	yes/no	N/A	N/A	N/A	N/A
																																							Author's own questionnaire	Author's own			avoidance of situations because of tinnitus Q16	Difficulties coping	yes/no	N/A	N/A	N/A	N/A
																																							Author's own questionnaire Q. 17	Author's own			Sleep problems	Sleep difficulties	yes (62%)	N/A	N/A	N/A	N/A
3	2	2	0	2	6	Measuring subjective complaints of attention and performance failures - development and psychometric validation in tinnitus of the self-assessment scale APSA	Bankstahl, US.; Gortelmeyer, R.	ulli.bankstahl@merz.de	Germany	journal article		11; 2013	not stated	We aimed to develop a self-assessment questionnaire which would allow the scaling of cognitive failures and mishaps to serve as an outcome variable in a clinical developmental program in subjective tinnitus.	non-interventional		prospective multicultural non-interventional observational study	Questionnaire,		Closed	0	Attention and Performance self-assessment (APSA)		attention and performance self-assessment	211	Patients		secondary care services	48.5	8.3	30-60	Male and female	present at least 3 months, less than 1 year to more than 10 years	constant	non-pulsatile	THI-12 mean score = 11.2 (5.3) representing moderate handicap. THI-12 <6 = 36, 6 ≤ THI-12 <10 = 47, 10 ≤ THI-12 <14 = 63, THI-12 ≥14 = 63	moderate	none stated	Attention and Performance self-assessment (APSA)	attention and performance self-assessment			cognitive failures and mishaps	Cognitive difficulties	N/A	N/A	N/A	N/A	N/A
									Mexico									Questionnaire,		Closed		Tinnitus Handicap Inventory-12 (THI_12)	Tinnitus Handicap Inventory-12													The baseline mean for the TRS week version is 14.8 (N = 153, SD= 7.1) and for the month ver- sion 16.4 (N = 58, SD = 6.2).			Attention and Performance self-assessment (APSA20)	attention and performance self-assessment			attention and performance deficits	Concentration difficulties	N/A	N/A	N/A	N/A	N/A
									United States									Questionnaire,		Closed		Tinnitus rating scale (TRS)	Tinnitus Rating Scale																Attention and Performance self-assessment (APSA) - F1	attention and performance self-assessment			problems with prospective everyday memory including capacity-consuming monitoring;	Cognitive difficulties	Can't express/tip of tongue (mean 1.7), Sudden forgetfulness (mean 1.66), Make mistakes if low effort (mean 1.52)	N/A	N/A	N/A	N/A
																		Questionnaire,		Closed		Tinnitus severity scale (TSS)	Tinnitus Severity Scale																Attention and Performance self-assessment (APSA) - F2	attention and performance self-assessment			problems keeping attention focused, necessary to execute tasks in specific situations.	Concentration difficulties	Difficult follow conversation >1 talking (mean 2.05), Mind wandered (mean 1.7), Difficult follow conversation talking quickly (mean 1.64)	N/A	N/A	N/A	N/A
																		Questionnaire,		Closed		The Hospital anxiety and depression scale (HADs)		Hospital Anxiety and Depression scale															Tinnitus Handicap Inventory-12 (THI_12)	Tinnitus Handicap Inventory-12			emotional reaction, social actvities and communication, and focused attention	cannot code	items to assess tinnitus-related annoyance, anxiety, frustration, loss of control, tinnitus-related impairment of social life, job, and housekeeping activities.	N/A	N/A	N/A	N/A
																																							Tinnitus rating scale (TRS)	Tinnitus Rating Scale			tinnitus loudness/strength, annoyance, impact on life and severity	cannot code	N/A	N/A	N/A	N/A	N/A
																																							Tinnitus severity scale (TSS)	Tinnitus Severity Scale			tinnitus annoyance	Annoyance	N/A	N/A	N/A	N/A	N/A
																																											impact on life	Health-related quality of life	N/A	N/A	N/A	N/A	N/A
																																											severity	cannot code	N/A	N/A	N/A	N/A	N/A
4	1	2	0	2	5	Minnesota Multiphasic Personality Inventory profile of patients with subjective tinnitus	Bayar,N.; Oguzturk, O.; Koc, C.	not stated	Turkey	journal article		31 (5); 2002	not stated	To investigate the psychological effects of tinnitus by using the Minnesota Multiphasic Personality Inventory (MMPI)	non-interventional		not stated	Questionnaire,		Closed	0	Minnesota Multiphasic Personality Inventory (MMPI) (Turkish version)		minnesota multiphasic personality Inventory (Turkish)	28	Patients		secondary care services	42	not stated	15-50	Male and female	1-20 yrs	not stated	not stated	subjective tinnitus severity levels 0-10 Male L: 5.62 (1.92) R: 2.50 (3.09) Female L: 4.83 (3.76) R: 4.83 (2.69)	no grading scale	none stated	Author developed questionnaire based on american tinnitus association questionnaire	Author's own			Sleep problems	Sleep difficulties	Sleep problems owing to tinnitus were present in both male and female groups. Males: Five (31.25%) had trouble sleeping, three (18.75%) sometimes, one (6.25%) often, one (6.25%) always. Females: Five (41.4%) had trouble sleeping, three (25.0%) sometimes, one (8.2%) often, one (8.2%) always.	N/A	N/A	N/A	N/A
																		Other (please specify)	Numerical rating scale (10-points)	Closed		Subjective tinnitus loudness (10-point scale)	Patient-reported numerical rating scales tinnitus loudness																Author developed questionnaire based on american tinnitus association questionnaire	Author's own			effects of tinnitus on work activities	Negative impact on work activities	inability to work or difficulty concentrating during work (33.8% males)	N/A	N/A	N/A	N/A
																		Questionnaire,		Closed		Author developed questionnaire based on American Tinnitus Association questionnaire	Author's own																Author developed questionnaire based on american tinnitus association questionnaire	Author's own			effects of tinnitus on social activities	Negative impact on social life	(33.3% males/ 16.6% females)	N/A	N/A	N/A	N/A
																																							Author developed questionnaire based on american tinnitus association questionnaire	Author's own			effects of tinnitus on mental activities	Concentration difficulties	(38.8% males/ 50.0% females)	N/A	N/A	N/A	N/A
																																							Author developed questionnaire based on american tinnitus association questionnaire	Author's own			Overall enjoyment of life	Health-related quality of life	(38.8% males/ 50.0% females)	N/A	N/A	N/A	N/A
5	2	2	0	2	6	Questionnaires to evaluate anxiety and depressive levels in tinnitus patients	Crocetti, A.; Forti, S.; Ambrosetti, U.; Del Bo, Luca.	aut_est@yahoo.it	Italy	journal article		2009-03-01	not stated	The aim of this study was to evaluate the correlation between the most common instruments used to quantify tinnitus (THI and VAS) and the level of anxiety (STAI-T8,9) and depression (BDI10-12) experienced by patients in order to provide a guideline for otolaryngologists.	non-interventional		cross-sectional survey	Questionnaire		Closed	0	Tinnitus Handicap Inventory (THI)	Tinnitus Handicap Inventory		108	Patients		secondary care services	48	13.36	19-85	Male and Female	> 6 months	not stated	not stated	THI: 39.76 (+/- 23.497) - moderate grade of tinnitus	mild - severe	none stated	Beck Depression Inventory (BDI) - Italian version	Beck Depression Inventory (Italian)			Depression,	Depressive symptoms	The mean BDI score was 9.97 ( 8.177), which corresponds to depressive symptoms of a moderate degree. Furthermore, 12.96 percent reported symptoms of depressive syndrome. the mean BDI score among patients with THI 38 was 6.17 ( 7.289), and the differences were statistically significant (U 501.5, P 0.001).	N/A	N/A	N/A	N/A
								delbo@sordita.it										Other (please specify)	Visual Analogue Scale (VAS),	Closed		Visual Analogue Scale (VAS)	Patient-reported numerical rating/visual analogue scales													VAS: effects on life - 5.00 (+/- 3.001), intensity - 5.91 (+/-2.386), annoyance - 5.94 (+/- 2.528), overall problems - 5.36 (+/- 2.953)			State Trait Anxiety Inventory Form Y (STAI-T) - Italian version	State Trait Anxiety Inventory (Italian)			Anxiety,	Anxiety	The mean STAI-T score was 43.41 ( 11.470), and 35.19 percent of the samples showed anxiety symptoms that should be treated. In particular, it was thought that persons with at least moderate tinnitus (THI 38) would have more important anxiety symptoms (mean STAI-T score was 48.84 11.028). Instead, we found this score to be 38.72 ( 9.706) for patients with THI 38, and the differences were statistic…	N/A	N/A	N/A	N/A
																		Questionnaire,		Closed		State Trait Anxiety Inventory Form Y (STAI-T) - Italian version		State Trait Anxiety Inventory (Italian)															Tinnitus Handicap Inventory (THI)	Tinnitus Handicap Inventory			impact of tinnitus on daily life,	Quality of life (tinnitus)	The mean THI score was 39.76 ( 23.497), which corresponds to moderate degrees of tinnitus. strong correlation resulted between THI scores and presence of anxiety/depression symptoms. The THI questionnaire is a good predictor of patients with high levels of depression and anxiety. If a patient reports a THI greater than 38, the otolaryngologist should investigate the diagnosis in greater depth wit…	N/A	N/A	N/A	N/A
																		Questionnaire,		Closed		Beck Depression Inventory (BDI) - Italian version		Beck Depression Inventory (Italian)															Visual Analogue Scale (VAS)	Patient-reported numerical rating/visual analogue scales			effects on life,	Health-related quality of life	The mean VAS scores were: 5.00 ( 3.001) effects on life,	N/A	N/A	N/A	N/A
																																							Visual Analogue Scale (VAS)	Patient-reported numerical rating/visual analogue scales			annoyance/discomfort,	Annoyance	The mean VAS scores were: 5.94 ( 2.528) annoyance	N/A	N/A	N/A	N/A
																																							Visual Analogue Scale (VAS)	Patient-reported numerical rating/visual analogue scales			the extent of problems due to tinnitus,	cannot code	The mean VAS scores were: 5.36 ( 2.953) overall problems.	N/A	N/A	N/A	N/A
																																							Visual Analogue Scale (VAS)	Patient-reported numerical rating/visual analogue scales			Intensity of tinnitus	Tinnitus loudness	The mean VAS scores were: 5.91 ( 2.386) intensity,	N/A	N/A	N/A	N/A
6	2	2	0	2	6	Audiological and psychological characteristics of a group of tinnitus sufferers, prior to tinnitus management training	Dineen, R.; Doyle, J.; Bench, J.	not stated	Australia	journal article		31; 1997	not stated	The present paper presents the results of the first stage of this programme, namely, a profile o the audiological and psychological characteristic of 96 individual attending for assintence in tinnitus management).	non-interventional		not stated	Questionnaire,		Closed	0	History questionnaire (32 items)	History questionnaire		96	patients		general public	53.57	15	21-87	Male and female	11.94	both	not stated	TRQ = 26.9 (SD: 22.52, range: 0-89)	no grading scale	none stated	History questionnaire	History questionnaire			Awareness - most aware when	Tinnitus awareness	resting (38), trying to sleep (32), concentrating (16), working (1), listening to music (9)	N/A	N/A	N/A	N/A
																		Questionnaire,		Closed		The revised Ways of Coping Check List (WCCL-R) (Vitaliano et al., 1985)		revised Ways of Coping Check List															History questionnaire	History questionnaire			problems getting to sleep	Sleep difficulties	Only 37 said yes. subjects who reported problems getting to sleep (37) found their tinnitus to be louder (p<0.0001), more annoying (p<0.0001), more difficult to cope with (p<0.001) and reported a greater level of reaction to the tinnitus (p<0.0001). Alos reported signifncatly greater levels of stress, anxiety and depression.	N/A	N/A	N/A	N/A
																		Questionnaire,		Closed		The Derogatis Stress Profile (DSP) (Derogatis, 1987)		Derogatis Stress Profile															History questionnaire	History questionnaire			waking during night	Sleep difficulties	Only 13 said yes. Subjects who reported their tinnitus woke then during the night (13) found their tinntius to be louder, more annoying, more difficult to cope with and higher levels of reaction to tinnitus.	N/A	N/A	N/A	N/A
																		Questionnaire,		Closed		The Tinnitus Reaction Questionnaire (TRQ) (Wilson et al., 1991)	Tinnitus Reaction Questionnaire																History questionnaire	History questionnaire			Aggravated by noise	cannot code	yes = 20, no = 76	N/A	N/A	N/A	N/A
																		Other (please specify)	Numerical rating scale (10-points)	Closed		10 - point visual analogue scales (VAS) for tinnitus loudness, tinnitus annoyance and general coping ability (Kirsch et al., 1989)	Patient-reported numerical rating scales tinnitus loudness																10 - point visual analogue scales (VAS)	Patient-reported numerical rating scales annoyance			Annoying	Annoyance	subjects tended to report tinnitus that was perceived as moderately loud and annoying	N/A	N/A	N/A	N/A
																		Other (please specify)	Numerical rating scale (10-points)	Closed		10 - point visual analogue scales (VAS) for tinnitus loudness, tinnitus annoyance and general coping ability (Kirsch et al., 1989)	Patient-reported numerical rating scales annoyance																10 - point visual analogue scales (VAS)	Patient-reported numerical rating scales general coping ability			Coping	Difficulties coping	high a ability to cope, the most frequently reported coping strategies were those aimed at regulating the levels of emotional reaction to the tinnitus	N/A	N/A	N/A	N/A
																		Other (please specify)	Numerical rating scale (10-points)	Closed		10 - point visual analogue scales (VAS) for tinnitus loudness, tinnitus annoyance and general coping ability (Kirsch et al., 1989)	Patient-reported numerical rating scales general coping ability																10 - point visual analogue scales (VAS)	Patient-reported numerical rating scales tinnitus loudness			Loudness	Tinnitus loudness	subjects tended to report tinnitus that was perceived as moderately loud and annoying	N/A	N/A	N/A	N/A
																																							The Tinnitus Reaction Questionnaire (TRQ)	Tinnitus Reaction Questionnaire			Reaction to tinnitus	Tinnitus-related distress	26.90 (22.52)	N/A	N/A	N/A	N/A
																																							The Derogatis Stress Profile (DSP)	Derogatis Stress Profile			Stress	General distress	121.92 (28.62) subjects tended to report moderate levels of stress in their lives	N/A	N/A	N/A	N/A
																																							The Derogatis Stress Profile (DSP)	Derogatis Stress Profile			Depression	Depressive symptoms	8.72 (4.37)	N/A	N/A	N/A	N/A
																																							The Derogatis Stress Profile (DSP)	Derogatis Stress Profile			Anxiety	Anxiety	12.74 (5.37)	N/A	N/A	N/A	N/A
																																							The Derogatis Stress Profile (DSP)	Derogatis Stress Profile			Relax	cannot code	12.13 (4.19)	N/A	N/A	N/A	N/A
7	1	2	0	2	5	A questionnaire study of the quality of life and quality of family life of individuals complaining of tinnitus pre- and post-attendance at a tinnitus clinic	El Refaie, A.; Davis, A.; Kayan, A.; Baskill, J.; Lovell, E.; Owen, V.	Amr.Elrefaie@phnt.swest.nhs.uk	United Kingdom	journal article		43; 2004	not stated	1. How do the characteristics of tinnitus, its severity and its effect on various aspects of individuals’ lives change as a result of attendance at a tinnitus clinic? 2. What is the effect of treatment on individuals’ QoL? 3. Does attendance at the clinic result in a change in QoFL?	Invention studies	some patients did receive an intervention such as received an hearing aid	not stated	Questionnaire,		Not known	0	Author-developed tinnitus questionnaire (8 items) - duration of tinnitus, the nature of the complaint,the site of tinnitus, severity of tinnitus, use of hearing aids and/or tinnitus retrainers or noise generators, and the possible effects of tinnitus on patients’ lives (functional and social handicap)	Author's own		57	Patients and significant others		secondary care services	62	not stated	not stated	Male and female	median = 4.5	both	not stated	not stated	not stated	none stated	author developed tinnitus questionnaire	Author's own			Functional Handicap caused by tinnitus	cannot code	annoyance, sleeplessness, tension, anxiety (about its cause), anxiety about its future. The mean functional handicap score in the pre-clinic condition (42%) was significantly greater than the mean score after attendance at the clinic (29%; t 5.7, p 0.01).	Day to day activities with the Tinnitus sufferer	Negative impact on activities	QoFL (completed by family of person with tinnitus)	The Quality of Family Life questionnaire
																		Questionnaire,		Closed		The Short Form-36 Health Survey (SF-36)		Short Form-36 Health Survey	57 partners														author developed tinnitus questionnaire	Author's own			Social Handicap	Quality of life (tinnitus)	i.e. how tinnitus affects the day-to-day life of the individual. concentration, listening to people, social activities, household activites, enjoying life, attending to people and tasks. The mean percentage social handicap score in the pre-clinic condition was 46%, compared to 38% postclinic.	Effects of tinnitus on the sufferer	cannot code	QoFL (completed by family of person with tinnitus)	The Quality of Family Life questionnaire
																		Questionnaire,		Closed		The Quality of Family Life questionnaire (QoFL questionnaire)		Quality of Family Life questionnaire															not known	Author's own			Annoyance	Annoyance	30 individuals (53%) complained of severe annoyance initially and 20 (35%) after attending the clinic.	Effects of tinnitus on the family	Negative impact on relationships	QoFL (completed by family of person with tinnitus)	The Quality of Family Life questionnaire
																		Questionnaire,		Closed		The Short Form -6D VAS Health unility measure overall QOL		Short Form-36 Health Survey															author developed tinnitus questionnaire	Author's own			Presence or awareness of tinnitus	Tinnitus awareness	N/A	Coping with day to day activites	Difficulties coping	QoFL (completed by family of person with tinnitus)	The Quality of Family Life questionnaire
																																							The Short Form-36 Health Survey (SF-36)/SF-6D	Short Form-36 Health Survey			Quality of life	Health-related quality of life	Physical Functioning (M: 68.1), Role - Physical (M: 63.2), Bodily Pain (M: 59.9), General Health (M: 53.6), Vitality (M: 46.7), Social functioning (M: 70.1), Role Emotional (M: 65.4), Mental Health (M: 61.1)	understanding of tinnitus	Knowledge/understanding of tinnitus	QoFL (completed by family of person with tinnitus)	The Quality of Family Life questionnaire
																																													N/A	Restrictions of activites	Negative impact on activities	QoFL (completed by family of person with tinnitus)	The Quality of Family Life questionnaire
																																													N/A	changes in family life	Negative impact on relationships	QoFL (completed by family of person with tinnitus)	The Quality of Family Life questionnaire
8	2	2	0	2	6	Psychological and audiological correlates of perceived tinnitus severity	Erlandsson, SI.; Hallberg LRM.; Axelsson A.	not stated	Sweden	journal article		31; 1992	not stated	The main purpose of this study was to examine the relationship between tinnitus severity and perceived attitudes, social support and disability/handicap.	non-interventional		not stated	Questionnaire,		Closed	0	Tinnitus Severity Questionnaire (TSQ) - 10 item (Axelsson, Cole, Hazell & Lutman, 1989)	Tinnitus Severity Questionnaire		163	Patients		secondary care services	59.7	13.5	21-89	Male and female	10.4 (median: 7 yrs)	not stated	not stated	TSQ = 29.2 (SD: 7.7, range 10-45)	no grading scale	none stated	Tinnitus Severity Questionnaire (TSQ)	Tinnitus Severity Questionnaire			sleep	Sleep difficulties	problems with sleep were reported by 35% of 127 patients who answered	N/A	N/A	N/A	N/A
																				Not known		Author developed questionnaire on demographic data/descriptives		author's own															Tinnitus Severity Questionnaire (TSQ)	Tinnitus Severity Questionnaire			negative impact on quality of life	Quality of life (tinnitus)	"How much life quality was reduced by tinnitus?" (mean: 3,4) showed that tinnitus in general had a moderately negative impact on life	N/A	N/A	N/A	N/A
																		Questionnaire,		Closed		Tinnitus Handicap/Support Scale (THS-scale)	Tinnitus Handicap/Support Scale																Tinnitus Severity Questionnaire (TSQ)	Tinnitus Severity Questionnaire			Notice tinnitus	Tinnitus awareness	N/A	N/A	N/A	N/A	N/A
																																							Tinnitus Severity Questionnaire (TSQ)	Tinnitus Severity Questionnaire			Masking effects	cannot code	N/A	N/A	N/A	N/A	N/A
																																							Tinnitus Severity Questionnaire (TSQ)	Tinnitus Severity Questionnaire			Irritability	Irritable	N/A	N/A	N/A	N/A	N/A
																																							Tinnitus Severity Questionnaire (TSQ)	Tinnitus Severity Questionnaire			Depressive reactions	Depressive symptoms	N/A	N/A	N/A	N/A	N/A
																																							Author developed questionnaire on demographic data/descriptives	Author's own			Psychosomatic	Bodily complaints	The frequency of headaches was clearly correlated with the majority of items in the questionnaire; also vertigo and hypersensitive to sounds were more often present in patients with high vaues on the TSQ	N/A	N/A	N/A	N/A
																																							Tinnitus Handicap/Support Scale (THS-scale)	Tinnitus Handicap/Support Scale			Perceived attitudes	Lack of support from family and friends	"People around me become nervous", "People treat me different", "family gets aggravated with me", People get annoyed with me"	N/A	N/A	N/A	N/A
																																							Tinnitus Handicap/Support Scale (THS-scale)	Tinnitus Handicap/Support Scale			Social Support	Lack of support from family and friends	"family shows me that they care", "Family is concerned about tinnitus", " family understands my troubles"	N/A	N/A	N/A	N/A
																																							Tinnitus Handicap/Support Scale (THS-scale)	Tinnitus Handicap/Support Scale			Disability/handicap	Quality of life (tinnitus)	" There are things I would like to do", "I am left out of certain activities", "Tinnitus constantly interferes", "tinnitus affects functioning at home"	N/A	N/A	N/A	N/A
9	2	2	0	0	4	Characterization of tinnitus in the elderly and its possible related disorders	Ferreira, LM.; Ramos Júnior, AN.; Mendes, EP.	not stated	Brazil	journal article		March/April 2009	June 06 - Dec 06	to study the epidemiology of elderly persons with tinnitus seen at a tertiary hosptial; to characterise tinnitus in the elderly patients; to correlate existing comorbidities in elderly patients with tinnitus; to identify audiometric findings in elderly patients with tinnitus and to quantify the effect of tinnitus on the lives of elderly persons.	non-interventional		cross-sectional, descriptive, quantitative study	Questionnaire,		Closed	0	Standard questionnaire adapted from Sanchez	Author's own		100	Patients		secondary care services	68.77 (F); 70.72 (M)	6.55 (F); 8.21 (M)	60 - 88 (F); 60 - 90 (M)	Male and female	recent 62%; Mid - term=21%; Long term=21%	both	both	VAS scale: mild 26%; Moderate 39%; Intense 35%	Complete grading scale	none stated	Standard questionnaire adapted from Sanchez	Author's own			effect of tinnitus on daily lives/repercussion on the lives of elderly patients	Quality of life (tinnitus)	interferes with sleep, interferes with concentration, interferes emotionally, interferes with social life	N/A	N/A	N/A	N/A
10	1	2	0	0	3	Is the Degree of Discomfort Caused by Tinnitus in Normal-Hearing Individuals Correlated with Psychiatric Disorders?	Granjeiro, RC.; Kehrle, HM.; Cardoso de Oliveira, TS.; Sampaio, AL.; Costa Pires de Oliveira, CA.	ronaldogranjeiro@terra.com.br	Brazil	journal article		2013-04-01	Nov 2008 - Nov 2010	To evaluate the annoyance of tinnitus in normal hearing patients and to correlate it with outer hair cell function and with anxiety and depression disorders.	non-interventional		case control study	Questionnaire,		Closed	0	Tinnitus Handicap Inventory	Tinnitus Handicap Inventory		68	Patients		secondary care services	36.8		inclusion criteria was age range 20-45 years	Male and female	5.95 (6.7)	not stated	not stated	not stated		none stated	Tinnitus Handicap Inventory	Tinnitus Handicap Inventory			annoyance of tinnitus	Annoyance	N/A	N/A	N/A	N/A	N/A
																		Questionnaire,		Closed		Beck Anxiety Inventory		Beck Anxiety Inventory															Tinnitus Handicap Inventory	Tinnitus Handicap Inventory			discomfort of tinnitus	Annoyance	N/A	N/A	N/A	N/A	N/A
																		Questionnaire,		Closed		Beck Depression Inventory		Beck Depression Inventory																					N/A	N/A	N/A	N/A	N/A
11	2	2	0	2	6	Adult attachment, perceived family support, and problems experienced by tinnitus patients	Granqvist, P.; Lantto, S.; Ortiz, L.; Andersson G.	gerhard.andersson@psyk.uu.se	Sweden	journal article		2001 vol.16	1988 - 1995	To examine associations of adult attachment in relation to tinnitus-related problems and perceived support from family members.	Other (please specify)	A follow-up after a previous follow-up after routine psychological treatment	"follow up"	Questionnaire,		Closed	0	Tinnitus Reaction Questionnaire (Wilson 1991)	Tinnitus Reaction Questionnaire		102	Patients		secondary care services	58	10.7	27-79	Male and female	10.5	not stated	not stated	TRQ = 35.7 (23.1)	no grading scale	none stated	Tinnitus Reaction Questionnaire - global score	Tinnitus Reaction Questionnaire			Distress caused by tinnitus	Tinnitus-related distress	My tinnitus has made me unhappy; my tinnitus has made it hard for me to relax; my tinnitus has made it hard for me to concentrate	N/A	N/A	N/A	N/A
																		Questionnaire,		Closed		Hearing Coping Assessment (Andersson 1995)		Hearing Coping Assessment		Patients										Klockhoff and Lindblom (1967) grades were used to categorise the participants, 3% were grade 1, 61% were grade 2, 36% were grade 3.	Complete grading scale		Adult Attachment Scale - Security subscale	Adult Attachment Scale			Insecurity of attachment (ambivalence)	Negative impact on relationships	I find others are reluctant to get as close as I would like	N/A	N/A	N/A	N/A
																		Questionnaire,		Closed		Family Support Scale of the West Haven-Yale Multidimensional Pain Inventory (Kerns 1985)		Family Support Scale of the West Haven-Yale Multidimensional Pain Inventory		Patients													Adult Attachment Scale - Avoidance subscale	Adult Attachment Scale			Insecurity of attachment (avoidance)	Negative impact on relationships	I find it difficult to allow myself to depend on others	N/A	N/A	N/A	N/A
																		Questionnaire,		Closed		Adult Attachment Scale (Collins and Read 1990)		Adult Attachment Scale		Patients																			N/A	N/A	N/A	N/A	N/A
12	1	2	0	2	5	Cognitive variables in tinnitus annoyance	Hallam, R. S.; Jakes, SC.; Hinchcliffe, R.	not stated	United Kingdom	journal article		1988, vol. 27		to devise two new questionnaires to investigate dimensions of complaint about tinnitus	non-interventional			Questionnaire,		Closed	0	Authors' own questionnaire (version 1)		author's own	79	Patients		secondary care services	49.2	not stated	X -76	Male and female	5.1 (range: 1-43y)	not stated	not stated	not stated	not stated	none stated	Authors' own questionnaire (version 1)	Author's own			Emotional distress	Worries/concerns	"I worry that there is something seriously wrong with my body"	N/ A	N/A	N/ A	N/A
																																							Authors' own questionnaire (version 1)	Author's own			Auditory perceptual difficulties	Negative effects on hearing	eg "I have more difficulty in telling where sounds are coming"	N/A	N/A	N/A	N/A
																																											Sleep disturbance	Sleep difficulties	"I wake up more in the night"	N/A	N/A	N/A	N/A
	1	2	0	2	5	Study 2												Questionnaire,		Closed	0	Authors' own questionnaire (version 2)		author's own	100	Patients		secondary care services	53.9	not stated	18-76	Male and female	6.8	not stated	not stated	not stated	not stated	none stated	Authors' own questionnaire (version 2)	Author's own			Emotional distress	Tinnitus-related distress	a) loudness, unpleasantness of the noises; b) worries about the persistence of the noises; c) emotional effects (irritability, anger, sadness)	N/A	N/A	N/A	N/A
																																							Authors' own questionnaire (version 2)	Author's own			Auditory perceptual difficulties	Negative effects on hearing	eg "I have more difficulty in telling where sounds are coming"	N/A	N/A	N/A	N/A
																																							Authors' own questionnaire (version 2)	Author's own			Sleep disturbance	Sleep difficulties	problems in getting to sleep, waking in the night, waking early	N/A	N/A	N/A	N/A
13	2	2	0	0	4	Chronic tinnitus: association with psychiatric diagnoses	Harrop-Griffiths, J.; Katon, W.; Dobie, R.; Sakai, C.; Russo, J.	not stated	United States	journal article		31 (5); 1987	not stated	1. to determine the prevelence of psychiatric illness in tinnitus patients as compared with controls using a structured psychiatric interview and operational diagnostic criteria. 2 to determine the number and types of psychosocial problems present in tinnitus patients as compared with controls	non-interventional			Questionnaire,	Structured interview	Open and closed	1	NIMH DIS which uses the American Diagnostic and Statistical Manual (DSM III) criteria		Structured psychatric interview	21	Patients		secondary care services	49	3.3	not stated	Male and female	7.7 (2.19, range: 1 mth - 37 yrs)	not stated	not stated	stated as severe but no detail of what measures were used to assess this	no measure	none stated	National Institute of Mental Health Diagnostic Interview Schedule which uses the American Diagnostic and Statistical Manual (DSM III) criteria	National Institute of Mental Health Diagnostic Interview Schedule	Depression	Depression			Thirteen (62%) of tinnitus group had one or more major depressions in their lifetime compared to three (21%) of the control group. Seven (70%) of current depression placed onset in same year as the onset of tinnitus. Lifetime major depression, Current major depression.	N/A	N/A	N/A	N/A
																		Questionnaire,		Closed		Hopkins Symptom Checklist (SCL-90)		Symptom Checklist															National Institute of Mental Health Diagnostic Interview Schedule which uses the American Diagnostic and Statistical Manual (DSM III) criteria	National Institute of Mental Health Diagnostic Interview Schedule	somatic symptoms	Bodily complaints			The significant increase in somatic symptoms in the patients with tinnitus is explained by the increased prevalence of major depression in tinnitus patients	N/A	N/A	N/A	N/A
																		Questionnaire,		Closed		Chronic illness Problem Inventory		Chronic illness Problem Inventory															Hopkins Symptom Checklist (SCL-90)	Symptom Checklist			somatisation	Distress from bodily complaints	Somatization (SOM) scores on SCL-90 (Reflects distress arising from perceptions of bodily dysfunction. Complaints focus on cardiovascular, gastrointestinal, respiratory, neurological and other systems with strong autonomic mediation. Pain and discomfort of the gross musculature and other somatic equivalents of anxiety are also possible components of Somatization).	N/A	N/A	N/A	N/A
																																							Chronic Illness Problem Inventory	Chronic illness Problem Inventory			sleep problems	Sleep difficulties	The tinnitus patients reported a significantly greater number of problems on the Chronic Illness Problem Inventory than the control group 6.8 vs 2.6 r(32.3) = 3.3; p < 0.002 (Table VI). More specifically they reported significantly more severe problems with: sleep [t(25.3) = 3.2; p < 0.0041; cognitive difficulties [t(22.1) = 3.1; p < 0.005); sexual difficulties It(26.9) = 3.5; p < 0.0021; contact…	N/A	N/A	N/A	N/A
																																							Chronic Illness Problem Inventory	Chronic illness Problem Inventory			cognitive difficulties	Cognitive difficulties	N/A	N/A	N/A	N/A	N/A
																																							Chronic Illness Problem Inventory	Chronic illness Problem Inventory			sexual problems	Sexual difficulties	N/A	N/A	N/A	N/A	N/A
																																							Chronic Illness Problem Inventory	Chronic illness Problem Inventory			contact with family and friends	Lack of support from family and friends	N/A	N/A	N/A	N/A	N/A
																																							Chronic Illness Problem Inventory	Chronic illness Problem Inventory			Medical interaction	cannot code	N/A	N/A	N/A	N/A	N/A
																																							Chronic Illness Problem Inventory	Chronic illness Problem Inventory			illness focusing	cannot code	N/A	N/A	N/A	N/A	N/A
																																							Chronic Illness Problem Inventory	Chronic illness Problem Inventory			marital difficulty	Negative impact on relationships	marital difficulties which were of a more severe nature in the tinnitus. non-depressed group than controls (t(2.7) = 2.1:p < 0.045].	N/A	N/A	N/A	N/A
14	2	2	0	2	6	Polysomnographic and quantitative electroencephalographic correlates of subjective sleep complaints in chronic tinnitus	Hebert, S.; Fullum, S.; Carrier, J.	sylvie.hebert@umontreal.ca	Canada	journal article		20; 2011	not stated	to assess the sleep quality of tinnitus subjects by examining both subjective and objective sleep characteristics within the same group of participants and by avoiding the confound of selecting only subjects with sleep disorders.	non-interventional		Prospective, matched control study	Questionnaire,		Closed	0	Pittsburgh Sleep Quality Index (PSQI- 19 items) - French version		Pittsburgh Sleep Quality Index (French)	22	Patients		secondary care services	62.5	6.7	not stated	Male and female	10.8 (range: 1.5-42 years)	not stated	not stated	TRQ = 15.6	no grading scale	none stated	Pittsburgh Sleep Quality Index - French version	Pittsburgh Sleep Quality Index (French)			sleep	Sleep difficulties	ti group showed poorer self assessment on sleep efficiency, percieved sleep quality and daily disturbances	N/A	N/A	N/A	N/A
																		Other (please specify)	diary/visual analogue scale	Closed		Pittsburgh sleep diary - French version (contains VAS)		Pittsburgh sleep diary (French)				general public											State Trait Anxiety Questionnaire (ASTA)	State Trait Anxiety Inventory			Anxiety	Anxiety	tinnitus subjects were more anxious (anxiety trait: (t(40) –2.29, P < 0.05).	N/A	N/A	N/A	N/A
																		Questionnaire,		Closed		Beck Depression Inventory-II		Beck Depression Inventory															Pittsburgh sleep diary - French version (contains VAS)	Pittsburgh sleep diary (French)			sleep	Sleep difficulties	the tinnitus group reported shorter sleep quality and poorer vigilance at wake time than the control group	N/A	N/A	N/A	N/A
																		Questionnaire,		Closed		Tinnitus Reaction Questionnaire - French version	Tinnitus Reaction Questionnaire (French)																Tinnitus Reaction Question - French version	Tinnitus Reaction Questionnaire			tinnitus-related distress	Tinnitus-related distress	N/A	N/A	N/A	N/A	N/A
15	0	0	0	2	2	Development of the psychological impact of tinnitus interview: A clinician-administered measure of tinnitus-related distress	Henry JL.; Kangas, M.; Wilson, PH.	J.Henry@unsw.edu.au	Australia	journal article		7(1); 2001	not stated	develop an interview assessment of psychological distress related to tinnitus and to conduct some initial evaluations of its usefulness in the context of a treatment outcome study of the effects of cognitive behavior therapy	non-interventional		not stated	Questionnaire,	structured interview	Open	1	Psychological Impact of Tinnitus Interview (PITI)	Psychological Impact of Tinnitus Interview		126	Patients		general public	not stated	not stated	not stated	not reported	> 6months	not stated	not stated	TRQ >17	no grading scale	none stated	How do you feel when you awake with loud tinnitus?	Psychological Impact of Tinnitus Interview	difficulties experienced related to sleep	Sleep difficulties			My tinnitus is louder when I first awake and this upsets me	N/A	N/A	N/A	N/A
															Invention studies			Questionnaire,		Closed		Tinnitus Reaction Questionnaire (TRQ)	Tinnitus Reaction Questionnaire																How has your tinnitus been in the last couple of weeks? In general , how has your tinnitus affected you in the last 2 weeks?	Psychological Impact of Tinnitus Interview	general distress	Tinnitus-related distress			N/A	N/A	N/A	N/A	N/A
																		Questionnaire,		Closed		Tinnitus Cognitions Questionnaire (TCQ)	Tinnitus Cognitions Questionnaire																What is it about the tinnitus that has made you feel that way?	Psychological Impact of Tinnitus Interview	mood	Mood states			N/A	N/A	N/A	N/A	N/A
																		Questionnaire,		Closed		Tinnitus Coping Strategies Questionnaire (TCSQ)	Tinnitus Coping Strategies Questionnaire																How has your tinnitus been in the last couple of weeks? In general , how has your tinnitus affected you in the last 2 weeks?	Psychological Impact of Tinnitus Interview	suicidal thoughts and actions	Suicidal thoughts			N/A	N/A	N/A	N/A	N/A
																		Questionnaire,		Closed		Emotional distress subscale of the Tinnitus Questionnaire (ED-TQ)	Tinnitus Questionnaire																To what extent are your leisure or work activities interfered by your tinnitus? Did you ever decide not to go somewhere or not to do something because of your tinnitus?	Psychological Impact of Tinnitus Interview	avoidance of or interference with activities	Negative impact on activities			N/A	N/A	N/A	N/A	N/A
																		Questionnaire,		Closed		Beck Depression Inventory (BDI)		Beck Depression Inventory															Tinnitus Reaction Questionnaire (TRQ)	Tinnitus Reaction Questionnaire			Tinnitus-related distress	Suicidal thoughts	item 24 suicidal risk, mean 35.65 which reduced to 19.73 at follow up - significant reduction over time	N/A	N/A	N/A	N/A
																		Questionnaire,		Closed		Beck Hopelessness Sclae (BHS)		Beck Hopelessness Sclae															Tinnitus Coping Strategies Questionnaire (TCSQ)	Tinnitus Coping Strategies Questionnaire			cognitive and behavioral coping strategies in response to tinnitus	Difficulties coping	how frequently they employ each strategy whenever they are aware of their tinnitus and how beneficial they found each strategy when they apllied it	N/A	N/A	N/A	N/A
																																							Emotional distress subscale of the Tinnitus Questionnaire (ED-TQ)	Tinnitus Questionnaire			emotional distress	Tinnitus-related distress	N/A	N/A	N/A	N/A	N/A
16	2	2	0	2	6	A psychometric study of complaints in chronic tinnitus	Hiller, W.; Goebel, G.	not stated	Germany	journal article		36(4); 1992	not stated	to investigate the pattern of tinnitus complaints using a German translation of the TQ. 1) to replicate the factorial structure of the TQ in different and independent sample of tinnitus sufferers; 2) to investigate in more detail the stability and reliability of item groupings and the existence of possible subgroups; 3) to derive a clinically relevant scaling method for the TQ which can be used b…	non-interventional			Questionnaire,		Closed	0	Tinnitus Questionnaire (TQ) - German version	Tinnitus Questionnaire (German)		138	Patients		secondary care services	48	9.7	20-74	Male and female	6.5 (7.4)	not stated	not stated	moderate to severe and/or disabling tinnitus	no mean - TQ moderate - severe	none stated	Tinnitus Questionnaire (TQ) - German version	Tinnitus Questionnaire (German)			Suicidal risk	Suicidal thoughts	N/A	N/A	N/A	N/A	N/A
																																							Tinnitus Questionnaire (TQ) - German version	Tinnitus Questionnaire (German)			cognitive and emotional distress	Tinnitus-related distress	negative thoughts about the ability to cope with the tinnitus (items 13, 21,44), a pessimistic view of the future (items 27, 43, 17), cognitive expression of helpness (items 3, 47)	N/A	N/A	N/A	N/A
																																							Tinnitus Questionnaire (TQ) - German version	Tinnitus Questionnaire (German)			intrusiveness	Tinnitus intrusiveness	loudness, unpleasantness and distractive effects of the noises (items 10, 7, 35, 15, 48)	N/A	N/A	N/A	N/A
																																							Tinnitus Questionnaire (TQ) - German version	Tinnitus Questionnaire (German)			auditory perceptual difficulties	Negative effects on hearing	perceptual problems in groups of several persons (items 14,33,26), uncertainty about the origin of external sounds (item 9), difficulties using telephone (item 38)	N/A	N/A	N/A	N/A
																																							Tinnitus Questionnaire (TQ) - German version	Tinnitus Questionnaire (German)			sleep disturbance	Sleep difficulties	problems of falling asleep, waking up to early, sleep being interruped several times during the night	N/A	N/A	N/A	N/A
																																											somatic complaints	Bodily complaints	bodily complaints of head and neck - headache, pain in the head and ear, muscle tensions	N/A	N/A	N/A	N/A
17	2	2	0	2	6	Assessing audiological, pathophysiological, and psychological variables in chronic tinnitus: A study of reliability and search for prognostic factors	Hiller, W.; Goebel, G.	not stated	Germany	journal article		6(4); 1999	not stated	Study 2: To investigate whether specific patterns in tinnitus history or etiology are related systematically to the level of psychological distress.	non-interventional		Evaluation study	Other (please specify)	Structured interview/questionnaire	Closed	0	Structured Tinnitus Interview (STI)	Structured Tinnitus Interview		166	Patients		secondary care services	48.7	10.8	16-75	Male and female	not stated	both	both	not stated	not stated	none stated	Structured Tinnitus Interview (STI)	Structured Tinnitus Interview			Intrusiveness of the tinnitus	Tinnitus intrusiveness	The global score of the STI showed its closest associations with the intrusiveness of the tinnitus and emotional distress.	N/A	N/A	N/A	N/A
														To analyze the validity of the Structured Tinnitus Interview (STI) and the effects of audiological and medical variables on psychosocial distress				Questionnaire,		Closed		Hopkins Symptom Checklist (SCL-90-R; Derogatis 1977)		Symptom Checklist															Structured Tinnitus Interview (STI)	Structured Tinnitus Interview			Problems with relaxation and sleep,	Sleep difficulties	Difficulties with relaxation and sleep correlated higher with emotional problems than with psychosocial or occupational impairment	N/A	N/A	N/A	N/A
																																							Structured Tinnitus Interview (STI)	Structured Tinnitus Interview			Emotional distress	Tinnitus-related distress	N/A	N/A	N/A	N/A	N/A
																																							Structured Tinnitus Interview (STI)	Structured Tinnitus Interview			Dysfunctional cognition	Cognitive difficulties	N/A	N/A	N/A	N/A	N/A
																																							Structured Tinnitus Interview (STI)	Structured Tinnitus Interview			Psychosocial impairments	Quality of life (tinnitus)	N/A	N/A	N/A	N/A	N/A
																																							Structured Tinnitus Interview (STI)	Structured Tinnitus Interview			Occupational impairments	Negative impact on work activities	Occupational problems seemed to be accompanied more systematically by psychosocial disabilities than hearing problems	N/A	N/A	N/A	N/A
18	2	2	0	2	6	A factor analytical study of tinnitus complaint behaviour	Jakes, S. C.; Hallam, R. S.; Chambers, C.; Hinchcliffe, R.	not stated	United Kingdom	journal article		24; 1985	not stated	The interrelationship of various aspects of complaining about tinnitus, and of subjective and audiometric assesssments of tinnitus 'intensity' were examined by factor analytic technique. (1) is complaining about tinnitus best understood as unidimensional or multidimensional? (2) If multidimensional are the dimensions of complaining about tinnitus related to audiometric assessments of tinnitus ins…	non-interventional		not stated	Questionnaire,		Not known	0	Author devised questionnaire concerning features of tinnitus and other symptoms	Author's own		82	Patients		secondary care services	50.4	14	not stated	Male and female	5.5 (7.9)	not stated	not stated	not stated	not stated	none stated	Author devised questionnaire concerning features of tinnitus and other symptoms and about aspects of complaint about tinnitus and its effects (19 scales (items)) - between 2 and 5 response categories questionnaire (1st/2nd Facter structure)	Author's own			Distress attributed to tinnitus	Tinnitus-related distress	1st - effects of tinnitus on mood, family, social life and work 2nd - family/social life, irritability, depression, work, coping	N/A	N/A	N/A	N/A
																		Questionnaire,		Closed		Author devised questionnaire concerning aspects of complaint about tinnitus and its effects (19 scales (items)) - between 2 and 5 response categories questionnaire	Author's own																Author devised questionnaire concerning features of tinnitus and other symptoms and about aspects of complaint about tinnitus and its effects (19 scales (items)) - between 2 and 5 response categories questionnaire (1st/2nd Facter structure)	Author's own			Intrusiveness of tinnitus	Tinnitus intrusiveness	1st - Self-reported loudness, self-distracting, unpleasant and inability to cope. 2nd - reported loudness, unpleasant, distraction	N/A	N/A	N/A	N/A
																																							Author devised questionnaire concerning features of tinnitus and other symptoms and about aspects of complaint about tinnitus and its effects (19 scales (items)) - between 2 and 5 response categories questionnaire (1st/2nd Facter structure)	Author's own			interference with passive auditory entertainment	Negative effects on hearing	1st - interference of tinnitus by listening to music and watching the TV. 2nd - television, music, concentration (30)	N/A	N/A	N/A	N/A
																																							Author devised questionnaire concerning features of tinnitus and other symptoms and about aspects of complaint about tinnitus and its effects (19 scales (items)) - between 2 and 5 response categories questionnaire (1st/2nd Facter structure)	Author's own			sleep disturbance (insomnia)	Sleep difficulties	1st - middle insomnia, early insomnia. 2nd - middle insomnia, early insomnia, continuous tinnitus (39)	N/A	N/A	N/A	N/A
																																							Author devised questionnaire concerning features of tinnitus and other symptoms and about aspects of complaint about tinnitus and its effects (19 scales (items)) - between 2 and 5 response categories questionnaire (2nd factor structure only)	Author's own			tolerance	Acceptance of tinnitus	tolerance, reading, tinnitus getting worse (39)	N/A	N/A	N/A	N/A
																																							Author devised questionnaire concerning features of tinnitus and other symptoms and about aspects of complaint about tinnitus and its effects (19 scales (items)) - between 2 and 5 response categories questionnaire (2nd factor structure only)	Author's own						N/A	N/A	N/A	N/A
19	2	2	0	2	6	Impact of tinnitus on quality of patients' life according to self-assessment	Kaluzny, W.; Durko, T.; Pajor, A.	grappa@csk.umed.lodz.pl	Poland	journal article		March 2005	not stated	The aim of study was to evaluate the impact of tinnitus on patients life and emotional status and to investigate the aetiology, audiological parameters and tinnitus characteristics	non-interventional		not stated	Questionnaire,		Closed	0	Author-derived "interview" questionnaire -three parts: A (risk factors predisposing to tinnitus), B (tinnitus characteristics), C (impact of tinnitus of emotional status and quality of life)	Author's own		157	Patients		secondary care services	49.8	13.4	20-78	Male and female	longer than 3 months	not stated	not stated	not stated	not stated	none stated	Part C. emotional item 1	Author's own			emotional status	Irritable	irritation (46%). Tinnitus cause that I am irritated and angry	N/A	N/A	N/A	N/A
																																							Part C. emotional item 2	Author's own			emotional status	Concentration difficulties	concentration difficulties (45%). Tinnitus causes that I have concentration difficulties	N/A	N/A	N/A	N/A
																																							Part C. emotional item 4	Author's own			emotional status	Negative effects on hearing	difficulties in speech understanding (48%). Tinnitus diminishes my speech understanding	N/A	N/A	N/A	N/A
																																							Part C.quality of life item 1	Author's own			quality of life	Difficulties coping	avoiding noise (38%). I avoid noise due to tinnitus	N/A	N/A	N/A	N/A
																																							Part C.quality of life item 4	Author's own			quality of life	Negative impact on activities	interference with rest (52%). Tinnitus interferes with rest	N/A	N/A	N/A	N/A
																																							Part C.quality of life item 5	Author's own			quality of life	Difficulties coping	avoiding silence (39%). I avoid silence due to tinnitus	N/A	N/A	N/A	N/A
20	1	2	0	0	3	The comparison of acoustic and psychic parameters of subjective tinnitus	Karatas, E. Deniz, M	erkaratas@yahoo.com	Turkey	journal article		269; 2012	not stated	The objective of the present study is the comparison of the acoustic and psychotic evaluation of subjective tinnitus. With this study, we aim at assessing the correlation between audiometric data, and psychotic and acoustic measures associated with subjective tinnitus. The aim of this study is to clarify the importance of the psychological process in determining the degree of subjective tinnitus.	non-interventional			Questionnaire,		Closed	0	Tinnitus Handicap Inventory (THI) Turkish version	Tinnitus Handicap Inventory (Arabic)		54	Patients		secondary care services	39.68		20-52	Male and female	2.9	not stated	not stated	38.77 +/- 23.63 (mild in 11 cases (THI 0 -16), light in 16 cases (THI 18 - 36), moderate in 14 cases (THI 38 - 56), severe in 9 cases (THI 58 - 76) and catastrophic (THI 78 - 100) in 4 cases)	Complete grading scale	none stated	Tinnitus Handicap Inventory (THI) Turkish version	Tinnitus Handicap Inventory (Turkish)			Tinnitus intrusiveness	Tinnitus intrusiveness	N/A	N/A	N/A	N/A	N/A
																		Questionnaire,		Closed		Beck Depression Inventory (BDI) Turkish version		Beck Depression Inventory ( Turkish )															BDI (score ranging 0-63)	Beck Depression Inventory			Depression	Depressive symptoms	mean score 9.94 +/-10.44; Ten patients (%18.51) with tinnitus had C17 points score, which was signiﬁcant for depressive symptomatology.	N/A	N/A	N/A	N/A
																		Other (please specify)	Visual Analog Scale (VAS)	Closed		Visual Analogue Scale (VAS)		Patient-reported numerical rating/visual analogue scales															Visual Analog Scale (VAS)-1 - measurement of tinnitus	Patient-reported numerical rating scales overall effect on tinnitus			severity of tinnitus	Tinnitus loudness	5,01 +/- 2,31 There were statistically signiﬁcant correlations between VAS 1, 2, 3 scores and loudness discomfort level, minimun maskig level and residual inhibiiton (P < 0.05).	N/A	N/A	N/A	N/A
																																							Visual Analog Scale (VAS)-4 attention deficit	Patient-reported numerical rating/visual analogue scales			Attention deficit	Concentration difficulties	3.56 ± 3.30	N/A	N/A	N/A	N/A
																																							Visual Analog Scale (VAS) - 5 - Sleep disorders	Patient-reported numerical rating scales sleep			Sleep disorders	Sleep difficulties	3.31 ± 3.31	N/A	N/A	N/A	N/A
																																							International Tinnitus Inventory	International Tinnitus Inventory			Perceived effect of tinnitus on hearing	Negative effects on hearing	Item 2. think about a situation where you most wanted to hear. Over the past two weeks, How much difficulty has the tinnitus caused in that situation	N/A	N/A	N/A	N/A
21	2	2	0	2	6	Development of the International Tinnitus Inventory (ITI): A Patient-Directed Problem Questionnaire	Kennedy, V.; Chéry-Croze, S.; Stephens, D.; Kramer,S.; Thai-Van, H.; Collet, L.	vkennedy@doctors.org.uk	Wales, United Kingdom	journal article		3(4); 2005	not stated	To develop the International Tinnitus questionnaire comprising eigth items - translate and validate in french and english - modelled on the IOI-HA,	non-interventional		not stated	Questionnaire,		Closed	0	International Tinnitus Inventory (ITI)	International Tinnitus Inventory		141	Patients		secondary care services	61	13	not stated	Male and female	median = 7 (range: 1 to 57)	not stated	not stated	not stated	not stated	none stated	International Tinnitus Inventory	International Tinnitus Inventory			health	Quality of life (tinnitus)	Item 3 How much has your tinnitus caused or agrrvated other health problems	N/A	N/A	N/A	N/A
									France																300			general public	49.4	14.2	18-86	Male and female	not stated	not stated	not stated	not stated	not stated		International Tinnitus Inventory	International Tinnitus Inventory			Sleep	Sleep difficulties	Item 4. how much has your tinnitus affected your sleep	N/A	N/A	N/A	N/A
																																							International Tinnitus Inventory	International Tinnitus Inventory			Peace of mind	Loss of peace	Item 5. how much has your tinnitus affected your peace of mind	N/A	N/A	N/A	N/A
																																							International Tinnitus Inventory	International Tinnitus Inventory			other people	cannot code	Item 6. how much do you think your tinnitus has affected other people	N/A	N/A	N/A	N/A
																																							International Tinnitus Inventory	International Tinnitus Inventory			activities	Negative impact on activities	Item 7. how much has your tinnitus affected the things you can do	N/A	N/A	N/A	N/A
																																							International Tinnitus Inventory	International Tinnitus Inventory			enjoyment of life	Quality of life (tinnitus)	Item 8. how much has your tinnitus changed your enjoyment of life	N/A	N/A	N/A	N/A
																																							International Tinnitus Inventory	International Tinnitus Inventory			sense of annoyance generated by the tinnitus	Annoyance	Item 1. on an average day, how often have you found it annoying?	N/A	N/A	N/A	N/A
22	2	2	1	2	7	The Role of Fear-Avoidance Cognitions and Behaviors in Patients with Chronic Tinnitus	Kleinstauber, M.; Jasper, K.; Schweda, I.; Hiller, W.; Andersson, A.; Weise, C.	kleinsta@uni-mainz.de	Germany	journal article		42(2); 2013	not stated	the first aim of the current study was to develop a self-report scale for measuring catastrophizing thoughts about tinnitus and its consequences in particular, as well as tinnitus-related fear-avoidance behaviors. The second aim of the study was to replicate the mediation effects of behavioral avoidance, especially fear-avoidance behavior, on the relationship between anxiety sensitivity and tinni…	non-interventional		not stated	Questionnaire,		Closed	0	Tinnitus Handicap Inventory (THI) - German version	Tinnitus Handicap Inventory (German)		373	Patients		secondary care services	51.66	12.14	not stated	Male and female	8.1 (7.7 )	not stated	not stated	THI = 41.33 (SD: 18.46) (Mini-TQ >=8; THI>=18)	Mild - Severe	none stated	Tinnitus Handicap Inventory (THI) - German version	Tinnitus Handicap Inventory (German)			Tinnitus handicap	cannot code	Mean = 41.33; The subscales and total score of the T-FAS were predominantly highly correlated (r ≥ .50) with the total score of the THI and its subscales.	N/A	N/A	N/A	N/A
																		Questionnaire,		Closed		Anxiety Sensitivity Index-3 (ASI-3) - German version		Anxiety Sensitivity Index (German)				non-clinical											Tinnitus Handicap Inventory (THI) - German version	Tinnitus Handicap Inventory (German)			Functional	Functional difficulties due to tinnitus	M=19.40	N/A	N/A	N/A	N/A
																		Questionnaire,		Closed		Hospital Anxiety and depression sclae (HADS)		Hospital Anxiety and Depression scale				general public											Tinnitus Handicap Inventory (THI) - German version	Tinnitus Handicap Inventory (German)			Emotional	Tinnitus-related distress	M=12.70	N/A	N/A	N/A	N/A
																		Questionnaire,		Closed		Tinnitus Fear-Avoidance Cognitions and Behaviors Scale (T-FAS)	Tinnitus Fear-Avoidance Cognitions and Behaviors Scale																Tinnitus Handicap Inventory (THI) - German version	Tinnitus Handicap Inventory (German)			Catastrophic	Negative thoughts	M=9.23	N/A	N/A	N/A	N/A
																		Questionnaire,		Closed		Big Five Inventory (BFI-10) - German version		Big Five Inventory (German)															Anxiety Sensitivity Index-3 (ASI-3) - German version	Tinnitus Handicap Inventory (German)			fear of arousal-related sensations and their consequences	Fear	Mean = 22.27	N/A	N/A	N/A	N/A
																																							Anxiety Sensitivity Index-3 (ASI-3) - German version	Tinnitus Handicap Inventory (German)			Cognitive concernes	Worries/concerns	M=6.92	N/A	N/A	N/A	N/A
																																							Anxiety Sensitivity Index-3 (ASI-3) - German version	Tinnitus Handicap Inventory (German)			Social concerns	Worries/concerns	M=6.53	N/A	N/A	N/A	N/A
																																							Anxiety Sensitivity Index-3 (ASI-3) - German version	Tinnitus Handicap Inventory (German)			Physical concerns	Worries/concerns	M=8.83	N/A	N/A	N/A	N/A
																																							Tinnitus Fear-Avoidance Cognitions and Behaviors Scale - Fear-Avoidance Cognition (FAS-C)	Tinnitus Fear-Avoidance Cognitions and Behaviors Scale			Fear- avoidance Cognitions	Fear	Catastrophizing cognitions about tinnitus and its consequences. 2. I’m afraid that the tinnitus will become more disturbing and impairing in the long term. 3. I’m afraid that the tinnitus will threaten/affect my mental health in the long term. 4. I’m afraid that the tinnitus will reduce my quality of life and general wellbeing in the long term.	N/A	N/A	N/A	N/A
																																							Tinnitus Fear-Avoidance Cognitions and Behaviors Scale - Tinnitus-related (FAS-BT)	Tinnitus Fear-Avoidance Cognitions and Behaviors Scale			Tinnitus-related Fear Avoidance Behavior	Difficulties coping	One factor was related to activities that can intensify the tinnitus perception directly. 7. Due to my tinnitus I avoid sporting activities. 8. Due to my tinnitus I avoid exhausting activities and jobs. 9. Due to my tinnitus I avoid activities that demand high levels of concentration.	N/A	N/A	N/A	N/A
																																							Tinnitus Fear-Avoidance Cognitions and Behaviors Scale - Ear-related (FAS-BE)	Tinnitus Fear-Avoidance Cognitions and Behaviors Scale			Ear-related Fear Avoidance Behavior	Difficulties coping	avoidance behaviors that aim to prevent harm to the ear, which could indirectly lead to tinnitus deterioration. 13. Due to my tinnitus I try to avoid getting water into my ears when I have a shower, a bath or when I go swimming. 14. Due to my tinnitus I try to protect my ears whenever it is possible (e.g., wearing ear plugs, a cap, or by blocking my ears). 15. Due to my tinnitus I do everything t…	N/A	N/A	N/A	N/A
23	1	2	0	2	5	The psychometric properties of a tinnitus handicap questionnaire	Kuk, FK.; Tyler, RS.; Russell, D.; Jordan, H.	not stated	United States	journal article		11(6); 1990	not stated	The purpose of the present investigation was to develop a tinnitus handicap questionnaire to measure the patients’ perceived degree of handicap due to tinnitus. There were two phases to this investigation.	non-interventional		not stated	Questionnaire,		Closed	0	First-version 87-itemTinnitus handicap questionnaire based on Tyler and baker (1983)	Tinnitus Handicap Questionnaire		100	Patients		secondary care services	53	not stated	not stated	Male and female	not stated	not stated	not stated	not stated	not stated	none stated	First version 87-item Tinnitus Handicap Questionnaire - hearing subscale	Tinnitus Handicap Questionnaire			Effects of tinnitus on hearing	Negative effects on hearing	"Tinnitus interferes with my ability to tell where sounds are coming from." (mean score 43,8) "I am hesitant to respond to what is said to me because of tinnitus" (mean score 40,2). "Tinnitus interferes with my speech understanding when listening to the television". (mean score 36,6)	N/A	N/A	N/A	N/A
														The purpose of the first study was to generate a manageable number of items to be included in the questionnaire for final validation.				Questionnaire,		Closed		Second-version 27-item questionnaire (tinnitus handicap questionnaire)	Tinnitus Handicap Questionnaire		275	Patients		secondary care services	M: 50.0; F: 55.5	not stated	not stated	Male and female	not stated	not stated	not stated	27-item THQ: M (n=171) = 35.6 (SE = 1.7; range = 0-90). F (n=104) = 39.0 (SE = 2.5; range = 0-90).	no grading scale		First version 87-item Tinnitus Handicap Questionnaire - life-style subscale	Tinnitus Handicap Questionnaire			Effects of tinnitus on life-style	Quality of life (tinnitus)	"My tinnitus is better when I concentrate on my work". (48,0) "Tinnitus causes me to avoid noisy situations". (47,3) "I find it difficult to explain what tinnitus is to others". (37,3)	N/A	N/A	N/A	N/A
														The purpose of the second study was to determine the psychometric properties (i.e., reliability, validity, and factor structure) of the questionnaire.				Questionnaire,		Closed		Life Satisfaction Scale - set of 10-item selected from Lohmann(1980)		Life Satisfaction Scale	53 of 275 completed														First version 87-item Tinnitus Handicap Questionnaire - health subscale	Tinnitus Handicap Questionnaire			Effects of tinnitus on health	cannot code	"My tinnitus has gotten worse over the years". (54,3) "The increased severity of tinnitus worries me". (50,8) "I have trouble falling asleep at night because of tinnitus". (43,9)	N/A	N/A	N/A	N/A
																		Questionnaire,		Closed		Zung Self-rating Depression Scale (Zung, 1965)		Zung Self-rating Depression Scale	53 of 275 completed														First version 87-item Tinnitus Handicap Questionnaire - emotion subscale	Tinnitus Handicap Questionnaire			Effects of tinnitus on the emotion of the sufferer	Tinnitus-related distress	"I think I have a healthy outlook on tinnitus". (64,5) "I think my tinnitus can be helped one day". (58,8) "Tinnitus makes me feel annoyed". (44,4)	N/A	N/A	N/A	N/A
																		Questionnaire,		Closed		Physical Health Status (adapted from Duke_UNC Health Profile (Parkerson et al., 1981)		Physical Health Status	53 of 275 completed														First version 87-item Tinnitus Handicap Questionnaire - other	Tinnitus Handicap Questionnaire			others' reactions to the tinnitus sufferer	Lack of support from family and friends	"Tinnitus is worse in quiet". (70,0) "I have support from my friends regarding my tinnitus". (64,1) "The general public does not know about the devastating nature of tinnitus". (64,1)	N/A	N/A	N/A	N/A
																		Questionnaire,		Closed		Marlowe-Crowne Social Desirability Inventory (33-item -true or false). (Crowne & Marlowe, 1964)		Marlowe-Crowne Social Desirability Inventory	53 of 275 completed														Tinnitus Handicap Questionnaire - 27 item	Tinnitus Handicap Questionnaire			Effects of tinnitus on the patients social, emotional and physical behaviour	cannot code	mean total score 31.2 (SD 26.0); I do not enjoy life because of tinnitus. Tinnitus causes me to feel depressed. Tinnitus contributes to a feeling of general ill health.	N/A	N/A	N/A	N/A
																		Other (please specify)	Numerical rating scale (100 points)	Closed		required patients to subjectively judge the general loudness of their tinnitus in their daily lives using a 0 to 100 point scale	Patient-reported numerical rating scales tinnitus loudness		53 of 275 completed														Tinnitus Handicap Questionnaire - 27 item	Tinnitus Handicap Questionnaire			Patients hearing ability	Negative effects on hearing	mean total score 28.4 (SD 25.8); I am unable to follow a conversation during meetings because of tinnitus. Tinnitus interferes with my ability to tell where sounds are coming from. Tinnitus interferes with my speech understanding when listening to the television.	N/A	N/A	N/A	N/A
																																							Tinnitus Handicap Questionnaire - 27 item	Tinnitus Handicap Questionnaire			Patients views of tinnitus	Lack of support from family and friends	mean total score 46.1 (SD21.1); I think I have a healthy outlook on tinnitus. I have support from my friends regarding my tinnitus. The general public does not know about the devastating nature of tinnitus.	N/A	N/A	N/A	N/A
																																							Numerical rating scale (loudness)	Patient-reported numerical rating scales tinnitus loudness			Tinntius loudness	Tinnitus loudness	VAS = 24.0	N/A	N/A	N/A	N/A
24	2	2	0	2	6	Psychiatric comorbidity in a population of outpatients affected by tinnitus	Marciano, E.; Carrabba, L.; Giannini, P.; Sementina, C.; Verde, P.; Bruno, C.; Di Pietro, G.; Ponsillo, NG.	marciano@unina.it	Italy	journal article		42; 2003	1999	to outline the psycopathological characteristics of a populationof outpatients affected by tinnitus and to consider its impact on their mental state and ability to function in major areas of their lives	non-interventional		not stated	Interviews		Closed	1	semi-structural interview adapted from the "Oregon Tinnitus Data Archive"	Semi-structural interview adapted from the "Oregon Tinnitus Data Archive"		75	Patients		secondary care services	44	14.17	not stated	Male and female	> 6 months	both	not stated	not stated	not stated	none stated	Semi-structural interview	Semi-structured interview			Tinnitus annoyance	Annoyance	40 pts (53%) moderate level; 26 pts (35%) severe level; 9 pts (12%) mild level	N/A	N/A	N/A	N/A
																		Interviews		Open		Mini International Neuropsychiatry Interview (MINI)		Mini International Neuropsychiatry Interview															Tinnitus Intensity Index (TII)	Tinnitus Intensity Index			Tinnitus loudness	Tinnitus loudness	46 pts (61%) number 2 (3 pts(6%)) number 3 (16 pts (35%)) number 4 (8 pts (17%)) number 5 (11 pts (24%)) number 6 (4 pts (9%)) number 7 (4 pts (9%))	N/A	N/A	N/A	N/A
																		Questionnaire,		Closed		Minnesota Multiphasic Personality Inventory (MMPI)		Minnesota Multiphasic Personality Inventory																					N/A	N/A	N/A	N/A	N/A
																		Questionnaire,	Structured interview	Open		American Diagnostic and Statistical Manual (DSM III) criteria		Diagnostic and Statistical Manuela of Mental Disorders																					N/A	N/A	N/A	N/A	N/A
																		Questionnaire,	Tinnitus Intensity Index (TII)	Closed		Tinnitus Intensity Index (TII)	Tinnitus Intensity Index																						N/A	N/A	N/A	N/A	N/A
25	1	2	0	0	3	The Effect of Insomnia on Tinnitus	Miguel, GS.; Yaremchuk, K.; Roth, T.; Peterson, E.	gmiguell@hfhs.org	United States	journal article		123(10); 2014	January 2009 - December 2011	To see how chronic tinnitus sufferers who are unmanageable to maximized medical therapy can benefit by decreasing their subjective complaints from a sleep evaluation and treatment.	non-interventional		Retrospective observational	Questionnaire,		Closed	0	Tinnitus Reaction Questionnaire (TRQ) (Wilson 1991)	Tinnitus Reaction Questionnaire		117	Patients		secondary care services	63	not stated	not stated	Male and female	not stated	not stated	not stated	TRQ = Tinnitus only = 42.4; Tinnitus +Insomnia = 71.6	no grading scale	Insomnia	Tinnitus Reaction Questionnaire	Tinnitus Reaction Questionnaire			psychological disturbance from tinnitus	Tinnitus-related distress	The Tinnitus Reaction Questionnaire and mean Insomnia Severity Index scores were tested for differences between the 2 groups (Table 2). All comparisons were significant with higher scores seen for the tinnitus + insomnia group.	N/A	N/A	N/A	N/A
																						Insomnia Severity Index		Insomnia Severity Index															Tinnitus Reaction Questionnaire - Emotional	Tinnitus Reaction Questionnaire			Emotional	cannot code	N/A	N/A	N/A	N/A	N/A
																																							Tinnitus Reaction Questionnaire - Functional	Tinnitus Reaction Questionnaire			Functional	cannot code	N/A	N/A	N/A	N/A	N/A
																																							Tinnitus Reaction Questionnaire - Catastrophic	Tinnitus Reaction Questionnaire			Catastrophic	cannot code	N/A	N/A	N/A	N/A	N/A
																																							Insomnia Severity Index	Insomnia Severity Index			Insomnia caused by tinnitus	Sleep difficulties	N/A	N/A	N/A	N/A	N/A
26	2	2	0	0	4	Relationships among Psychoacoustic Judgments, Speech Understanding Ability and Self-Perceived Handicap in Tinnitus Subjects	Newman, CW.; Wharton JA.; Shivapuja BG.; Jacobson GP.	not stated	United States	journal article		33; 1994	not stated	The purpose of the present investigation was to examine the relationships among tinnitus sensation, perceived tinnitus handicap and speech understanding ability in the same tinnitus subjects. More specifically, this study was undertaken: (I) to assess the effect of tinnitus on speech understanding in the presence of hearing loss; (2) to examine the association between subjective psychoacoustic me…	non-interventional		not stated	Questionnaire,		Closed	0	Tinnitus Handicap Inventory (THQ)	Tinnitus Handicap Questionnaire		23	Patients		secondary care services	40	6.1	29-49	Male and female	10.7 (9.2)	not stated	not stated	THQ = 31.9 (SD: 22.5)	no grading scale	hearing loss					Tinnitus sensation	cannot code	N/A	N/A	N/A	N/A	N/A
																		Other (please specify)	Numerical rating scale (100-points)	Closed		Subjective loudness judgment scale	Patient-reported numerical rating scales tinnitus loudness																Tinnitus Handicap Questionnaire - Factor 1	Tinnitus Handicap Questionnaire			individuals's physical health, social, emotional	Quality of life (tinnitus)	mean 25,2 (SD 25,5)	N/A	N/A	N/A	N/A
																		Other (please specify)	Numerical rating scale (100-points)	Closed		Subjective judgment of the overall general loudness	Patient-reported numerical rating scales tinnitus loudness																Tinnitus Handicap Questionnaire - Factor 2	Tinnitus Handicap Questionnaire			hearing difficulty related to tinnitus	Negative effects on hearing	mean 34,9 (SD 25,9)	N/A	N/A	N/A	N/A
																																							Tinnitus Handicap Questionnaire - Factor 3	Tinnitus Handicap Questionnaire			patient’s personal viewpoint of tinnitus	Need for knowledge	mean 48,8 (SD 21,1)	N/A	N/A	N/A	N/A
																																							Subjective judgment of the overall annoyance of tinnitus ( 100-point scale).	Patient-reported numerical rating scales annoyance			Annoyance of tinnitus	Annoyance	mean 64,9 (SD 31,1) - moderate degree of annoyance. As the hearing loss at the tinnitus pitch increased, lower levels of tinnitus seemed loud and thus more annoying. The data also showed trends (not significant) suggesting that patients who did not have a positive outlook on their tinnitus (factor 3,-0.894) found it more annoying (1.328) and had more difficulty with speech communication (factor 2…	N/A	N/A	N/A	N/A
																																							Subjective judgment of the overall general loudness (100-point scale).	Patient-reported numerical rating scales tinnitus loudness			Perceived tinnitus loudness	Tinnitus loudness	50 (out of 100) tinnitus subjects tend to select a mid-point along a loudness judgment continuum.	N/A	N/A	N/A	N/A
27	2	2	0	2	6	Development of the Tinnitus Handicap Inventory	Newman, CW.; Jacobson, GP.; Spitzer, JB.	not stated	United States	journal article		122; 1996	not stated	the present investigation was undertaken to develop a self-report Tinnitus Handicap Inventory (THI) with the following characteristics: (1) it should be brief so that it can be used in a busy clinical practice; (2) it should be easy to administer and interpret; (3) it should be broad in scope, reflecting the impact of tinnitus on everyday function; and (4) it should be psychometrically robust, de…	non-interventional			Questionnaire,		Closed	0	Tinnitus Handicap Inventory (THI) (25-item)	Tinnitus Handicap Inventory		84	Patients		secondary care services	54.3	14.3	23-77	Male and female	not stated	not stated	not stated	not stated	not stated		Tinnitus Handicap Inventory - 25 item	Tinnitus Handicap Inventory			Functional limitations	Functional difficulties due to tinnitus	Does your tinnitus get worse when you are under stress? (43% yes)	N/A	N/A	N/A	N/A
																		Questionnaire,		Closed		Tinnitus Handicap Questionnaire (27-item self-assessment)	Tinnitus Handicap Questionnaire		66	Patients		secondary care services	54.2	13.1	27-80	Male and female	6.7 (SD: 10.02) (bothered by = 4.5 (SD: 9.78))	not stated	not stated	25,4 (+/-20,5)	no grading scale	none stated	Tinnitus Handicap Inventory - 25 item	Tinnitus Handicap Inventory			Emotional	Tinnitus-related distress	Because of your tinnitus do you feel frustrated? (29% yes)	N/A	N/A	N/A	N/A
																		Questionnaire,		Closed		Beck Depression Inventory (Beck) (21.item scale)		Beck Depression Inventory															Tinnitus Handicap Inventory - 25 item	Tinnitus Handicap Inventory			Catastrophic	Negative thoughts	Do you feel as though you cannot escape tinnitus? (60% yes), "Do you feel that you have no control over tinnitus?" (63% yes)	N/A	N/A	N/A	N/A
																		Questionnaire,		Closed		Modified Somatic Perception Questionnaire (13-item scale)		Modified Somatic Perception Questionnaire															Symptom rating scales	Patient-reported numerical rating scales concentration disturbance			Concentration	Concentration difficulties	26.2 +/- 29.0; range scores 0-100. moderate to high correlations (r=.47 to r=.72) were found between the THI (total and subscales) and the symptom rating scales of annoyance, sleep, depression, and concentration	N/A	N/A	N/A	N/A
																		Other (please specify)	Numerical rating scale (10 points)	Closed		Subjective judgement on perceived tinnitus loudness (10-point-scale)	Patient-reported numerical rating scales tinnitus loudness																	Patient-reported numerical rating scales annoyance			Annoyance	Annoyance	52.0 +/- 34.3, range scores 1-100	N/A	N/A	N/A	N/A
																		Other (please specify)	Numerical rating scale (10 points)	Closed		Subjective judgement on perceived tinnitus pitch (10-point-scale)	Patient-reported numerical rating scales pitch																	Patient-reported numerical rating scales sleep			Sleep disturbance	Sleep difficulties	31.6 +/- 37.3, range scores 0-100	N/A	N/A	N/A	N/A
																		Other (please specify)	Numerical rating scale (100 points)	Closed		Symptom rating scales (100-point scale) - annoyance, sleep disruption, depression, concentration disturbance	Patient-reported numerical rating scales annoyance																	Patient-reported numerical rating scales depression			Depression	Depressive symptoms	24.0 +/- 28.2, range scores 0-100	N/A	N/A	N/A	N/A
																		Other (please specify)	Numerical rating scale (100 points)	Closed		Symptom rating scales (100-point scale) - annoyance, sleep disruption, depression, concentration disturbance		Patient-reported numerical rating scales sleep															Tinnitus rating	Tinnitus Rating Scale			Tinnitus pitch	Tinnitus pitch	6.4+/-2.7; range 1-10	N/A	N/A	N/A	N/A
																		Other (please specify)	Numerical rating scale (100 points)	Closed		Symptom rating scales (100-point scale) - annoyance, sleep disruption, depression, concentration disturbance		Patient-reported numerical rating scales depression																Tinnitus Rating Scale			Tinnitus loudness	Tinnitus loudness	6.1+/-2.6; range 1-10	N/A	N/A	N/A	N/A
																		Other (please specify)	Numerical rating scale (100 points)	Closed		Symptom rating scales (100-point scale) - annoyance, sleep disruption, depression, concentration disturbance		Patient-reported numerical rating scales concentration disturbance																					N/A	N/A	N/A	N/A	N/A
28	2	2	0	2	6	Tinnitus severity and its association with cognitive and somatic anxiety: a critical study	Ooms, E.; Vanheule, S.; Meganck,R.; Vinck, B.; Watelet, JP.; Dhooge I.	Els.Ooms@Ugent.be	Belgium	journal article		269; 2012	not stated	we will investigate the relationship between cognitive and somatic anxiety and tinnitus severity while deleting overlapping items from their respective measurement instruments.	non-interventional		cross- sectional design	Questionnaire,		Closed	0	State and Trait Anxiety Inventory (STAI) - Dutch version		State and Trait Anxiety Inventory (Dutch)	71	Patients		secondary care services	49	13.03	not stated	Male and female	43.9 months (SD = 58.27)	not stated	not stated	THI=43.36 (SD=22.34). THI = 15.5% light handicap (0-16); 25.4% mild handicap (18-36); 29.6 moderate handicap (38-56); 22.5% severe handicap (58-76); 7% catastrophic handicap (78-100).	Complete grading scale	none stated	State and Trait Anxiety Inventory (STAI) - Dutch version	State and Trait Anxiety Inventory (Dutch)			cognitive anxiety	Anxiety	state axiety and anxious tendency	N/A	N/A	N/A	N/A
																		Questionnaire,		Closed		Tinnitus Handicap Inventory (THI) - Dutch version	Tinnitus Handicap Inventory (Dutch)																Tinnitus Handicap Inventory (THI) - Dutch version	Tinnitus Handicap Inventory (Dutch)			impact of tinnitus on daily life/Handicap	Quality of life (tinnitus)	N/A	N/A	N/A	N/A	N/A
																		Questionnaire,		Closed		Authors developed a list based on the somatic anxiety symptoms of the Diagnostic and Statistical Manual for Mental disorders (DSM-IV)		author's own																					N/A	N/A	N/A	N/A	N/A
29	1	2	0	2	5	Tinnitus aurium: Differential aspects of the subjectively perceived strain	Perrig-Chiello P	not stated	Switzerland	journal article		1996	1989- Feb 1994	to focus on personality and psychological variables (including self-attention and control) which could influence the subjectively perceived strain of tinnitus	non-interventional		not stated	Questionnaire,		Closed	0	Self-attention to the tinnitus	author's own question		50	Patients		secondary care services	not stated	not stated	20-60 (F 17: M 33)	Male and female	6.3 (3 months to 26 years)	not stated	not stated	Light n=20', and 'severe n=30' grading using the classification of Klockhoff and Lindblom (1967)	Complete grading scale	none stated					Self-attention to the tinnitus	Ability to ignore	ability to often ignore the tinnitus	N/A	N/A	N/A	N/A
																		Questionnaire,		Closed		5 step scale (authors own) to assess influence of tinnitus on private life, professional life and general	5 step scale (authors own) to assess influence of tinnitus on private life, professional life and general
																		Questionnaire,		Closed		Self-attention psychological questionnaire (Filipp and Freudenberg, 1988)
																		Questionnaire,		Closed		Self-control for illness and health (Lohaus and Schmitt 1989)
																		Questionnaire,		Closed		Personality questionnaire (Becker 1989)
30	1	2	0	2	5	Psychological profile and somatic complaints between help-seeking and non-help-seeking tinnitus subjects	Scott, B.; Lindberg P.	berit.scott@psyk.uu.se	Sweden	journal article		41; 2000	not stated	The present study examines whether the help-seeking tinnitus patients differ in psychological (state-trait) proﬁle from the non-help-seeking tinnitus subjects and control subjects. Important facets of personality such as anger, anxiety, depression and dispositional style are examined.The study also examines if help-seeking tinnitus patients differ in frequency and severity of somatization as well…	non-interventional		not stated	Questionnaire,		Closed	0	Tinnitus Incidence and Demographic Questions	Author's own		117	Patients	Help-seeking	secondary care services	M: 53.9; F: 55.7	not stated	M: 22-78; F: 20-77	Male and female	6 mths - > 5 years	constant	not stated	Grade 1 (3.5%); grade 2 (39.7%); grade 3 (56.8%)	Complete grading scale	none stated	Somatic Complaint Scale	Somatic Complaint Scale			Somatic Complaint	Bodily complaints	The TH group showed the highest mean scores on all variables except LBP. Post hoc tests showed significant differences between all groups for problems with sleep and concentration. For headache and muscle tension, significant differences were found between the TNH and the C groups and the TH and the C groups, respectively.	N/A	N/A	N/A	N/A
																		Questionnaire,		Closed		Somatic Complaint Scale		Somatic Complaint Scale	201	Patients	non-help seeking tinnitus	general public	M: 52.6; F: 52.1	not stated	M: 19-82; F: 18-83	Male and female		not stated	not stated	The subjects were also asked to classify their tinnitus into three grades.1 The grades were the following: 1) audible only in silent environment, 2) audible at low environmental noise levels, and 3) audible in all environmental noise levels.			Life Orientation Test (LOT)	Life Orientation Test			Expectancies - Lifestyle/psychologicals factors	Health-related quality of life	It is worth noting that the TH group showed lower values on dispositional style (LOT) (i.e., this group had lower expectancies regarding outcome than the other groups).	N/A	N/A	N/A	N/A
																		Questionnaire,		Closed		Life Orientation Test (LOT)		Life Orientation Test															State-Trait Anxiety Inventory (STAI)	State Trait Anxiety Inventory			Anxiety	Anxiety	Post hoc test showed significant differences among all three samples for CES-D and STAI-S (P 0.001).	N/A	N/A	N/A	N/A
																		Questionnaire,		Closed		State-Trait Anxiety Inventory (STAI)		State Trait Anxiety Inventory															The Epidemiological Studies Depression Scale (CES-D)	Epidemiological Studies Depression Scale			Depression	Depression	Noticeably, the TH group met the criteria for depression in the CES-D, which is set at a score of 16	N/A	N/A	N/A	N/A
																		Questionnaire,		Closed		Negative Mood Scale (NM)		Negative Mood Scale															Negative Mood Scale (NM)	Negative Mood Scale			Reaction to stress	Mood states	A negative mood component in reaction to stress	N/A	N/A	N/A	N/A
																		Questionnaire,		Closed		Daily Hassles Scale (DH)		Daily Hassles Scale															Daily Hassles Scale (DH)	Daily Hassles Scale			irritation of perceived stress from daily-life events	Irritable	N/A	N/A	N/A	N/A	N/A
																		Questionnaire,		Closed		The Epidemiological Studies Depression Scale (CES-D)		Epidemiological Studies Depression Scale															Trait Anger Scale (STAS-T)	State Trait Anxiety Inventory			Negative affect	General distress	N/A	N/A	N/A	N/A	N/A
31	2	2	0	2	6	Gender and chronic tinnitus: differences in tinnitus-related distress depend on age and duration of tinnitus	Seydel, C.; Haupt, H.; Olze, H.; Szczepek, A.; Mazurek, B.	birgit.mazurek@charite.de	Germany	journal article		2013-09-01	Mar 2005 - Feb 2009	To assess whether the degree of tinnitus annoyance can be influenced by gender, age and duration of tinnitus	non-interventional		cross-sectional study	Questionnaire,		Closed	0	Tinnitus Questionnaire and subscales	Tinnitus Questionnaire		1064	Patients		secondary care services	50	12.5	17-81	Male and female	> 3 months	not stated	not stated	TQ: 37.4 (16.2) - excluded TQ score 60 - 84	Mild - Severe	hearing loss	TQ	Tinnitus Questionnaire			Tinnitus annoyance	Annoyance	TQ mean 37.4, Psychological	N/A	N/A	N/A	N/A
																		Questionnaire,		Closed		The Perceived Stress Questionnaire (PSQ)		Perceived Stress Questionnaire															TQ- emotional	Tinnitus Questionnaire			emotional distress	Tinnitus-related distress	Second highest mean score: 10.2 (0 to 100)	N/A	N/A	N/A	N/A
																		Questionnaire,		Closed		Proactive Coping Inventory (PCI)		Proactive Coping Inventory (PCI)															TQ- cognitive	Tinnitus Questionnaire			cognitive distress	Cognitive difficulties	N/A	N/A	N/A	N/A	N/A
																		Questionnaire,		Closed		Leipzig Short Scale for Recording the Sense of Coherence		Leipzig Short Scale for Recording the Sense of Coherence															TQ- psychological	Tinnitus Questionnaire			Psychological distress	Tinnitus-related distress	highest mean score: 16.6	N/A	N/A	N/A	N/A
																		Questionnaire,		Closed		German Questionnaire for Evaluating the Self-Efficacy, Optimism and Pessimism		Evaluating the Self-Efficacy, Optimism and Pessimism Questionnaire (German)															TQ- intrusiveness	Tinnitus Questionnaire			Intrusiveness	Tinnitus intrusiveness	third highest mean score: 9.9 (0 to 100)	N/A	N/A	N/A	N/A
																																							TQ- hearing	Tinnitus Questionnaire			hearing problems	Negative effects on hearing	N/A	N/A	N/A	N/A	N/A
																																							TQ- sleep	Tinnitus Questionnaire			sleep disturbances	Sleep difficulties	N/A	N/A	N/A	N/A	N/A
																																							TQ- somatic	Tinnitus Questionnaire			somatic complaints	Bodily complaints	N/A	N/A	N/A	N/A	N/A
																																							PSQ	Perceived Stress Questionnaire			Perceived stress	General distress	N/A	N/A	N/A	N/A	N/A
																																							PSQ- worries	Perceived Stress Questionnaire			worries	Worries/concerns	N/A	N/A	N/A	N/A	N/A
																																							PSQ- tension	Perceived Stress Questionnaire			tension	Anxiety	highest mean score: 57.2 (0 to 100)	N/A	N/A	N/A	N/A
																																							PSQ- joy	Perceived Stress Questionnaire			joy	Lack of joy	second highest mean score: 51.0 (0 to 100)	N/A	N/A	N/A	N/A
																																							PSQ- demands	Perceived Stress Questionnaire			demands (the demand scale is represented the construct 'stressor').	General distress	third highest mean score: 48.7 (0 to 100)	N/A	N/A	N/A	N/A
																																							PCI	Proactive Coping Inventory (PCI)			Proactive coping	Difficulties coping	N/A	N/A	N/A	N/A	N/A
																																							SOC-L9	Leipzig Short Scale for Recording the Sense of Coherence			Sense of Coherence (comprehensibility, manageability and meaningfulness)	Difficulties coping	N/A	N/A	N/A	N/A	N/A
																																							German Questionnaire for Evaluating the Self-efficacy, Optimism and pessimism	Evaluating the Self-Efficacy, Optimism and Pessimism Questionnaire (German)			Self-efficacy	Difficulties coping	N/A	N/A	N/A	N/A	N/A
32	2	2	1	2	7	Development of the self-efficacy for tinnitus management questionnaire	Smith SL. ; Fagelson, M.	sherri.smith@va.gov	United States	journal article		22; 2011	2001-2010	Primary objective: To develop a valid and reliable questionnaire that clinicians can use to assess tinnitus self-efficacy; Secondary objective: To relate the results of our new measure of tinnitus self-efficacy to other self-report clinical measures used previously that describe hearing difficulties, hyperacusis, tinnitus characteristics, and tinnitus distress.	non-interventional		Observational study	Questionnaire,		Closed	0	Self-Efficacy for Tinnitus Management Questionnaire (SETMQ)	Self-Efficacy for Tinnitus Management Questionnaire		199	Patients		secondary care services	63.3	9.5	27.1-86.6	Male and female	not stated	not stated	not stated	THI = 47.4 (24)	Mild - Severe	none stated	Self-Efficacy for Tinnitus Management Questionnaire (SETMQ)	Self-Efficacy for Tinnitus Management Questionnaire			Routine Tinnitus Management	Ability to ignore	"I can ignore my tinnitus when performing quiet chores such as straightening up a room in my home (factor load: .86)"; I can ignore my tinnitus when I work on a puzzle for fun, such as a crossword puzzle.(factor load: .84); I can ignore my tinnitus when reading in a quiet place.(factor load: .83); I can ignore my tinnitus when working on my favorite hobby.(factor load: .83)	N/A	N/A	N/A	N/A
																		Questionnaire,		Closed		Tinnitus Handicap Inventory (THI)	Tinnitus Handicap Inventory																Self-Efficacy for Tinnitus Management Questionnaire (SETMQ)	Self-Efficacy for Tinnitus Management Questionnaire			Emotional Response	Tinnitus-related distress	"I can manage my stress level when I hear my tinnitus."(factor load: .78); I can manage my frustration when I hear my tinnitus. (factor load: .75); I can manage becoming irritated when I hear my tinnitus. (factor load: .75);	N/A	N/A	N/A	N/A
																		Questionnaire,		Closed		Self-reported questions using Likert scales	Patient-reported numerical rating/visual analogue scales																Self-Efficacy for Tinnitus Management Questionnaire (SETMQ)	Self-Efficacy for Tinnitus Management Questionnaire			Internal Thoughts and Interaction with Others	Negative effects on hearing	"I can carry on a conversation with one other person even when I hear my tinnitus." (factor load: .80) I can carry on a conversation with a small group of people even when I hear my tinnitus. (factor load: .73); I can have a conversation on the telephone even when I hear my tinnitus. (factor load: .72); I can communicate in order to complete my typical work responsibilities even when I hear my ti…	N/A	N/A	N/A	N/A
																		Questionnaire,		Closed		modified version of the Tinnitus Retraining Therapy Intake Form	Author's own																Tinnitus awareness scale	Patient-reported numerical rating scales awareness			tinnitus awareness	Tinnitus awareness	“What percent of your total awake time, over the last month, have you been aware of your tinnitus?” 72.3% of their waking hours	N/A	N/A	N/A	N/A
																		Other (please specify)	Numerical rating scale (100 points)	Closed		Tinnitus Awareness Scale	Patient-reported numerical rating scales awareness																Tinnitus distress scale	Patient-reported numerical rating scales distress			tinnitus distress	Tinnitus-related distress	“What percent of your total awake time, over the last month, have you been annoyed, distressed, or irritated by your tinnitus?” (mean = 44.9) their tinnitus was distressing 45% of the time that they were aware of it (i.e., Tinnitus Distress).	N/A	N/A	N/A	N/A
																		Other (please specify)	Numerical rating scale (100 points)	Closed		Tinnitus Distress Scale	Patient-reported numerical rating scales distress																loudness rating	Patient-reported numerical rating scales tinnitus loudness			loudness	Tinnitus loudness	"On a scale of 0 (very soft) to 10 (very loud), how would you rate the loudness of your tinnitus?" The average loudness rating was 6.8 (SD51.8).	N/A	N/A	N/A	N/A
																		Other (please specify)	Numerical rating scale (100 points)	Closed		Loudness Scale	Patient-reported numerical rating scales tinnitus loudness																Tinnitus Handicap Inventory	Tinnitus Handicap Inventory			self-perceived tinnitus handicap	cannot code	emotional, functional, catastrophic	N/A	N/A	N/A	N/A
																		Other (please specify)	Numerical rating scale (100 points)	Closed		Hearing loss Rating Scale		Patient-reported numerical rating scales hearing loss																					N/A	N/A	N/A	N/A	N/A
																		Other (please specify)	Numerical rating scale (100 points)	Closed		Hyperacusis Rating Scale		Patient-reported numerical rating scales hyperacusis																					N/A	N/A	N/A	N/A	N/A
33	0	2	0	2	4	Perceptions of tinnitus in a group of senior citizens	Sourgen, PM.; Ross E	not stated	South Africa	journal article		45; 1998	not stated	To investigate the perceptions of tinnitus in a group of senior citizens. Subaims: 1. to assess respondents' perception of the auditory characteristics of tinnitus 2. to determine the effect of tinnitus on quality of life 3. to elicit information on the respondents perception of the cause/s of their tinnitus 4. to highlight factors perceived to aggrevate or ameliorate the experience of tinnitus 5…	non-interventional		survey design	Questionnaire,		Closed	0	Tinnitus questionnaire based on an adaptation of The University of Iowa Tinnitus Questionnaire (Stouffer & Tyler, 1990) and the Tinnitus Reaction Questionnaire (Wilson et al., 1991)	Author's own		20	patients		non-clinical	not stated	not stated	not stated but sample grouped in increments between 60-99	Male and female	13.5 (SD: 13.4)	not stated	both	How often tinnitus bothered them: sometimes (45%); often (30%); all the time (25%)	Complete grading scale	none stated	Tinnitus questionnaire based on an adaptation of The University of Iowa Tinnitus Questionnaire (Stouffer & Tyler, 1990) and the Tinnitus Reaction Questionnaire (Wilson et al., 1991)	Author's own			auditory perceptual characteristics of tinnitus	cannot code	loudness (mean 5.7), , how often bothered by tinnitus (sometimes 45%, often 30%, all the time 25%)	N/A	N/A	N/A	N/A
																																											Effects of tinnitus on Quality of life	Quality of life (tinnitus)	LIFESTYLE: Freq with which tinnitus affected various life functions/situations: avoid noisy situations (65%), ability to relax (65%), difficulty following a conversation (55%), ability to concentrate (50%), caused tiredness (40%) Sleep Difficulties (57% of male)	N/A	N/A	N/A	N/A
																																											Emotional reaction to tinnitus	Tinnitus-related distress	frustrated (70%), Tense (60%), Irritable (55%), Depressed (50%), Avoid noisy situations (65%), Ability to relax (65%), Difficulty following a conversation (55%)	N/A	N/A	N/A	N/A
																																											Effects of tinnitus on general health	Physical health problems	EFFECTS of TINNITUS on GENERAL HEALTH: 23% indicated that tinnitus caused them to feel dizzy	N/A	N/A	N/A	N/A
																																											Factors that agravate tinnitus	cannot code	being in a noisy place (45%), emotional/mental stress (40%),	N/A	N/A	N/A	N/A
34	2	2	0	0	4	Psychosomatic stress factors in compensated and decompensated tinnitus	Stobik, C., Weber, R.K., Münte, T.F., Frommer, J.	joerg.frommer@medizin.uni-madgeburg.de	Germany	journal article		2003	June 1999 - November 2000	to analyze the influence of psychosocial and somatic factors in subjective tinnitus	non-interventional			Questionnaire,		Closed	0	TQ German Version	Tinnitus Questionnaire (German)		53	Patients		primary care services	49.7	tinn 6.8	37-63	Male and female	not stated	not stated	not stated	25 high, 28 middle using the TQ		none stated	Visual Analogue Scale	Patient-reported numerical rating scales tinnitus loudness			loudness	Tinnitus loudness	negative influence on daily activity; loudness; annoyance	N/A	N/A	N/A	N/A
																				Closed		SCl 90 R		Symptom Checklist															Visual Analogue Scale	Patient-reported numerical rating scales annoyance			annoyance	Annoyance	N/A	N/A	N/A	N/A	N/A
																				Closed		FKV (Questionnaire for processing of the disease)		Fragebogen zur Krankheitsverarbeitung															Visual Analogue Scale	Patient-reported numerical rating scales effect on life			daily life activities	Health-related quality of life	N/A	N/A	N/A	N/A	N/A
																				Closed		IIP-D (Questionnaire for interpersonal problems)		Inventory of Interpersonal Problems															Structured interview	Structured Interview			influence on sleep	Sleep difficulties	frequency of sleep problems (graded by number of nights per week)	N/A	N/A	N/A	N/A
																				Closed		PAT (Questionnaire for social data)		Sozialdatenfragebogen (social data q)															Structured interview	Structured Interview			concentration problems	Concentration difficulties	frequency of concentration problems	N/A	N/A	N/A	N/A
																		Interviews	Response options on a Likert scale 3-5 options	Closed		Structured interview		Structured Interview															Structured interview	Structured Interview			loss of joy	Lack of joy	frequency of loss of joy	N/A	N/A	N/A	N/A
																		Other (please specify)	Visual Analogue Scale	Closed		Visual Analogue Scale		Patient-reported numerical rating/visual analogue scales															Structured interview	Structured Interview			distractibility	Concentration difficulties	frequency of being distracted by tinnitus	N/A	N/A	N/A	N/A
																																							Structured interview	Structured Interview			tinnitus-related quality of life	Quality of life (tinnitus)	comparing before and after tinnitus	N/A	N/A	N/A	N/A
																																							TQ German Version subscale	Tinnitus Questionnaire (German)			emotional disturbance	Tinnitus-related distress	no examples given	N/A	N/A	N/A	N/A
																																							TQ German Version subscale	Tinnitus Questionnaire (German)			cognitive disturbance	Cognitive difficulties	no examples given	N/A	N/A	N/A	N/A
																																							TQ German Version subscale	Tinnitus Questionnaire (German)			mental disturbance	Tinnitus-related distress	no examples given	N/A	N/A	N/A	N/A
																																							TQ German Version subscale	Tinnitus Questionnaire (German)			awareness of tinnitus	Tinnitus awareness	no examples given	N/A	N/A	N/A	N/A
																																							TQ German Version subscale	Tinnitus Questionnaire (German)			hearing problems	Negative effects on hearing	no examples given	N/A	N/A	N/A	N/A
																																							TQ German Version subscale	Tinnitus Questionnaire (German)			sleep problems	Sleep difficulties	no examples given	N/A	N/A	N/A	N/A
																																							TQ German Version subscale	Tinnitus Questionnaire (German)			somatoformic disturbance	Distress from bodily complaints	no examples given	N/A	N/A	N/A	N/A
35	2	2	0	2	6	Evidence of psychosomatic influences in compensated and decompensated tinnitus	Stobik, C.; Weber, RK.; Munte, TF.; Walter, M.; Frommer, J.	marc.walter@pukbasel.ch	Germany	journal article		44; 2005	June 1999 - Nov 2000	To elucidate the interactions of somatic and psychosocial factors in compensated and decompensated tinnitus patients, as encountered in a rehabilitation hospital. In particular, to what extent somatic factors might contribute to the decompensation of tinnitus.	non-interventional		not stated	Questionnaire,		Closed	1	Tinnitus Questionnaire (Goebel & Hiller, 1998)	Tinnitus Questionnaire (German)		53	Patients		secondary care services	49.7	6.8	37-63	Male and female	6.5	not stated	not stated	TQ score 0-46 (compensated) n=28; 47-84 (decompensated) n=25	Complete grading scale	none stated	Tinnitus Questionnaire	Tinnitus Questionnaire (German)			overall patient stress and severity of tinnitus	cannot code	Mean score 47.9	N/A	N/A	N/A	N/A
																		Interviews	Questionnaire	Open		Structured interview medical history with elements of Goebel's Structured Tinnitus Interview (STI, Goebel & Hiller 1998) and study-specific items	Author's own																Tinnitus Questionnaire - emotion	Tinnitus Questionnaire (German)			Emotional stress	Tinnitus-related distress	highest Mean 14.9	N/A	N/A	N/A	N/A
																		Other (please specify)	Visual Analogue Scale	Closed		Patient-reported numerical rating scales tinnitus loudness	Patient-reported numerical rating scales tinnitus loudness																Tinnitus Questionnaire - cognitive	Tinnitus Questionnaire (German)			Cognitive stress	Cognitive difficulties	third highest mean 8.1	N/A	N/A	N/A	N/A
																		Other (please specify)	Visual Analogue Scale	Closed		Patient-reported numerical rating scales tinnitus-related disturbances	Patient-reported numerical rating scales tinnitus-related disturbances																Tinnitus Questionnaire - obtrusiveness	Tinnitus Questionnaire (German)			Tinnitus obtrusiveness	Tinnitus awareness	Second highest mean 10.7	N/A	N/A	N/A	N/A
																		Other (please specify)	Visual Analogue Scale	Closed		Patient-reported numerical rating scales effect on life	Patient-reported numerical rating scales effect on life																Tinnitus Questionnaire - auditory	Tinnitus Questionnaire (German)			Auditory problems	Negative effects on hearing	N/A	N/A	N/A	N/A	N/A
																		Questionnaire,		Closed		Symptom Checklist (SCL-90-R, Franke 1995)		Symptom Checklist															Tinnitus Questionnaire sleep	Tinnitus Questionnaire (German)			Sleep disorders	Sleep difficulties	N/A	N/A	N/A	N/A	N/A
																		Questionnaire,		Closed		Disorder-coping questionnaire (FKV, Muthny 1989)		Disorder-coping questionnaire															Tinnitus Questionnaire - somatic	Tinnitus Questionnaire (German)			Somatic complaints	Bodily complaints	N/A	N/A	N/A	N/A	N/A
																		Questionnaire,		Closed		Inventory of Interpersonal Problems (IIP-D, Horowitz et al. 2000)		Inventory of Interpersonal Problems															Structured interview medical history	Author's own	Sleep impariment	Sleep difficulties			impaired in their ability to sleep	N/A	N/A	N/A	N/A
																																							Structured interview medical history	Author's own	impairment of concentration	Concentration difficulties			impaired in their capacity to concentrate	N/A	N/A	N/A	N/A
																																							Structured interview medical history	Author's own	refrain from activities	Negative impact on activities			avoided otherwise enjoyable activities, more restricted in their activities	N/A	N/A	N/A	N/A
																																							Structured interview medical history	Author's own	ability to divert attention from their tinnitus	Ability to ignore			less able to divert their attention from their tinnitus	N/A	N/A	N/A	N/A
																																							Structured interview medical history	Author's own	ability to mask their tinnitus sound	cannot code			less ability to mask their tinnitus with background sounds	N/A	N/A	N/A	N/A
																																							Structured interview medical history	Author's own	changes for loud background noise	cannot code			a frequent aggravation of the disorder in the presence of loud noises	N/A	N/A	N/A	N/A
																																							Structured interview medical history	Author's own	Changes in life due to tinnitus	Quality of life (tinnitus)			Impairments in quality of life, reduced stress tolerance, psychosocial withdrawal	N/A	N/A	N/A	N/A
36	N/A	N/A	N/A	N/A	N/A	Difficulties experienced by tinnitus sufferers	Tyler, R. S. Baker, L.J.	not stated	United Kingdom	journal article		1983-05-01	not stated	To elucidate some of the more serious problems experienced by tinnitus sufferers, and to demonstrate a useful technique to discover the nature of these problems for a given individual	non-interventional		not stated	Other (please specify)	Survey - one question to list of difficulties	Open	2	"Please make a list of the difficulties which you have as a results of your tinnitus. List them in order of importance, starting with the biggest difficulties. Write down as many of them as you can".	Tinnitus Problem Questionnaire		72	Patients		general public	60.7	13.1	27-88	Male and female	a few months to 60 years	not stated	not stated	not stated	not stated	none stated	Please make a list of the difficulties which you have as a results of your tinnitus. List them in order of importance, starting with the biggest difficulties. Write down as many of them as you can.	Tinnitus Problem Questionnaire	Understanding television	Negative effects on hearing	N/A			N/A	N/A	N/A	N/A
																																							Please make a list of the difficulties which you have as a results of your tinnitus. List them in order of importance, starting with the biggest difficulties. Write down as many of them as you can.	Tinnitus Problem Questionnaire	Understanding speech	Negative effects on hearing	N/A
																																							Please make a list of the difficulties which you have as a results of your tinnitus. List them in order of importance, starting with the biggest difficulties. Write down as many of them as you can.	Tinnitus Problem Questionnaire	Listening to radio	Negative effects on hearing	N/A
																																							Please make a list of the difficulties which you have as a results of your tinnitus. List them in order of importance, starting with the biggest difficulties. Write down as many of them as you can.	Tinnitus Problem Questionnaire	Appreciation of music	Negative effects on hearing	N/A
																																							Please make a list of the difficulties which you have as a results of your tinnitus. List them in order of importance, starting with the biggest difficulties. Write down as many of them as you can.	Tinnitus Problem Questionnaire	Use of telephone	Negative effects on hearing	N/A
																																							Please make a list of the difficulties which you have as a results of your tinnitus. List them in order of importance, starting with the biggest difficulties. Write down as many of them as you can.	Tinnitus Problem Questionnaire	Localization of sounds	Negative effects on hearing	N/A
																																							Please make a list of the difficulties which you have as a results of your tinnitus. List them in order of importance, starting with the biggest difficulties. Write down as many of them as you can.	Tinnitus Problem Questionnaire	Listening to environmental sounds (doorbell, telephone bell)	Negative effects on hearing	N/A
																																							Please make a list of the difficulties which you have as a results of your tinnitus. List them in order of importance, starting with the biggest difficulties. Write down as many of them as you can.	Tinnitus Problem Questionnaire	Getting to sleep	Sleep difficulties	N/A
																																							Please make a list of the difficulties which you have as a results of your tinnitus. List them in order of importance, starting with the biggest difficulties. Write down as many of them as you can.	Tinnitus Problem Questionnaire	Persistence of tinnitus	Tinnitus awareness	N/A
																																							Please make a list of the difficulties which you have as a results of your tinnitus. List them in order of importance, starting with the biggest difficulties. Write down as many of them as you can.	Tinnitus Problem Questionnaire	Worse upon awakening in morning	cannot code	N/A
																																							Please make a list of the difficulties which you have as a results of your tinnitus. List them in order of importance, starting with the biggest difficulties. Write down as many of them as you can.	Tinnitus Problem Questionnaire	Avoid noisy situation	Difficulties coping	N/A
																																							Please make a list of the difficulties which you have as a results of your tinnitus. List them in order of importance, starting with the biggest difficulties. Write down as many of them as you can.	Tinnitus Problem Questionnaire	Withdraw, avoid friends	Negative impact on social life	N/A
																																							Please make a list of the difficulties which you have as a results of your tinnitus. List them in order of importance, starting with the biggest difficulties. Write down as many of them as you can.	Tinnitus Problem Questionnaire	Avoid quiet situations	Difficulties coping	N/A
																																							Please make a list of the difficulties which you have as a results of your tinnitus. List them in order of importance, starting with the biggest difficulties. Write down as many of them as you can.	Tinnitus Problem Questionnaire	Family problems	Negative impact on relationships	N/A
																																							Please make a list of the difficulties which you have as a results of your tinnitus. List them in order of importance, starting with the biggest difficulties. Write down as many of them as you can.	Tinnitus Problem Questionnaire	Interferes with work	Negative impact on work activities	N/A
																																							Please make a list of the difficulties which you have as a results of your tinnitus. List them in order of importance, starting with the biggest difficulties. Write down as many of them as you can.	Tinnitus Problem Questionnaire	Requiring noisy situations	Difficulties coping	N/A
																																							Please make a list of the difficulties which you have as a results of your tinnitus. List them in order of importance, starting with the biggest difficulties. Write down as many of them as you can.	Tinnitus Problem Questionnaire	Requiring quiet situations	Difficulties coping	N/A
																																							Please make a list of the difficulties which you have as a results of your tinnitus. List them in order of importance, starting with the biggest difficulties. Write down as many of them as you can.	Tinnitus Problem Questionnaire	Learning to drive	Negative impact on individual activities	N/A
																																							Please make a list of the difficulties which you have as a results of your tinnitus. List them in order of importance, starting with the biggest difficulties. Write down as many of them as you can.	Tinnitus Problem Questionnaire	Explaining tinnitus to others	Need for knowledge	N/A
																																							Please make a list of the difficulties which you have as a results of your tinnitus. List them in order of importance, starting with the biggest difficulties. Write down as many of them as you can.	Tinnitus Problem Questionnaire	Dependence on drugs	Physical health problems	N/A
																																							Please make a list of the difficulties which you have as a results of your tinnitus. List them in order of importance, starting with the biggest difficulties. Write down as many of them as you can.	Tinnitus Problem Questionnaire	Pain/headaches	Bodily complaints	N/A
																																							Please make a list of the difficulties which you have as a results of your tinnitus. List them in order of importance, starting with the biggest difficulties. Write down as many of them as you can.	Tinnitus Problem Questionnaire	Giddiness/imbalance/fuzzy head	Physical health problems	N/A
																																							Please make a list of the difficulties which you have as a results of your tinnitus. List them in order of importance, starting with the biggest difficulties. Write down as many of them as you can.	Tinnitus Problem Questionnaire	General ill-health	Physical health problems	N/A
																																							Please make a list of the difficulties which you have as a results of your tinnitus. List them in order of importance, starting with the biggest difficulties. Write down as many of them as you can.	Tinnitus Problem Questionnaire	Ineffectiveness of drugs	Physical health problems	N/A
																																							Please make a list of the difficulties which you have as a results of your tinnitus. List them in order of importance, starting with the biggest difficulties. Write down as many of them as you can.	Tinnitus Problem Questionnaire	Tiredness	Feeling tired	N/A
																																							Please make a list of the difficulties which you have as a results of your tinnitus. List them in order of importance, starting with the biggest difficulties. Write down as many of them as you can.	Tinnitus Problem Questionnaire	Ineffectiveness of tinnitus masker	cannot code	N/A
																																							Please make a list of the difficulties which you have as a results of your tinnitus. List them in order of importance, starting with the biggest difficulties. Write down as many of them as you can.	Tinnitus Problem Questionnaire	Despair, frustration, depression	Tinnitus-related distress	N/A
																																							Please make a list of the difficulties which you have as a results of your tinnitus. List them in order of importance, starting with the biggest difficulties. Write down as many of them as you can.	Tinnitus Problem Questionnaire	Annoyance, irritation, inability to relax	Annoyance	What it's like to hear it all the time
																																							Please make a list of the difficulties which you have as a results of your tinnitus. List them in order of importance, starting with the biggest difficulties. Write down as many of them as you can.	Tinnitus Problem Questionnaire	Concentration, confusion	Concentration difficulties	N/A			N/A	N/A	N/A	N/A
																																							Please make a list of the difficulties which you have as a results of your tinnitus. List them in order of importance, starting with the biggest difficulties. Write down as many of them as you can.	Tinnitus Problem Questionnaire	Insecurity, fear, worry	Worries/concerns	N/A			N/A	N/A	N/A	N/A
																																							Please make a list of the difficulties which you have as a results of your tinnitus. List them in order of importance, starting with the biggest difficulties. Write down as many of them as you can.	Tinnitus Problem Questionnaire	Considered suicide	Suicidal thoughts	N/A			N/A	N/A	N/A	N/A
37	2	2	0	2	6	Tinnitus: distinguishing between subjectively perceived loudness and tinnitus-related distress	Wallhausser-Franke, E.; Brade J.; Balkenhol T.; D'Amelio R.	elisabeth.wallhaeusser@medma.uni-heidelberg.de	Germany	journal article		2012-04-01	During September of 2010	To define factors that differentially influence subjectively perceived tinnitus loudness and tinnitus-related distress.	non-interventional		not stated	Questionnaire,		Closed	0	Numeric Rating Scale (T-NRS) (module of MTQ)	Patient-reported numerical rating/visual analogue scales		4705	Patients		secondary care services	58.63	11.76	18-94	Male and female	<= 12 months (n=1.3); <12 months and <=5 (n=14.7); > 5y (n=84)	not stated	not stated	not stated	not stated	none stated	Numerican rating scale (T-NRS) (module of MTQ)	Patient-reported numerical rating/visual analogue scales			Loudness of tinnitus	Tinnitus loudness	N/A	N/A	N/A	N/A	N/A
																		Questionnaire,		Closed		Psychometrically validated brief of the tinnitus questionnaire (MTQ)	Tinnitus Questionnaire (short version)																Psychometrically validated brief version of the tinnitus questionnaire (MTQ)	Tinnitus Questionnaire (short version)			Tinnitus-related distress	Tinnitus-related distress	Most noteworthy was the high incidence of elevated PHQ scores in the group with severe tinnitus-related distress.	N/A	N/A	N/A	N/A
																		Questionnaire,		Closed		Patient Health Questionnaire (PHQ) (module of MTQ)		Patient Health Questionnaire															Patient Health Questionnaire (PHQ) - 9	Patient Health Questionnaire			Depressitivity	Depressive symptoms	The predominant characteristic in the group with severe tinnitus-related distress was the high prevalence of psychologically relevant symptoms as indicated by elevated scores in the PHQ scales.	N/A	N/A	N/A	N/A
																		Questionnaire,		Closed		Tinnitus Questionnaire (MTQ)	Tinnitus Questionnaire																Patient Health Questionnaire (PHQ) - GAD-7	Patient Health Questionnaire			Anxiety	Anxiety	N/A	N/A	N/A	N/A	N/A
																																							Patient Health Questionnaire (PHQ)-15	Patient Health Questionnaire			Somatic symptom severity	Bodily complaints	N/A	N/A	N/A	N/A	N/A
																																							Tinnitus Questionnaire (MTQ)	Tinnitus Questionnaire			awareness of tinnitus	Tinnitus awareness	N/A	N/A	N/A	N/A	N/A
																																							Numerican rating scale (T-NRS) (module of MTQ)	Patient-reported numerical rating/visual analogue scales			localization of tinnitus	Tinnitus location	In addition the variables binaural/central tinnitus localization as well as somatic symptom severity and pain had significant influence	N/A	N/A	N/A	N/A
																																							Psychometrically validated brief version of the tinnitus questionnaire (MTQ)	Tinnitus Questionnaire (short version)			chronic comorbidities	Bodily complaints	More than 50% of the sample reported somatic comorbidities.	N/A	N/A	N/A	N/A
																																							Patient Health Questionnaire (PHQ) - 10	Patient Health Questionnaire			sleep quality	Sleep difficulties	The majority had difficulties in initiating or maintaining sleep, and overall benefit from hearing aids was lower than average.	N/A	N/A	N/A	N/A
																																							Patient Health Questionnaire (PHQ) - GAD-8	Patient Health Questionnaire						N/A	N/A	N/A	N/A
																																							Patient Health Questionnaire (PHQ)-16	Patient Health Questionnaire						N/A	N/A	N/A	N/A
38	2	2	0	2	6	Psychological comorbidity in patients with chronic tinnitus: analysis and comparison with chronic pain, asthma or atopic dermatitis patients	Zirke, N. Seydel, C. Szczepek, A.J. Olze, H. Haupt, H. Mazurek,B	birgit.mazurek@charite.de	Germany	journal article		22; 2013	Nov 2008 to Nov 2009	we searched for psychological disorders in patients with chronic tinnitus, estimated their extent and compared the results to those obtained from patients with chronic pain disorders, chronic asthma and atopic dermatitis	non-interventional		not stated	Other (please specify)	survey	Closed	0	International statistic classification of diseases and related health problems (ICD-10)		International statistic classification of diseases and related health problems	300	Patients		secondary care services	46	14	16-79	Male and female	not stated	not stated	not stated	not stated	not stated	none stated	ICD-10	International statistic classification of diseases and related health problems			Psychological comorbidity	Anxiety	25 % of tinnitus patients have neurotic, stress-related and somatoform disorders and 23.5 % have affective disorders. Patients with decompensated tinnitus had more psychological disorders (77 %) than patients with compensated tinnitus (39.5 %, p <0.0001). Patients with decompensated tinnitus were diagnosed more frequently with affective disorders (35 out of 90 diagnoses)	N/A	N/A	N/A	N/A
																		Questionnaire,		Closed		Berlin mood questionnaire (BMQ)		Berlin mood questionnaire															Berlin mood questionnaire (BMQ)	Berlin mood questionnaire			Subjective mood	Mood states	Patients with chronic tinnitus scored higher Subjective mood for than patients wth chronic pain, asthma or atopic dermatis	N/A	N/A	N/A	N/A
																		Questionnaire,		Closed		Leipzig short scale for recording the sense of coherence (SOC-L9)		Leipzig Short Scale for Recording the Sense of Coherence															Berlin mood questionnaire (BMQ)	Berlin mood questionnaire			Anger	Anger	Patients with chronic tinnitus scored lower for anger than patients wth chronic pain, asthma or atopic dermatis. The scores for anger and PSQ were even higher in patients with decompensated tinnitus than in patients with pain (p < 0.05 and p< 0.01).	N/A	N/A	N/A	N/A
																		Questionnaire,		Closed		perceived stress questionnaire (PSQ)		Perceived Stress Questionnaire															Berlin mood questionnaire (BMQ)	Berlin mood questionnaire			Anxious depression	Anxiety	Patients with chronic tinnitus scored lower for Anxious depression than patients wth chronic pain, asthma or atopic dermatis	N/A	N/A	N/A	N/A
																		Questionnaire,		Closed		subscale ‘exhaustion’ of the Giessen physical complaints inventory (GPCI)		Giessen physical complaints inventory															SOC-L9 - one-dimensional instrument consisting of 9 items and is the short version of Antonovsky’s SOC	Leipzig Short Scale for Recording the Sense of Coherence			Sense of Coherence (comprehensibility, manageability and meaningfulness)	Difficulties coping	Patients with chronic tinnitus scored higher for sense of Coherence than patients wth chronic pain, astha or atopic dermatis	N/A	N/A	N/A	N/A
																		Questionnaire,		Closed		Tinnitus questionnaire (TQ)	Tinnitus Questionnaire																PSQ (30 items) - (low level perceived stress 0,45)	Perceived Stress Questionnaire			General distress	General distress	Patients with chronic tinnitus scored lower for perceived stress than patients wth chronic pain, asthma or atopic dermatis	N/A	N/A	N/A	N/A
																																							subscale ‘exhaustion’ of the Giessen physical complaints inventory (GPCI) - subdomain "exhaustion"	Giessen physical complaints inventory			Sleep	Sleep difficulties	Patients with tinnitus had lower sleep disturbance than the patients of the other disease groups.	N/A	N/A	N/A	N/A
																																							Tinnitus questionnaire (TQ)	Tinnitus Questionnaire			Permanent annoyance (TQ>47	Annoyance	75 patients (25 %) with decompensated tinnitus. We found a weak, but signiﬁcant correlation between the TQ score and the mean hearing loss (left side: r = 0.26, p \ 0.0001; right side: r = 0.245, p \ 0.0001). The TQ score also correlated with the tinnitus loudness (left side: r = 0.204, p \ 0.01; right side: r = 0.318, p \ 0.0001). Patients with decompensated tinnitus had signiﬁcantly worse test …	N/A	N/A	N/A	N/A
39	2	2	2	2	8	Tinnitus: effects on the patient and partner	Toft, S.	not stated	United Kingdom	postgraduate dissertation		2003-06-01	not stated	To investigate the impact of tinnitus on the patient and their partner, in terms of psychological distress. To consider the influence of tinnitus severity, gender, hearing impairment, relationship quality and coping style.	non-interventional			Questionnaire,		Closed	0	Golombok Rust Inventory of Marital State (GRIMS; Quality of relationship range of score 0 -84 high score = Severe relationship difficulties		Golombok Rust Inventory of Marital State	27	Patients and significant others		secondary care services	55.23	11.5	34-74	Male and female	less than 12 months to 45 years	not stated	not stated	from slight to catasphrophic as graded by THI 38.73 rang 2 - 8 4	not stated	none stated	Golombok Rust Inventory of Marital State (GRIMS)	Golombok Rust Inventory of Marital State			Marital quality	Negative impact on relationships	Areas considered by items on the questionnaire, include: satisfaction, communication, shared interests, respect and trust	Quality of relationship	Negative impact on relationships	GRIMS Quality of relationship	Golombok Rust Inventory of Marital State
																		Questionnaire,		Closed		General Health Questionnaire 30-item GHQ30 Level of psychological distress high score = High level of distress		General Health Questionnaire	22 partners				54.35	13.04	30 -78	Male and female	not applicable	not stated	not stated	not applicable	not stated		General Health Questionnaire	General Health Questionnaire			Anxiety and depression	Anxiety	N/A	Sleep pattern	Sleep difficulties
																		Questionnaire,		Closed		Coping Inventory for Stressful Situations (CISS Typical coping strategies engaged in; Task emotion avoidant: 16-80 Distraction: 8 - 4 0 Social diversion: 5- 25) high score = Greater use of a coping strategy		Coping Inventory for Stressful Situations															The Coping Inventory for Stressful Situations	Coping Inventory for Stressful Situations			Avoidant-oriented coping	Difficulties coping	Patients with severe tinnitus tended to use avoidant-oriented coping more than patients with mild tinnitus.	Communication	Nehative effects on hearing	Brief questionanire	Author's own
																		Questionnaire,		Closed		Tinnitus Handicap Inventory (THI)	Tinnitus Handicap Inventory																The Coping Inventory for Stressful Situations	Coping Inventory for Stressful Situations			Emotion-oriented coping	Difficulties coping	Patients with severe tinnitus also tended to use emotion-oriented coping more than those with mild tinnitus and used task-oriented coping less.	Emotional Health	General distress	Brief questionanire	Author's own
																		Questionnaire,		Closed		Brief Patient Questionnaire (Demographic details, perception of tinnitus, hearing loss, etc. (developed by author)	Author's own	author's own															The Brief patient questionnaire	Author's own			Hearing difficulty	Negative effects on hearing	N/A	Relationship	Negative impact on relationships	Brief questionanire	Author's own
																		Questionnaire,		Closed		Brief Partner Questionnaire how partners tinnitus and hearing loss effects them (developed by author)	Author's own	author's own															The Brief patient questionnaire	Author's own			Tinnitus awareness	Tinnitus awareness	N/A	Social Life	Negative impact on social life	Brief questionanire	Author's own
																																							The Brief patient questionnaire	Author's own			Triggers to tinnitus	Tinnitus awareness	Constant awareness was reported by 36% of patients 36% of patients, 18% were aware of it at night and 18% during quiet times.	Physical Health	Physical health problems	Brief questionanire	Author's own
																																							The Tinnitus Handicap Inventory	Tinnitus Handicap Inventory			The impact of tinnitus on daily living	Quality of life (tinnitus)	N/A	Mood	Mood states
																																											sleep	Sleep difficulties	Difficulties getting and remaining asleep (3) Lethargy causes problems at work (1) Disrupted sleep pattern affects partner (2)	N/A	N/A	N/A	N/A
																																											mood	Mood states	Causes depression (3) Leads to irritation / annoyance (4) Mood affects relationship with partner (1)	N/A	N/A	N/A	N/A
																																											Appetite	Loss of appetite	Lost appetite (1)	N/A	N/A	N/A	N/A
																																											Concentration	Concentration difficulties	Makes reading difficult (1) Revision is made difficult (1)	N/A	N/A	N/A	N/A
																																											Need Speech Repeated	Frustration	Family become annoyed by this (2) Leads to own frustration	N/A	N/A	N/A	N/A
																																											Leisure	Negative impact on social life	Unable to engage in hobby (1	N/A	N/A	N/A	N/A
40	1	2	2	2	7	Tinnitus: assessment of quality of life and cost effectiveness	Maes, I. H. L.		Netherlands	postgraduate dissertation		2014 (march)		The aim of the thesis as a whole :The general objective of this thesis is to evaluate the effects of tinnitus on health-related quality of life and costs. Furthermore, the effects of a specialized, stepped-care cognitive behavioral treatment were compared to care as usual.							0				40	Patients		secondary care services	56 all patients over 18	11.4		Male and female	not stated	not stated	not stated	46.2 mean as measured by the TQ	Moderate (no SD)	none stated								N/A	N/A	N/A	N/A
														The stated aim of chapter 6 The aim of this study is to explore whether emotions, activities and social interactions in daily life of patients with tinnitus are different from a population based sample. Furthermore, the association between effects of tinnitus severity and the level of positive affect, negative affect, physical complaints, activity and social interactions in daily life is examined.	non-interventional			Questionnaire,		Closed		The Hospital Anxiety and Depression Scale (HADS)		Hospital Anxiety and Depression scale															The Hospital Anxiety and Depression Scale (HADS)	Hospital Anxiety and Depression scale			severity of anxiety and depressive complaints	Anxiety	N/A	N/A	N/A	N/A	N/A
																		Questionnaire,		Closed		Tinnitus Questionnaire (TQ). Dutch version	Tinnitus Questionnaire (Dutch)																Tinnitus Questionnaire (TQ). Dutch version	Tinnitus Questionnaire (Dutch)			Tinnitus burden and severity	cannot code	N/A	N/A	N/A	N/A	N/A
																		Questionnaire,	Experience Sampling Method Uses a digitized wrist watch or pager and a pocket sized question booklet.PDA ot smart phone can be used.In this study we used the PsyMate (www.psymate.eu), a small user-friendly device programmed to generate beeps (and vibrations) at unpredictable moments of the day between 7.30h and 22.30h over 6 consecutive days. Subjects use a touch screen to fill out the questions …	Closed		The Booklet for the ESM		Experience Sampling Method															Experience Sampling Method	Experience Sampling Method			Tinnitus intensity	Tinnitus loudness	when tinnitus intensity is experienced as more severe, there is a concomitant increase in other physical symptoms, i.e. pain and fatigue. In addition, more severe tinnitus is accompanied by more negative and less positive mood.	N/A	N/A	N/A	N/A
																																							Experience Sampling Method	Experience Sampling Method			Tired	Feeling tired	With regard to physical complaints, patients with tinnitus reported, as expected, significantly more tinnitus but also more pain than participants from the population based sample. They also reported being more tired and sick	N/A	N/A	N/A	N/A
																																							Experience Sampling Method	Experience Sampling Method			pain	Pain	With regard to physical complaints, patients with tinnitus reported, as expected, significantly more tinnitus but also more pain than participants from the population based sampleThey also reported being more tired and sick	N/A	N/A	N/A	N/A
																																							Experience Sampling Method	Experience Sampling Method			Sick	Physical health problems	With regard to physical complaints, patients with tinnitus reported, as expected, significantly more tinnitus but also more pain than participants from the population based sampleThey also reported being more tired and sick	N/A	N/A	N/A	N/A
																																							Experience Sampling Method	Experience Sampling Method			Feeling Cheerful	Lack of joy	Compared to subjects from a general population sample, patients with tinnitus felt more anxious and insecure and less cheerful, energetic, relaxed and satisfied.	N/A	N/A	N/A	N/A
																																							Experience Sampling Method	Experience Sampling Method			relaxed	Difficulties relaxing	N/A	N/A	N/A	N/A	N/A
																																							Experience Sampling Method	Experience Sampling Method			satisfied	General distress	N/A	N/A	N/A	N/A	N/A
																																							Experience Sampling Method	Experience Sampling Method			Energetic	Feeling tired	N/A	N/A	N/A	N/A	N/A
																																							Experience Sampling Method	Experience Sampling Method			Feeling insecure	Change in sense of self	N/A	N/A	N/A	N/A	N/A
																																							Experience Sampling Method	Experience Sampling Method			Feeling Anxious	Anxiety	N/A	N/A	N/A	N/A	N/A
																																							Experience Sampling Method	Experience Sampling Method			Emotional complaints	General distress	N/A	N/A	N/A	N/A	N/A
41	1	2	0	2	5	Investigation of the perception of tinnitus severity, tinnitus loudness and individual locus of control	McMullen, AF.	not stated	United States	postgraduate dissertation		2001	not stated	To investgate whether there is a significant relationship between an individual's perception of tinnitus severity and loudness and his/her locus of control.	non-interventional	cross-sectional study	not stated	Questionnaire,		Closed	0	Tinnitus Handicap Inventory	Tinnitus Handicap Inventory		86	Patients		secondary care services	71.56	not stated	53-86	Male and female	16.9 years	both	not stated	THI 14.9	Mild (no SD)	none stated	THI - global score	Tinnitus Handicap Inventory			Severity	cannot code	N/A	N/A	N/A	N/A	N/A
																		Other (please specify)	Visual Analogue Scale	Closed		Loudness Perception	Patient-reported numerical rating scales tinnitus loudness																Visual Analogue Scale	Patient-reported numerical rating scales tinnitus loudness			Tinnitus loudness perception	Tinnitus loudness	N/A	N/A	N/A	N/A	N/A
																		Questionnaire,		Closed		Multidimensional Health Locus of Control		Multidimensional Health Locus of Control																						N/A	N/A	N/A	N/A
42	1	2	0	0	3	Characteristics of the tinnitus and hyperacusis in normal hearing individuals	Daila, U.	daila_urnau@yahoo.com.br	Brazil	journal article		Out/nov/dec 2011	may-jul 2010	Analyze the characteristics of tinnitus and hyperacusis in normal hearing individuals with associated complaints of tinnitus and hyperacusis.	non-interventional		"cross-sectional study"	Questionnaire,		Closed	0	Brazilian Tinnitus Handicap Inventory	Tinnitus Handicap Inventory (Brazilian)		25	Patients		secondary care services	not reported		21-70y	Male and female	not stated	not stated	not stated	mean non stated; THI subdivided in Slight (M 2, F 3); mild (M 7, F 4); moderate (F 6); severe (F 2); Catastrophic (F 1)	Complete grading scale	Hyperacusis	Brazilian Tinnitus Handicap Inventory	Tinnitus Handicap Inventory (Brazilian)			severity of tinnitus	cannot code	N/A	N/A	N/A	N/A	N/A
																		Questionnaire,		Closed		Own questionnaire about hyperacusis		author's own															Own questionnaire about hyperacusis	Author's own			sounds considered uncomfortable	Reduced sound tolerance	ring bell, police, door closing	N/A	N/A	N/A	N/A
																																							Own questionnaire about hyperacusis	Author's own			sensations in the presence of such sounds	cannot code	irritation, anxiety, need to move away, fear	N/A	N/A	N/A	N/A
																																							Own questionnaire about hyperacusis	Author's own			difficulty understanding speech in noise	Negative effects on hearing	N/A	N/A	N/A	N/A	N/A
																																							Own questionnaire about hyperacusis	Author's own			use of auricular protection	Difficulties coping	the use and the time of use (<1min, 1-5min, 5-10min, >10min)	N/A	N/A	N/A	N/A
43	N/A	N/A	N/A	N/A	N/A	A tinnitus problem questionnaire in a Clinic Population	Sanchez, L.; Stephens, D.	not stated	Wales, United Kingdom	journal article		1997-06-01	1986-1991	To investigate difficulties associated with tinnitus in a large sample using an open-ended, problem-based questionnaire.	non-interventional			Other (please specify)	Survey - one question list of difficulties	Open	2	Tinnitus Problems Questionnaire (TPQ; Tyler and Baker, 1983)	Tinnitus Problem Questionnaire		436	Patients		secondary care services	57.1		14-92	Male and female	7.21 (range: 1 mth -70; median: 3)	not stated	not stated	not stated	not stated	none stated	Please make a list of the difficulties which you have as a results of your tinnitus. List them in order of importance, starting with the biggest difficulties. Write down as many of them as you can.	Tinnitus Problem Questionnaire	hearing difficulties	Negative effects on hearing			23.5% - Understanding speech, Hearing problems, Understanding television, Understanding speech in noise, distortion, Telephone difficulties	N/A	N/A	N/A	N/A
																																							Please make a list of the difficulties which you have as a results of your tinnitus. List them in order of importance, starting with the biggest difficulties. Write down as many of them as you can.	Tinnitus Problem Questionnaire	health problems	Physical health problems			20.7% - vertigo/ unsteadiness, headaches, pain to ears/head, pressure in ears/head, hyperacusis, nausea/ sick	N/A	N/A	N/A	N/A
																																							Please make a list of the difficulties which you have as a results of your tinnitus. List them in order of importance, starting with the biggest difficulties. Write down as many of them as you can.	Tinnitus Problem Questionnaire	psychological problems	Tinnitus-related distress			30.1% - Inability to concentrate, Distress/upset, Stress/tension/inability to relax, never silent, depression, irritability, isolation, helplessness/frustration, tiredness	N/A	N/A	N/A	N/A
																																							Please make a list of the difficulties which you have as a results of your tinnitus. List them in order of importance, starting with the biggest difficulties. Write down as many of them as you can.	Tinnitus Problem Questionnaire	sleeps difficulties	Sleep difficulties			14.6% -sleep difficulties, getting to sleep, sleeping pills, early waking	N/A	N/A	N/A	N/A
																																							Please make a list of the difficulties which you have as a results of your tinnitus. List them in order of importance, starting with the biggest difficulties. Write down as many of them as you can.	Tinnitus Problem Questionnaire	situational effects	cannot code			11.1% - worse in quiet, worse in noise, worse at night, worse in movement, worse with stress	N/A	N/A	N/A	N/A
44	N/A	N/A	N/A	N/A	N/A	Perceived problems of tinnitus clinic clients at long-term follow up	Sanchez, L.; Stephens, SDG.	not stated	Wales, United Kingdom	journal article		9; 2000	not stated	To investigate tinnitus complaint behaviour over time in a sample of tinnitus patients for whom baseline tinnitus complaint behaviour had been established some years previously.	non-interventional		Follow-up study	Other (please specify)	Survey - one question list of difficulties	Open	2	Tinnitus Problem Questionnaire (TPQ; Tyler and Baker, 1983)	Tinnitus Problem Questionnaire		95	Patients		secondary care services	61.5	not stated	not stated	Male and female	not stated	both	not stated	not stated	not stated	none stated	Please make a list of the difficulties which you have as a results of your tinnitus. List them in order of importance, starting with the biggest difficulties. Write down as many of them as you can.	Tinnitus Problem Questionnaire	Hearing	Negative effects on hearing			N/A	N/A	N/A	N/A	N/A
																																							Please make a list of the difficulties which you have as a results of your tinnitus. List them in order of importance, starting with the biggest difficulties. Write down as many of them as you can.	Tinnitus Problem Questionnaire	Health	Physical health problems			The complaint domains that were essentially unchanged over time were the psychological domain (+1.5%), the hearing domain (–1.8%) and the sleep domain (–1.1%). However, the proportion of long-term complaints in the health domain diminished by 6.9%, whereas the situational complaint domain increased by 8.3%	N/A	N/A	N/A	N/A
																																							Tinnitus Problem Questionnaire (TPQ; Tyler and Baker, 1983)	Tinnitus Problem Questionnaire	Psychological	Tinnitus-related distress			The complaint ‘worse with stress’ showed the largest overall change between the studies and was cited by 12.6% more respondents in the long term than in the initial study.	N/A	N/A	N/A	N/A
																																							Tinnitus Problem Questionnaire (TPQ; Tyler and Baker, 1983)	Tinnitus Problem Questionnaire	Sleep	Sleep difficulties			Psychological complaints remain the dominant concern of both males and females. Sleep-associated complaints continue to be more problematic for females than males.	N/A	N/A	N/A	N/A
																																							Tinnitus Problem Questionnaire (TPQ; Tyler and Baker, 1983)	Tinnitus Problem Questionnaire	Situational difficulties	cannot code			The major shift in complaint ranking at follow up is seen in a substantial increase in situational complaints compensated by a decrease in health-related complaints.	N/A	N/A	N/A	N/A
45	2	2	0	0	4	Treatment of tinnitus in the elderly: a controlled trial of cognitive behavior therapy	Andersson, G.; Porsaeus,D.; Wiklund, M; Kaldo, V.; Christian Larsen, H.	Gerhard.Andersson@ibv.liu.se	Sweden	journal article		1905-06-27	not stated	The aim of this study was to investigate the effects of CBT for tinnitus in older adults (<65 years) using a randomized controlled design.	Invention studies	randomized Cl trial	randomized controlled trial	Questionnaire,		Closed	0	Beck Depression Inventory (BDI)		Beck Depression Inventory	23	Patients		secondary care services	70.1	3.9	65-79	Male and female	13 years (12.5)	not stated	not stated	not stated	not stated	none stated	daily diary ratings	Patient-reported numerical rating scales annoyance			annoyance	Annoyance	N/A	N/A	N/A	N/A	N/A
																		Interviews		Closed		Structured Interview		Structured Interview															daily diary ratings	Patient-reported numerical rating scales sleep			sleep quality	Sleep difficulties	N/A	N/A	N/A	N/A	N/A
																		Questionnaire,		Closed		Hospital Anxiety and Depression scale (HADS)		Hospital Anxiety and Depression scale															daily diary ratings	Patient-reported numerical rating scales tinnitus loudness			loudness	Tinnitus loudness	N/A	N/A	N/A	N/A	N/A
																		Questionnaire,		Closed		Anxiety Sensitivity Index (ASI)		Anxiety Sensitivity Index															Beck's Depression Inventory/Hospital Anxiety and Depression scale	Beck Depression Inventory			depression	Depressive symptoms	N/A	N/A	N/A	N/A	N/A
																		Other (please specify)	daily diary ratings - visual analogue scales (0-100) for: Annoyance, Loudness and Sleep Quality	Closed		rating scale loudness	Patient-reported numerical rating scales tinnitus loudness																Beck's Depression Inventory/Hospital Anxiety and Depression scale	Hospital Anxiety and Depression scale						N/A	N/A	N/A	N/A
																		Other (please specify)	daily diary ratings - visual analogue scales (0-100) for: Annoyance, Loudness and Sleep Quality	Closed		rating scale annoyance	Patient-reported numerical rating scales annoyance																HADS -anxiety subscale	Hospital Anxiety and Depression scale			anxiety	Anxiety	N/A	N/A	N/A	N/A	N/A
																		Other (please specify)	daily diary ratings - visual analogue scales (0-100) for: Annoyance, Loudness and Sleep Quality	Closed		rating scale sleep		Patient-reported numerical rating scales sleep															Anxiety Sensitivity Index	Anxiety Sensitivity Index			anxiety	Anxiety	N/A	N/A	N/A	N/A	N/A
																		Questionnaire,		Closed		Tinnitus Reaction Questionnaire (TRQ)	Tinnitus Reaction Questionnaire																Tinnitus Reaction Questionnaire	Tinnitus Reaction Questionnaire			Distress	Tinnitus-related distress	Tinnitus Distress	N/A	N/A	N/A	N/A
46	0	0	0	2	2	Development and Validation of the Tinnitus Primary Function Questionnaire	Tyler, R.; Haihong, J.; Perreau, A.; Witt, S.; Noble, W.; Coelho, C.	rich-tyler@uiowa.edu	United States	journal article		2014-09-01	May-05 to Jan-09	To create a questionnaire focused on the primary activities impaired by tinnitus and therefore more sensitive to treatments	Invention studies		Follow up study	Questionnaire,		Closed	0	Tinnitus Limitations Questionnaire (an abbreviated form of the Tinnitus Primary Function Questionnaire)	Tinnitus Limitations Questionnaire		100	Patients		secondary care services	not stated	not stated	not stated	not stated	not stated	not stated	not stated	not stated	not stated	none stated	Tinnitus Limitations Questionnaire (an abbreviated form of the Tinnitus Primary Function Questionnaire) - emotions subscale	Tinnitus Limitations Questionnaire			Emotions	cannot code	emotional peace is one of worst effects, depression, anxiety	N/A	N/A	N/A	N/A
																																							Tinnitus Limitations Questionnaire (an abbreviated form of the Tinnitus Primary Function Questionnaire) - Effect of tinnitus on Hearing subscale	Tinnitus Limitations Questionnaire			hearing	Negative effects on hearing	tinnitus masks some speech sounds, interferes with my understanding of speech, effect on speech understanding over and above hearing loss	N/A	N/A	N/A	N/A
																																							Tinnitus Limitations Questionnaire (an abbreviated form of the Tinnitus Primary Function Questionnaire) - Sleep subscale	Tinnitus Limitations Questionnaire			sleep	Sleep difficulties	tired during the day because tinnitus has disrupted sleep, lie awake at night because of tinnitus, difficult to get back to sleep after waking up at night	N/A	N/A	N/A	N/A
																																							Tinnitus Limitations Questionnaire (an abbreviated form of the Tinnitus Primary Function Questionnaire) - concentration subscale	Tinnitus Limitations Questionnaire			concentration	Concentration difficulties	difficult to concentrate on some tasks, difficult to focus attention on some important tasks, inability to think about something undisturbed,	N/A	N/A	N/A	N/A
47	2	2	0	2	6	Use a self-help book with weekly therapist contact to reduce tinnitus distress: A randomized controlled trial	Kaldo, K.; Cars, S.; Rahnert, M.; Larsen, H.; Anderson, G.	viktor.kaldo@psyk.uu.se	Sweden	journal article		63; 2007		To investigate how a CBT-based self-help book supplemented with weekly telephone calls would affect tinnitus distress in comparison to a wait-list control group.	Invention studies		randomized controlled trial	Questionnaire,		Closed	0	Tinnitus Reaction Questionnaire (TRQ)	Tinnitus Reaction Questionnaire		72	Patients		secondary care services	45.9	13	not stated	Male and female	8.6 (SD 8.4)	both	not stated	THI; treatment = 53,1 (23,7); TRQ≥10 and HADS<18 as inclusion criteria	Mild - Severe	none stated	Tinnitus Reaction Questionnaire (TRQ)	Tinnitus Reaction Questionnaire			Tinnitus annoyance and distress	Tinnitus-related distress	baseline: 38.7. On the TRQ, significant reductions were found in the treatment group both immediately following treatment and at 1 - year follow-up.	N/A	N/A	N/A	N/A
																		Questionnaire,		Closed		Tinnitus Handicap Inventory (THI)	Tinnitus Handicap Inventory																Daily diary recordings - VAS	Patient-reported numerical rating scales tinnitus loudness			tinnitus distress	Tinnitus loudness	baseline: 6.0	N/A	N/A	N/A	N/A
																		Questionnaire,		Closed		Hospital Anxiety and Depression Scale (HADS)		Hospital Anxiety and Depression scale															Daily diary recordings - VAS, The Tinnitus Handicap Inventory (THI)	Tinnitus Handicap Inventory			tinnitus loudness	Tinnitus loudness	baseline: 5.0	N/A	N/A	N/A	N/A
																		Other (please specify)	Daily diary recordings - three visual analogue scales (loudness, distress, perceived stress)	Closed		Daily diary recordings - VAS	Patient-reported numerical rating scales distress																Daily diary recordings - VAS, The Tinnitus Handicap Inventory (THI)	Patient-reported numerical rating/visual analogue scales			perceived stress	General distress	baseline: 3.7	N/A	N/A	N/A	N/A
																							Patient-reported numerical rating scales tinnitus loudness																							N/A	N/A	N/A	N/A
																								Patient-reported numerical rating/visual analogue scales																						N/A	N/A	N/A	N/A
48	2	2	0	2	6	Hyperbaric Oxygen (HBO2) in tinnitus: Influence of psychological factors on treatment results?	Stiegler, P.; Matzi, V.; Lipp, C.; Kontaxis, A.; Klemen, H.; Walch, C.; Smolle-Jutter, F.	not stated	Austria	journal article		33(6); 2006	1998 - 2003	We analysed the effectiveness of HBO2 treatment on tinnitus in the context of pre-treatment expectations. The therapeutic effect of HBO2 treatment in the context of accompanying factors, especially focusing on the patients attitude towards HBO2 proir to therapy	Invention studies		not stated	Questionnaire,		Closed	0	Authors own questionnaire of subjective impact of tinnitus on daily life	Author's own		360	Patients		secondary care services	49.2 (median)	14.5	not stated	Male and female	14days to >1 year	not stated	not stated	impact: 6.9% (23) not disturbed at all; 15.4% (51) felt occasional trouble w/o signif impact; 21.4% (71) medium grade; 28.7% (95) high grade; 27.5% (91) very severe impact	Complete grading scale	none stated	Subjective impact of tinnitus	Author's own			impact of tinnitus on daily life	Quality of life (tinnitus)	N/A	N/A	N/A	N/A	N/A
																		Questionnaire,		Closed		Authors own questionnaire on noise characteristics of tinnitus, subjective impairment, subjective expectation of success and patient characteristics	Author's own																Authors own questionnaire on noise characteristics of tinnitus, subjective impairment, subjective expectation of success and patient characteristics	Author's own			tinnitus intensity	Tinnitus loudness	N/A	N/A	N/A	N/A	N/A
49	2	2	2	2	8	Psychophysiologic treatment of chronic tinnitus: a randomised clinical trial	Rief, W.; Weise, C.; Kley, N.; Martin, A.	rief@staff.uni-marberg.de	Germany	journal article		64; 2005	Oct 2002 - Dec 2002 (recruitment)	To develop and evaluate a new intervention programme including a psychophysiological approach	Invention studies		Randomised clinical trial	Questionnaire,		Closed	0	Tinnitus Questionnaire (GHTQ) - German	Tinnitus Questionnaire (German)		42	Patients		secondary care services	45.5 (tx); 48.0 (wl)	12.8 (tx); 8.3 (wl)	not stated	Male and female	4.5 (5.3) (tx); 8.3 (7.7) (wl)	not stated	not stated	inclusion: tinnitus was disturbing, annoyance >3 (0 -10); GHTQ = 33.8 (15.3) (merged gps)	Mild - Severe	none stated	Tinnitus Questionnaire (GHTQ)	Tinnitus Questionnaire (German)			Emotional distress	Tinnitus-related distress	N/A	N/A	N/A	N/A	N/A
																		Interviews		Closed		Structured Tinnitus Interview	Structured Tinnitus Interview					general public											Tinnitus Questionnaire (GHTQ)	Tinnitus Questionnaire (German)			Cognitive distress	Cognitive difficulties	N/A	N/A	N/A	N/A	N/A
																		Questionnaire,		Closed		International diagnostic checklist		International diagnostic checklist															Structured Tinnitus Interview	Structured Tinnitus Interview			Hearing problems	Negative effects on hearing	N/A	N/A	N/A	N/A	N/A
																		Other (please specify)	Diary containing Visual Analogue Scale	Closed		Tinnitus diary rating loudness (0-10 points)	Patient-reported numerical rating scales tinnitus loudness																Structured Tinnitus Interview	Structured Tinnitus Interview			tinnitus persistence	Tinnitus awareness	N/A	N/A	N/A	N/A	N/A
																						Tinnitus diary rating control (0-10 points)	Patient-reported numerical rating scales duration																Tinnitus diary	Patient-reported numerical rating scales annoyance			Tinnitus annoyance	Annoyance	N/A	N/A	N/A	N/A	N/A
																						Tinnitus diary rating duration of tinnitus perception (minutes)	Patient-reported numerical rating scales control																Tinnitus diary	Patient-reported numerical rating scales control			controlability	Loss of control	N/A	N/A	N/A	N/A	N/A
																		Questionnaire,		Closed		Health-related life satisfaction		Health-related life satisfaction															Tinnitus diary	Patient-reported numerical rating scales tinnitus loudness			tinnitus loudness	Tinnitus loudness	N/A	N/A	N/A	N/A	N/A
																		Questionnaire,		Closed		Self-efficacy - german adaption of Bandura scale		Self-efficacy of Bandura scale (German)																						N/A	N/A	N/A	N/A
50	1	2	1	2	6	Socio-Demographic, Health, and Tinnitus related variables affecting tinnitus severity	Hoekstra, CEL.; Wesdrop, FM.; van Zanten, GA.	researchKNO@umcutrecht.nl	Netherlands	journal article		35; 2014	June 2007 - Nov 2012	To identify socio-demographic, health and tinnitus variables that independently affect tinnitus severity.	non-interventional		retrospective cohort study	Questionnaire,		Closed	0	Tinnitus Questionnaire	Tinnitus Questionnaire		309	Patients		secondary care services	51	not stated	17-82	Male and female	7 yrs (range: 2mths - 48yrs)	both	not stated	TQ = 40 (SD: 17); THI = 45 (SD: 23)	Mild - Severe	none stated	Tinnitus Questionnaire/Tinnitus Handicap Inventory	Tinnitus Questionnaire			Tinnitus severity	cannot code	N/A	N/A	N/A	N/A	N/A
																		Questionnaire,		Closed		Tinnitus Handicap Inventory	Tinnitus Handicap Inventory																Tinnitus Questionnaire/Tinnitus Handicap Inventory	Tinnitus Handicap Inventory					N/A	N/A	N/A	N/A	N/A
																		Other (please specify)	Visual Analogue Scale	Closed		Visual Analogue Scale - pitch	Patient-reported numerical rating scales pitch																Characteristic questions	Author's own			awareness during the day	Tinnitus awareness	related to strongly to severity - higher percentage of awareness	N/A	N/A	N/A	N/A
																		Other (please specify)	Visual Analogue Scale	Closed		Visual Analogue Scale - presence	Patient-reported numerical rating scales presence																author question	Author's own			Changes in perception over time	cannot code	increased = 50%, decreased = 7%, unchanged = 43%	N/A	N/A	N/A	N/A
																		Other (please specify)	Visual Analogue Scale	Closed		Visual Analogue Scale - loudness	Patient-reported numerical rating scales tinnitus loudness																VAS	Patient-reported numerical rating scales pitch			Tinnitus Pitch	Tinnitus pitch	small effect sizes were found with increased perception of tinnitus over time, higher tinnitus pitch, more variable tinnitus on VAS, higher minimal masking levels and no masking through background sounds	N/A	N/A	N/A	N/A
																		Other (please specify)	Visual Analogue Scale	Closed		Visual Analogue Scale - variability	Patient-reported numerical rating scales variability																VAS	Patient-reported numerical rating scales tinnitus loudness			tinnitus loudness	Tinnitus loudness	related to strongly to severity - louder tinnitus on VAS	N/A	N/A	N/A	N/A
																																							unclear	unknown			Distortion of sounds	Negative effects on hearing	large effect sizes found distortion of sounds - related significantly to tinnitus severity if measured on TQ. Only 22% reported problems from hardly ever to daily.	N/A	N/A	N/A	N/A
																																							unclear	unknown			Pain complaints	Pain	47% yes	N/A	N/A	N/A	N/A
51	1	2	0	0	3	Depression, Anxiety and Stress Scale in patients with tinnitus and hearing loss	Gomma, MAM.; Elmagd, MHA.; Elbadry, MM.; Kadar, RMA.	magomaa@yahoo.com	Egypt	journal article		271; 2014	not stated	The aim of our study is to use Depression, Anxiety and Stress Scale (DASS) in evaluating patients that suffer from tinnitus associated with hearing loss.	non-interventional		prospective study	Questionnaire,		Closed	0	Depression, Anxiety and Stress Scale (DASS)		Depression, Anxiety and Stress Scale	100	Patients		secondary care services	not stated	not stated	20-60	Male and female	1mth - 5 yrs	not stated	not stated	Mild (28), Moderate (54), Severe (18) according to visual analogue scale	Complete grading scale	hearing loss								N/A	N/A	N/A	N/A
														To evaluate co-morbid depression, anxiety and stress associated with tinnitus patients				Other (please specify)	Visual Analogue Scale (VAS)	Closed		Visual Analogue Scale (VAS) - to classify tinnitus severity	Patient-reported numerical rating scales tinnitus severity																	Depression, Anxiety and Stress Scale			Anxiety	Anxiety	autonomic arousal, skeletal muscle effects, situational anxiety, subjective experience of anxious effect. More than half of the patients (58 %) that suffer from tinnitus had severe and extremely severe anxiety, and 28% only had mild to moderate degree	N/A	N/A	N/A	N/A
																																								Depression, Anxiety and Stress Scale			Stress	General distress	chronic non-specific arousal, difficulty in relaxing, nervous arousal, being easily upset/agitated, irritable/over-reactive, impatient. Approximately 23 % of patients are free from stress. Forty-three percent of tinnitus patients suffer from mild to moderate stress, while 30 % of them suffer from severe and extreme stress.	N/A	N/A	N/A	N/A
52	N/A	N/A	N/A	N/A	N/A	Mixed feelings about living with tinnitus: A qualitative study	Andersson, G.; Edvinsson, E.	gerhard.andersson@liu.se	Sweden	journal article		6(1); 2008	not stated	The aim of this qualitative study was to interview a group of tinnitus patients who were or had been involved in psychological treatment for their tinnitus. The purpose was to obtain the patients' view of tinnitus and their treatment, using an open approach suitable for qualitative analysis.	non-interventional		Qualitative study	Interviews	semi-structured	Open	2	Interview	Semi-structured interview	author's own	7	Patients		secondary care services	47	not stated	22-60	Male and female	4.6 (range: 1.5 - 8yrs)	not stated	not stated	not stated	not stated	none stated	How is it for you to live with tinnitus? How much does it affect you?	Semi-structured interview	Auditory: Hyperacusis	Reduced sound tolerance			For the auditory consequences most participants reported that they had developed hyperacusis following the onset of tinnitus.	N/A	N/A	N/A	N/A
																																								Semi-structured interview	Auditory: Sound distortion	Negative effects on hearing			Interestingly, sound distortion was also mentioned, despite its relative absence in writings about tinnitus, as exemplified in this quote: ‘‘If you, for example, consider violins and harps, which are very loud . . . they used to be nice to listen to, but now it is as if they are distorted and I feel sick’’ (patient 1, line 58_60).	N/A	N/A	N/A	N/A
																																							How have you been treated by the health services?	Semi-structured interview	Auditory: Disturbs sleep	Sleep difficulties			Several times patients talked about sleep difficulties, both in terms of having difficulties falling asleep and being awakened during the night: ‘‘You wake up in the middle of the night when tinnitus moves into a more severe phase’’ (patient 4, line 364).	N/A	N/A	N/A	N/A
																																								Semi-structured interview	Psychological: Insomnia	Sleep difficulties			Insomnia - "Sleep difficulties were also part of the psychological consequences category, but more from an emotional point of view: ‘‘When it is time to go to sleep and all that my head is filled with thoughts about tinnitus’’ (patient 2, line 464)."	N/A	N/A	N/A	N/A
																																								Semi-structured interview	Psychological: Lack of energy	Physical health problems			lack of energy, tension, concentration difficulties were very common	N/A
																																								Semi-structured interview	Psychological: Tension	Bodily complaints			lack of energy, tension, concentration difficulties were very common	N/A
																																								Semi-structured interview	Psychological: Depression/low mood	Depressive symptoms			low mood and depression	N/A
																																								Semi-structured interview	Psychological: Concentration difficulties	Concentration difficulties			lack of energy, tension, concentration difficulties were very common	N/A	N/A	N/A	N/A
																																							Has your own self-image changed because of the tinnitus?	Semi-structured interview	Psychological: Self image	Change in sense of self			Self-image "affected in a negative way as exemplified by this quote: ‘‘I am retired now, 54 years and retired, it is not really fun is it, to think that thought?’’ (patient 1, line 10)."	N/A	N/A	N/A	N/A
																																								Semi-structured interview	Psychological: Worry about the future	Worries/concerns			Worry about the future - "The worries dealt with fear that tinnitus would become worse, and that no one would take care of the person when he/she gets older. One patient mentioned the fear that he would not be able to control background sounds when he would be placed in a nursing home."	N/A	N/A	N/A	N/A
																																							How is your social life nowadays?	Semi-structured interview	Social: Social life affected	Negative impact on social life			Social life affected - Social life was limited	N/A	N/A	N/A	N/A
																																							How much does your tinnitus affect your leisure time?	Semi-structured interview	Social: Work	Negative impact on work activities			Work - Work as a situation in which tinnitus had a severe negative impact. Some had stopped working altogether, and others had reduced their working hours or changed workplace/work assignments.	N/A	N/A	N/A	N/A
																																							What are the consequences of tinnitus for your social life? How is the tinnitus affecting your family and friends?	Semi-structured interview	Social: Ignorance/lack of knowledge	Frustration			Ignorance/Lack of knowledge - Experiences of people not understanding tinnitus (lack of knowledge) or even ignorance were reported. This resulted in frustration: ‘‘so …everyone says ‘you can’t keep on focusing on tinnitus, you must do something nice instead, like travelling’ …but I say ‘Yes, but I cannot fly any more’’ (patient 1, line 686_688). Some had also experienced that while people might k…	N/A	N/A	N/A	N/A
																																							Do other people see you in a different way now because of your tinnitus?	Semi-structured interview	Social: How other people are affected	Negative impact on relationships			How other people are affected - ‘‘…I become, yes, some kind of obstacle for, for some things my wife and I might have planned to do together’’ (patient 4, 184).	N/A	N/A	N/A	N/A
																																							How do other people react when you say that you have tinnitus?	Semi-structured interview	Positive: Changed view of the world	Negative impact on activities			Changed view of the world - ‘‘It is this way that now when things don’t fit in well today and I feel tired or the sound prevents me from doing things or if my tinnitus would become louder if I do a certain thing, I just say no to it. And it is that that is different, because before tinnitus I always said yes and helped others to do a lot of things’’ (patient 6, 256_258).	N/A	N/A	N/A	N/A
																																								Semi-structured interview	Positive: Experience of knowing about tinnitus	Need for knowledge			Experience of knowing about tinnitus - ‘‘At the same time, I mean, it is a bit interesting too to have tinnitus since you are, since it is, you know what it is, mmm, you as a researcher and interested in it. Well, you do not know how it feels, perhaps it is not something to wish for, but at the same time, it is an interesting experience too, sort of ’’ (patient 3, 262_264).	N/A	N/A	N/A	N/A
																																							Have you received any treatment (this varied according to what treatment they had received)?	Semi-structured interview	Treatment experiences: Ambivalence regarding knowledge	Worries/concerns			For example, it could be the case that worries about the future consequence of tinnitus had started firstly after having received information about tinnitus in a health care setting. This is exemplified in the quote: ‘‘Yes, it has sort of grown in importance. It becomes a general feeling of worry in me that I did not have before when I did not know so much. It gets back at me, perhaps in many are…	N/A	N/A	N/A	N/A
																																								Semi-structured interview	Tinnitus identity: private identity	Change in sense of self			Being alone - the private experience of having to live with tinnitus and the innermost personal consequences for personal identity. Patients described feelings of panic, and the difficulties involved with becoming enmeshed with the symptom of tinnitus.	N/A	N/A	N/A	N/A
																																								Semi-structured interview	Tinnitus identity: public identity	Difficulties coping			Saving face - ‘what is shown to other people’ "one patient had actually started using a tinnitus masker (noise generator) with the specific purpose (along with other reasons) of making it more visible. A few had the experience of being questioned: ‘‘Just as if you are cheating, a traitor, using tinnitus which is difficult to measure, as an excuse’’ (patient 7, 586), which of course precluded the …	N/A	N/A	N/A	N/A
																																								Semi-structured interview	Tinnitus identity: public identity	Lack of support from family and friends			The invisibility of tinnitus was sometimes perceived as problematic. The view that other people are less interested and understanding when a physical condition cannot be seen was presented: ‘‘People seem to lose the understanding when things are not concrete. If you have a broken leg, you can be asked ‘how is it progressing, what does the doctor say, etc’. But with tinnitus things are different, …	N/A	N/A	N/A	N/A
																																									Tinnitus Identity: Comparative	Change in sense of self			A patient could perceive his tinnitus as less problematic than others, but this could be experienced as negative and as self-blame for still being disturbed by the tinnitus. For another patient the same comparison could lead to a positive experience (e.g. downward comparison: ‘‘I am still better than he is’’). Some felt that it was frustrating that other people did not know that tinnitus comes in…	N/A	N/A	N/A	N/A
53	2	2	2	2	8	Randomised controlled trial of internet-based Cognitive behavioural Therapy for distress assocaited with tinnitus	Andersson, G.; Stromgren, T.; Strom, L.; Lytikens, L.	Gerhard.Andersson@psyk.uu.se	Sweden	journal article		64; 2002	not stated	The aim of this study was to investigate if cognitive behaviour therapy (CBT) provided via the internet results in significant decreases of distress in individuals with tinnitus	Invention studies		Randomised controlled trial (waiting list) with two phases; i randomised controlled phase ii uncontrolled follow up (1yr)	Questionnaire,		Closed	0	Tinnitus Reaction Questionnaire (TRQ) - Swedish version	Tinnitus Reaction Questionnaire (Swedish)		117	Patients		general public	48.5 (tx); 47.2 (wl)	12.3 (tx); 15.0 (wl)	18 - 70 years (inclusion)	Male and female	6.2 (5.6) yrs (tx); 6.4 (6.8) yrs (wl)	not stated	both	TRQ mean: 42.6 (21.6) (tx); 38.2 (24.03) (wl)	no grading scale	none stated	Tinnitus Reaction Questionnaire	Tinnitus Reaction Questionnaire			Tinnitus problem	cannot code	N/A	N/A	N/A	N/A	N/A
																		Questionnaire,		Closed		Hospital Anxiety and Depression Scale - Swedish version		Hospital Anxiety and Depression Scale (Swedish)															VAS loudness	Patient-reported numerical rating scales tinnitus loudness			Tinnitus Loudness	Tinnitus loudness	N/A	N/A	N/A	N/A	N/A
																		Questionnaire,		Closed		Anxiety Sensitivity Index - Swedish version		Anxiety Sensitivity Index (Swedish)															VAS annoyance	Patient-reported numerical rating scales annoyance			Annoyance caused by tinnitus	Annoyance	N/A	N/A	N/A	N/A	N/A
																		Other (please specify)	Daily diary ratings with Visual Analogue Scale (VAS)	Closed		Diary ratings on VAS ratings of tinnitus loudness, annoyance caused by tinnitus, control over tinnitus, quality of sleep	Patient-reported numerical rating scales tinnitus loudness																VAS control	Patient-reported numerical rating scales control			control over tinnitus	Loss of control	N/A	N/A	N/A	N/A	N/A
																		Other (please specify)	Daily diary ratings with Visual Analogue Scale (VAS)	Closed		Diary ratings on VAS ratings of tinnitus loudness, annoyance caused by tinnitus, control over tinnitus, quality of sleep	Patient-reported numerical rating scales annoyance																VAS quality of sleep	Patient-reported numerical rating scales sleep			Quality of sleep	Sleep difficulties	N/A	N/A	N/A	N/A	N/A
																		Other (please specify)	Daily diary ratings with Visual Analogue Scale (VAS)	Closed		Diary ratings on VAS ratings of tinnitus loudness, annoyance caused by tinnitus, control over tinnitus, quality of sleep	Patient-reported numerical rating scales control																Anxiety sensitivity index	Anxiety Sensitivity Index			fear of anxiety related somatic sensations	Distress from bodily complaints	N/A	N/A	N/A	N/A	N/A
																		Other (please specify)	Daily diary ratings with Visual Analogue Scale (VAS)	Closed		Diary ratings on VAS ratings of tinnitus loudness, annoyance caused by tinnitus, control over tinnitus, quality of sleep		Patient-reported numerical rating scales sleep															Screening questionnaire	Author's own			Sleep problems	Sleep difficulties	60% (tx) 65% (wl)	N/A	N/A	N/A	N/A
																		Questionnaire,		Not known		Screening questionniare based on structured interview for tinnitus history and complaints	Author's own																Screening questionnaire	Author's own			interference with concentration	Concentration difficulties	90% (tx) 84% (wl)	N/A	N/A	N/A	N/A
																																							Screening questionnaire	Author's own			Hearing problems	Negative effects on hearing	69% (tx) 68% (wl)	N/A	N/A	N/A	N/A
54	2	2	0	2	6	Treatment of tinnitus with cyclobenzaprine: an open-label study	Vanneste, S.; Figueiredo, R.; De Ridder, D.	sven.vanneste@ua.ac.be	Belgium	journal article		50(5); 2012	not stated	The aim of the present study was to investigate the effect of a tricyclic pharmacological agent, namely cyclobenzaprine for the relief of tinnitus complaints.	Invention studies		an open-label study	Other (please specify)	Visual Analogue Scale (VAS)	Closed	0	tinnitus intensity and tinnitus distress	Patient-reported numerical rating scales distress		65	Patients		secondary care services	57.67	11.73	not stated	Male and female	6.89 (range: 1 - 30yrs)	not stated	not stated	TQ = 45.17 (SD: 7.18)	Moderate - Severe	none stated	Visual Analogue Scales tinnitus distress	Patient-reported numerical rating scales distress			Tinnitus distress	Tinnitus-related distress	N/A	N/A	N/A	N/A	N/A
																			Visual Analogue Scale (VAS)	Closed		tinnitus intensity and tinnitus distress	Patient-reported numerical rating scales tinnitus loudness																Visual Analogue Scales tinnitus intensity	Patient-reported numerical rating/visual analogue scales			effect for tinnitus intensity	Tinnitus loudness	N/A	N/A	N/A	N/A	N/A
																		Questionnaire,		Closed		Tinnitus Questionnaire (TQ)	Tinnitus Questionnaire																Tinnitus Questionnaire	Tinnitus Questionnaire			psychological and psychosomatic distress	Distress from bodily complaints	N/A	N/A	N/A	N/A	N/A
																																							Tinnitus Questionnaire	Tinnitus Questionnaire			Emotional & Cognitive distress	Tinnitus-related distress	no means given, correlarions between the different subscales of the TQ and the total TQ score and the amount of reduction of tinnitus intensity and tinnitus distress revealed no significant effect	N/A	N/A	N/A	N/A
																																							Tinnitus Questionnaire	Tinnitus Questionnaire			Intrusiveness	Tinnitus intrusiveness	N/A	N/A	N/A	N/A	N/A
																																							Tinnitus Questionnaire	Tinnitus Questionnaire			auditory perceptual difficulties	Negative effects on hearing	N/A	N/A	N/A	N/A	N/A
																																							Tinnitus Questionnaire	Tinnitus Questionnaire			sleep difficulties	Sleep difficulties	N/A	N/A	N/A	N/A	N/A
																																							Tinnitus Questionnaire	Tinnitus Questionnaire			somatic complaints	Bodily complaints	N/A	N/A	N/A	N/A	N/A
55	2	2	0	2	6	Psychotic measurements of patients who presented to our clinic with subjective tinnitus symptoms	Ozbal, KA.; Kalaycik, EC.; Sayan, KS.; Erbek, S.	ckalaycik@gmail.com	Turkey	journal article		14(4); 2015	June 2014 - Dec 2014	Evalaute the relation of between age, gender, hearing loss, depression and anxiety scores with tinnitus. Aimed to assess the correlation between auditory data, psychoitic and acoustic measures assocaited with subjective tinnitus	non-interventional		not stated	Questionnaire,		Closed	0	Tinnitus Handicap Inventory - Turkish version	Tinnitus Handicap Inventory (Turkish)		100	Patients		secondary care services	52.2	14.9	19-81	Male and female	less than 1 yr - more than 5yrs	not stated	not stated	not stated	not stated	none stated	Tinnitus Handicap Inventory	Tinnitus Handicap Inventory			Tinnitus handicap	cannot code	N/A	N/A	N/A	N/A	N/A
																		Questionnaire,		Closed		VAS level of disturbance/discomfort caused by tinnitus (VAS annoyance, unpleasantness, ignorance)	Patient-reported numerical rating scales annoyance																VAS ignorance	Patient-reported numerical rating scales ignorance			ignorability	Ability to ignore	annoyance, unpleasantness and anxiety values of patients who are included 40-60 and 60+ yrs groups together with mild tinnitus were significantly lower than other groups.	N/A	N/A	N/A	N/A
																							Patient-reported numerical rating scales ignorance																VAS annoyance	Patient-reported numerical rating scales annoyance			Annoyance	Annoyance	N/A	N/A	N/A	N/A	N/A
																							Patient-reported numerical rating scales unpleasantness																VAS unpleasantness	Patient-reported numerical rating scales unpleasantness			unpleasant	Tinnitus unpleasantness	N/A	N/A	N/A	N/A	N/A
																		Questionnaire,		Closed		Beck's Depression Inventory		Beck Depression Inventory															Beck's Anxiety Inventory	Beck Anxiety Inventory			anxiety	Anxiety	N/A	N/A	N/A	N/A	N/A
																		Questionnaire,		Closed		Beck's Anxiety Inventory		Beck Anxiety Inventory																					N/A	N/A	N/A	N/A	N/A
56	2	2	0	2	6	Evaluation of anxiety and depression levels in tinnitus patients	Cho, CG.; Chi, JH.; Song, JJ.; Lee, EK.; Kim, BH.	cho69@dumc.or.kr	Korea	journal article		17; 2013	Jan 2009 - June 2010	The aims of this study were to evaluate the relationship between tinnitus and the level of anxiety and depression experienced by subjective tinnitus patients, and to determine the effect of the level of anxiety and depression to the results of tinnitus treatment.	Invention studies		not stated	Questionnaire,		Closed	0	Tinnitus Handicap Inventory - Korean version	Tinnitus Handicap Inventory (Korean)		104	Patients		secondary care services	51	13.2	not stated	Male and female	30.7 months	not stated	not stated	THI = 40.1 (24.1) 47% with scores of more than 38 indicating moderate or more serious tinnitus. (Mild = less than 38)	Mild - Severe	sensorineural hearing loss	VAS scores	Patient-reported numerical rating scales tinnitus loudness			loudness	Tinnitus loudness	higher scores for those with higher THI scores	N/A	N/A	N/A	N/A
																		Questionnaire,		Closed		Authors own Tinnitus Questionnaires	Author's own																VAS scores	Patient-reported numerical rating scales awareness			awareness	Tinnitus awareness	N/A	N/A	N/A	N/A	N/A
																		Questionnaire,		Closed		VAS scores (subjective assessment of tinnitus, loudness of tinnitus, awareness of tinnitus, annoyance with tinnitus, effect on lfe)	Patient-reported numerical rating scales tinnitus loudness																VAS scores	Patient-reported numerical rating scales annoyance			annoyance	Annoyance	N/A	N/A	N/A	N/A	N/A
																						VAS scores (subjective assessment of tinnitus, loudness of tinnitus, awareness of tinnitus, annoyance with tinnitus, effect on lfe)	Patient-reported numerical rating scales awareness																VAS scores	Patient-reported numerical rating scales effect on life			effect on life	Health-related quality of life	N/A	N/A	N/A	N/A	N/A
																						VAS scores (subjective assessment of tinnitus, loudness of tinnitus, awareness of tinnitus, annoyance with tinnitus, effect on lfe)	Patient-reported numerical rating scales annoyance																						N/A	N/A	N/A	N/A	N/A
																		Questionnaire,		Closed		Beck's Depression Inventory (BDI) - Korean version		Beck Depression Inventory (Korean)																					N/A	N/A	N/A	N/A	N/A
																		Questionnaire,		Closed		State Trait Anxiety Inventory (STAI 1 + 2)		State Trait Anxiety Inventory																					N/A	N/A	N/A	N/A	N/A
57	2	0	1	0	3	Efficacy of low-level laser therapy in the management of tinnitus due to noise-induced hearing loss: a double-blind randomized clinical trial	Bahaloo, Maryam	drbahaloo@gmail.com	Iran	journal article		2013-09-12	Baseline and 3 months after intervention	To evaluate the effect of low-evel laser therapy on tinnitus accompanied by noise-induced hearing loss.	Invention studies	20 sessions of low-level laser therapy	Double-blind randomized clinical trial	Questionnaire,		Closed	0	Visual Analogue Scale	Patient-reported numerical rating/visual analogue scales	Patient-reported numerical rating/visual analogue scales	44	Patients		secondary care services	41.17	±5.89 years ?	30-51	Male	1.85±0.78 years	not stated	not stated	not stated, but identified using THI	not stated	noise induced hearing loss	VAS	Patient-reported numerical rating scales tinnitus loudness			Loudness	Tinnitus loudness	N/A	not stated	N/A	not stated	N/A
							Mollasadeghi, Abolfazl															Tinnitus Handicap Inventory	Tinnitus Handicap Inventory																Tinnitus handicap Inventory	Tinnitus Handicap Inventory			Severity	cannot code	N/A	N/A	N/A	N/A	N/A
							Mirmohammadi, Seyyed Jalil															Tinnitus Loudness	Patient-reported numerical rating scales tinnitus loudness																						N/A	N/A	N/A	N/A	N/A
58	2	2	0	0	4	Tinnitus Retraining Therapy: Mixing Point and Total Masking Are Equally Effective	Richard S. Tyler, William Noble, Claudia Barros Coelho, and Haihong Ji	rich-tyler@uiowa.edu	United States	journal article		2012 (vol 33)	not stated	to compare the effectiveness of retraining therapy with mixing-point masking, total masking, and with counseling alone.	Other (please specify)	randomized clinical trial	Subjects were randomized (coin toss) to one of three groups after the pretreatment measurements were obtained. At pretreatment, both clinicians and patients were “blinded” regarding the assigned treatment group	Questionnaire,		Closed	0	Tinnitus Handicap Questionnaire	Tinnitus Handicap Questionnaire		48	Patients		secondary care services	counseling: 55; total masking, 58; retraining, 57	counseling: 10; total masking, 6; retraining, 10	not stated	Male and female	counseling: 4(7); total masking, 10(15); retraining, 5(6)	not stated	not stated	Pre-treatment THQ: counseling: 47(25); total masking, 51(23); retraining, 42(18)	No grading system	none stated	TRQ (global score)	Tinnitus Reaction Questionnaire			distress	Tinnitus-related distress	N/A	N/A	N/A	N/A	N/A
59a	2	2	0	2	6	The Tinnitus Functional Index: Development of a New Clinical Measure for Chronic, Intrusive Tinnitus	Mary B Meikle, James A Henry etc al		United States	journal article		2011	July 2004 to June 2008 stage 1 = 6 months Stage 2 = 18 Months Sate 3 = 24 months	to develop a new self-report questionnaire, the TFI, to measure the construct defined as the severity and negative impact of tinnitus. One intended purpose of the TFI was for use as an outcome measure with documented responsiveness for assessing treatment-related changes in tinnitus.A second intended purpose of the TFI was as a measure of individual differences for intake evaluation. A third inte…	non-interventional	Longitundinal follow-up	to determine which among a number of questionnaire items performed best in evaluating treatmentrelated mprovements in tinnitus,	Questionnaire,		Closed	0	TFI questionnaire development						secondary care services																	N/A	N/A	N/A	N/A	N/A
														Stage 2 Clinical Evaluation of TFI Prototype 1			was to evaluate TFI Prototype 1 quantitatively in terms of responsiveness, underlying domains (internal structure), and ability to scale tinnitus severity.	Questionnaire,		Closed		TFI questionnaire (prototype 1)	Tinnitus Functional Index		326	Patients		secondary care services	62.2	12.7	17-87	Male and female	less than 1 year to more than 20 years	both	not stated		not stated	none stated	TFI Prototype 1	Tinnitus Functional Index - prototype 1			Emotional Distress	Tinnitus-related distress	Anxious or worried Angry Annoyed Upset or bothered Irritable Tense or stressed Frustrated	N/A	N/A	N/A	N/A
																		Questionnaire,		Closed		Tinnitus History Questionnaire A	History questionnaire		65 (3 mths)														TFI Prototype 1	Tinnitus Functional Index - prototype 1			Social Distress or Impact	Negative impact on social life	Enjoyment of social activities Participation in social events Harder to interact pleasantly Stress on relationships	N/A	N/A	N/A	N/A
																		Other (please specify)	Visual analogue Scale	Closed		Visual analogue Scale for Tinnitus Severity 100 mm line How severe your tinnitus has been over the last week)	Patient-reported numerical rating scales tinnitus severity		42 (6 mths)														TFI Prototype 1	Tinnitus Functional Index - prototype 1			Unpleasantness, Intrusiveness	Tinnitus intrusiveness	How strong or loud How unpleasant How much discomfort Uncomfortable in quiet	N/A	N/A	N/A	N/A
																		Other (please specify)	Global question	Closed		An item for scaling the global severity of tinnitus How much of a problem is your tinnitus. Self-report of hearing problem.	Patient-reported numerical rating scales tinnitus severity																TFI Prototype 1	Tinnitus Functional Index - prototype 1			Persistence	Tinnitus awareness	Percent of time aware Percent of time annoyed How easy/difficult to ignore Loss of "peace and quiet"	N/A	N/A	N/A	N/A
																		Questionnaire,		Closed		Tinnitus Handicap Inventory (THI) 25 item	Tinnitus Handicap Inventory																TFI Prototype 1	Tinnitus Functional Index - prototype 1			Work Interference	Negative impact on work activities	Difficulty performing work Had to cut down amount of work time Accomplished less work than wanted	N/A	N/A	N/A	N/A
																		Questionnaire,		Closed		Beck Depression Inventory BDI-PC		Beck Depression Inventory															TFI Prototype 1	Tinnitus Functional Index - prototype 1			Leisure Interference	Negative impact on social life	General interference with leisure Interference with quiet resting activities Less interested in going out	N/A	N/A	N/A	N/A
																																							TFI Prototype 1	Tinnitus Functional Index - prototype 1			Disturbance of Sleep and Rest	Sleep difficulties	Interference with falling or staying asleep Difficulty getting adequate sleep or rest Prevented from deep, peaceful sleep	N/A	N/A	N/A	N/A
																																							TFI Prototype 1	Tinnitus Functional Index - prototype 1			Disturbance of Relaxation	Difficulties relaxing	Interference with ability to relax	N/A	N/A	N/A	N/A
																																							TFI Prototype 1	Tinnitus Functional Index - prototype 1			Auditory Perceptual Difficulties Attributable to Tinnitus	Negative effects on hearing	General interference with hearing Interference with speech comprehension Interference with communication in groups or at meetings	N/A	N/A	N/A	N/A
																																							TFI Prototype 1	Tinnitus Functional Index - prototype 1			Somatic and Physical Complaints Due to tinnitus	Physical health problems	How fatigued has tinnitus made you feel General feeling of poor health How much of time did tinnitus cause headaches	N/A	N/A	N/A	N/A
																																							TFI Prototype 1	Tinnitus Functional Index - prototype 1			Other = Cognitive interference	Cognitive difficulties	Interference with concentration Difficulty focusing on things other than tinnitus Difficulty thinking clearly or remembering	N/A	N/A	N/A	N/A
																																							TFI Prototype 1	Tinnitus Functional Index - prototype 1			other = Impaired Quality of Life	Quality of life (tinnitus)	Reduced enjoyment of life Reduced overall quality of life	N/A	N/A	N/A	N/A
																																							TFI Prototype 1	Tinnitus Functional Index - prototype 1			Other = Reduced Sence of Control	Loss of control	How much in control of tinnitus Difficulty coping with tinnitus	N/A	N/A	N/A	N/A
59b	2	2	0	2	6	Study 2			United States					Stage 3 Clinical evaluation of TFI Prototype 2				Questionnaire,		Closed	0	TFI Questionnaire Prototype 2	Tinnitus Functional Index		347	Patients		secondary care services	60.2	11.8	22-90	Male and female	less than 1 year to more than 20 years	both	not stated		not stated	none stated	TFI Prototype 2	Tinnitus Functional Index - prototype 2			Intrusiveness	Tinnitus intrusiveness	% Time AWARE 2 How STRONG or LOUD 5 How much DISCOMFORT % Time ANNOYED	N/A	N/A	N/A	N/A
																		Questionnaire,		Closed		Tinnitus History Questionnaire A	History questionnaire		155 (3 mths)														TFI Prototype 2	Tinnitus Functional Index - prototype 2			Emotional Effects	Tinnitus-related distress	How ANXIOUS or WORRIED How FATIGUED How BOTHERED or UPSET How DEPRESSED	N/A	N/A	N/A	N/A
																		Other (please specify)	Visual analogue Scale	Closed		Visual analogue Scale for Tinnitus Severity 100 mm line How severe your tinnitus has been over the last week)	Patient-reported numerical rating scales tinnitus severity		86 (6 mths)														TFI Prototype 2	Tinnitus Functional Index - prototype 2			Sense of Control	Loss of control	How much IN CONTROL How easy to COPE How easy to IGNORE	N/A	N/A	N/A	N/A
																		Other (please specify)	Global question	Closed		An item for scaling the global severity of tinnitus How much of a problem is your tinnitus. Self-report of hearing problem.	Patient-reported numerical rating scales tinnitus severity																TFI Prototype 2	Tinnitus Functional Index - prototype 2			Global Impact on Life/Quality of life	Quality of life (tinnitus)	Interferes—RELATONSHIPS interferes—SOCIAL—Participation Interferes—LEISURE Interferes—SOCIAL—Enjoyment Interferes—ENJOYMENT of LIFE Difficulty PERFORMING WORK Reduced QUALITY OF LIFE	N/A	N/A	N/A	N/A
																		Questionnaire,		Closed		Tinnitus Handicap Inventory (THI) 25 item	Tinnitus Handicap Inventory																TFI Prototype 2	Tinnitus Functional Index - prototype 2			Cognitive Effects	Cognitive difficulties	Difficulty CONCENTRATING Difficulty THINKING CLEARLY Difficulty FOCUSING ATTENTION	N/A	N/A	N/A	N/A
																		Questionnaire,		Closed		Beck Depression Inventory BDI-PC		Beck Depression Inventory															TFI Prototype 2	Tinnitus Functional Index - prototype 2			Interference with Rest and relaxation	Difficulties relaxing	Interferes—QUIET RESTING ACTIV. Interferes—ABILITY TO RELAX Interferes—PEACE & QUIET	N/A	N/A	N/A	N/A
																																							TFI Prototype 2	Tinnitus Functional Index - prototype 2			Interference with Hearing	Negative effects on hearing	Interferes—Ability to HEAR CLEARLY Interferes—Ability to UNDERSTAND PEOPLE Interferes—Ability to FOLLOW CONVERSATIONS	N/A	N/A	N/A	N/A
																																							TFI Prototype 2	Tinnitus Functional Index - prototype 2			Sleep interference	Sleep difficulties	Difficult to FALL/STAY ASLEEP Difficult to GET ENOUGH SLEEP Difficult to SLEEP DEEPLY or PEACEFULLY	N/A	N/A	N/A	N/A
														Stage 4 validation of 25-item TFI based on prototype 2 data				Questionnaire,		Closed		Tinnitus Functional Index	Tinnitus Functional Index		347	Patients		secondary care services	60.2	11.8	22-90	Male and female	less than 1 year to more than 20 years	both	not stated		not stated		Final TFI	Tinnitus Functional Index			Intrusive	Tinnitus intrusiveness	Over the past week what % of your time awake were you consciously aware of your tinnitus How Strong or loud was your tinnitus What % of your time awake were you annoyed by your tinnitus	N/A	N/A	N/A	N/A
																																							Final TFI	Tinnitus Functional Index			Sense of control	Loss of control	Over the past week did you feel in control of your tinnitus How easy was it for you to cope with your tinnitus How easy was it ofr you to ignore your tinnitus	N/A	N/A	N/A	N/A
																																							Final TFI	Tinnitus Functional Index			Cognitive	Cognitive difficulties	Over the past week how much did your tinnitus interfere with your abilty to concentrate Your ability to Think Clearly Your ability to focus attention	N/A	N/A	N/A	N/A
																																							Final TFI	Tinnitus Functional Index			Sleep	Sleep difficulties	Over the past week how often didid your tinnitus make it difficult to FALL ASLEEP or STAY ASLEEP How often did your tinnitus cause you difficulty in getting AS MUCH SLEEP as you needed How much of the time did your tinnitus keep you from SLEEPING as DEEPLY or as PEACEFULLY as you would have liked?	N/A	N/A	N/A	N/A
																																							Final TFI	Tinnitus Functional Index			Auditory	Negative effects on hearing	Over the PAST WEEK, how much has your tinnitus interfered with… Your ability to HEAR CLEARLY Your ability to UNDERSTAND PEOPLE who are talking? Your ability to FOLLOW CONVERSATIONS in a group or at meetings?	N/A	N/A	N/A	N/A
																																							Final TFI	Tinnitus Functional Index			Relaxation	Difficulties relaxing	Over the PAST WEEK, how much has your tinnitus interfered with… Your QUIET RESTING ACTIVITIES Your ability to RELAX Your ability to enjoy “PEACE AND QUIET”	N/A	N/A	N/A	N/A
																																							Final TFI	Tinnitus Functional Index			Quality of Life	Quality of life (tinnitus)	Over the PAST WEEK, how much has your tinnitus interfered with… Your enjoyment of SOCIAL ACTIVITIES Your ENJOYMENT OF LIFE Your RELATIONSHIPS with family, friends and other people? How often did your tinnitus cause you to have difficulty performing your WORK OR OTHER TASKS, such as home maintenance, school work, or caring for children or others?	N/A	N/A	N/A	N/A
																																							Final TFI	Tinnitus Functional Index			Emotional	Tinnitus-related distress	Over the PAST WEEK How ANXIOUS or WORRIED has your tinnitus made you feel How BOTHERED or UPSET have you been because of your tinnitus How DEPRESSED were you because of your tinnitus	N/A	N/A	N/A	N/A
60	2	2	0	2	6	Tinnitus rehabilitation: a mindfulness meditation cognitive behavioral therapy approach	Sadlier, M; Stephens, S D G, Kennedy, V	sadliermj@cardiff.ac.uk	Wales, United Kingdom	journal article		122; 2008	not stated	To investigate the effects of cognitive behavioural therapy and meditation in tinnitus patients	Invention studies		A waiting list control design	Questionnaire,		Closed	0	Tinnitus Questionnaire (33-item)	Tinnitus Questionnaire (33-item)		25	Patients		secondary care services	Active = 60	Active = 14.6	not stated	Male and female	Active = 8.5 (SD: 6.9)	not stated	not stated	Control TQ = 52, Active TQ = 55	Severe (no SD)	none stated	Tinnitus Questionnaire	Tinnitus Questionnaire			Subjective severity of tinnitus	cannot code	N/A	N/A	N/A	N/A	N/A
																		Questionnaire,		Closed		Hospital Anxiety and Depression Scale (Snaith, 2003)		Hospital Anxiety and Depression scale					Control = 54.3,	Control = 15.3,			Control = 8 (SD: 6.3),						Tinnitus Questionnaire	Tinnitus Questionnaire			Pessimism/helplessness	Negative thoughts	Highly significant changes in pessimism (p=0.001) and acceptance (p=0.002) variables of modified TQ as well as the tinnitus VAS (p=0.007) reflected ability and confidence that patients had, to make a real difference to their tinnitus on both the psychological and physiological levels.	N/A	N/A	N/A	N/A
																		Questionnaire,		Closed		Tinnitus visual Analogue Scale (VAS) - overall effect your tinnitus is having at present	Patient-reported numerical rating scales overall effect on tinnitus																Tinnitus Questionnaire	Tinnitus Questionnaire			Capacity to ignore tinnitus	Ability to ignore	N/A	N/A	N/A	N/A	N/A
																		Questionnaire,		Closed		The satisfaction with life scale (Pavot et al., 1991)		satisfaction with life scale															Tinnitus Questionnaire	Tinnitus Questionnaire			Relaxation	Difficulties relaxing	N/A	N/A	N/A	N/A	N/A
																		Questionnaire,		Closed		Author-developed post-therapy questionnaire		author's own															Tinnitus Questionnaire	Tinnitus Questionnaire			Emotional effects of tinnitus	Tinnitus-related distress	N/A	N/A	N/A	N/A	N/A
																		Questionnaire,																					Tinnitus Questionnaire	Tinnitus Questionnaire			effects on hearing	Negative effects on hearing	N/A	N/A	N/A	N/A	N/A
																																							Tinnitus Questionnaire	Tinnitus Questionnaire			Acceptance of tinnitus	Acceptance of tinnitus	Highly significant changes in acceptance (p=0.002)	N/A	N/A	N/A	N/A
																																							Tinnitus VAS	Patient-reported numerical rating scales distress			Overall effect of tinnitus	Tinnitus-related distress	N/A	N/A	N/A	N/A	N/A
																																							Tinnitus trigger questionnaire	Tinnitus Triggers Questionnaire			stressors associated with onset or exacerbation of tinnitus	cannot code	77% patients highlighted stressful life events associated with onset or exacerbation of tinnitus. Most commonly cited factors were illness or death in the family and occupational change, mainly retirement. Worsening in their perception of tinnitus had all suffered major stressors subsequent to treatment.	N/A	N/A	N/A	N/A
61	2	2	0	0	4	Neuromonics Tinnitus Treatment: Thrid Clinical Trial	Davis, Paul B.; Paki, Bardia.; Hanley, Peter J.	p.b.davis@curtin.edu.au	Australia	journal article		2007-04-01		1. to demonstrate the effectiveness of the treatment, when enhanced with various modifications since previously reported trials. 2. To determine which of two variations of the approach is more effective: a one-stage protocol, in which subjects experience intermittent tinnitus perception throughout treatment, and a two-stage protocol, in which the tinnitus perception is covered up to ahigh degree …	Invention studies	Neuromonics Tinnitus Treatment (p.242)	not stated	Questionnaire,		Closed	0	Tinnitus Reaction Questionnaire	Tinnitus Reaction Questionnaire		35	Patients		secondary care services	58.5	13.4	22-87	Male and female	11 (SD: 11.3)	not stated	not stated	Mean TRQ = 35.5 (SD: 14.4)	No grading system	none stated	Tinnitus Reaction Questionnaire	Tinnitus Reaction Questionnaire			tinnitus-related disturbance (lifestyle disturbance)	Quality of life (tinnitus)	N/A	N/A	N/A	N/A	N/A
																		Other (please specify)	Visual Analog Scale	Closed		Visual Analogue Scales - to quantify tinnitus severity, general relaxation levels and loudness sensitivity	Patient-reported numerical rating scales tinnitus severity					general public											Visual Analogue Scales	Patient-reported numerical rating scales tinnitus severity			tinnitus severity	cannot code	how much it affects subjects lifestyle	N/A	N/A	N/A	N/A
																		Other (please specify)	Visual Analog Scale	Closed		Visual Analogue Scales - to quantify tinnitus severity, general relaxation levels and loudness sensitivity	Patient-reported numerical rating scales tinnitus loudness																Visual Analogue Scales	Patient-reported numerical rating scales general relaxation			general level of relaxation	Difficulties relaxing	pretherapy anchored at 5 - assume your general level of relaxation at the start was 5…	N/A	N/A	N/A	N/A
																		Other (please specify)	Visual Analog Scale	Closed		Visual Analogue Scales - to quantify tinnitus severity, general relaxation levels and loudness sensitivity		Patient-reported numerical rating scales general relaxation															Visual Analogue Scales	Patient-reported numerical rating scales tinnitus loudness			tinnitus awareness	Tinnitus awareness	mean percentage of the time that subjects reported having been aware of their tinnitus over the previous week. One stage group = 98% of time aware, Two-stage group = 88% awareness - baseline in figure	N/A	N/A	N/A	N/A
																																							Treatment Completion Survey - perceived benefit	Author's own			Cope with tinnitus	Difficulties coping	over 50% reported large degree of benefits. Benefits they felt they had achieved were at least moderate in degree in their ability to cope with tinnitus, their sense of control over their tinnitus, relief from tinnitus, their ability to get a good nights sleep or relax, and the extent to which their general well-being improved	N/A	N/A	N/A	N/A
																																							Treatment Completion Survey - perceived benefit	Author's own			relief from tinnitus	cannot code	N/A	N/A	N/A	N/A	N/A
																		Questionnaire,		Closed		Hawkins et al technique (Hawkins et al., 1987) - subjects instructed to point to the phrase on the list that described how loud each level of sound appeared to them (9-point scale)	Author's own																Treatment Completion Survey - perceived benefit	Author's own			control over tinnitus	Loss of control	over 50% reported large degree of benefit	N/A	N/A	N/A	N/A
																		Questionnaire,		Closed		Treatment Completion Survey - perceived benefit on eight different aspects of their tinntius experience and general well-being (4-point scale)	Author's own																Treatment Completion Survey - perceived benefit	Author's own			disturbed by tinnitus	Annoyance	N/A	N/A	N/A	N/A	N/A
																																							Treatment Completion Survey - perceived benefit	Author's own			general well-being	Health-related quality of life	over 50% reported large degree of benefit	N/A	N/A	N/A	N/A
																																							Treatment Completion Survey - perceived benefit	Author's own			Relax	Difficulties relaxing	N/A	N/A	N/A	N/A	N/A
																																							Treatment Completion Survey - perceived benefit	Author's own			Nights sleep	Sleep difficulties	over 50% reported large degree of benefit	N/A	N/A	N/A	N/A
																																							Treatment Completion Survey - perceived benefit	Author's own			fall asleep	Sleep difficulties	N/A	N/A	N/A	N/A	N/A
62	2	2	0	2	6	Distinguishing levels of tinnitus distress	Andersson, G.; Lyttkens, L.; Larsen, H.C.	gerhard.andersson@psyk.uu.se	Sweden	journal article		24; 1999	1988-1995	The purposes of this study were (1) to report data from a structured tinnitus interview; (2) to assess the inter-rater reliability of the Klockhoff and Lindblom grading system; and (3) to investigate parameters that my discriminate further between tinnitus of grade II and III beyond the criteria used for classification	non-interventional		not stated	Interviews		Closed	0				216	Patients		secondary care services	50.6	13.8	14-77	Male and female	7 (SD: 7.5)	not stated	both	Klockhoff and Lindblom classification Grade I (5%) Grade II (57%) and Grade III (38%)	complete grading system	none stated	Structured tinnitus interview	Structured Tinnitus Interview			influence of background sounds or noises Q11	Concentration difficulties	yes/no	N/A	N/A	N/A	N/A
																																							Structured tinnitus interview	Structured Tinnitus Interview			Most problematic situation Q14	cannot code	in silence (18%), conversation/noise (26%), Sleep (26%), Stess 22.5%)	N/A	N/A	N/A	N/A
																																							Structured tinnitus interview	Structured Tinnitus Interview			avoidance of situations because of tinnitus Q16	Negative impact on activities	yes (62%)	N/A	N/A	N/A	N/A
																																							Structured tinnitus interview	Structured Tinnitus Interview			psychological consequences Q20	Tinnitus-related distress	Irritation (69%), depression (58%), Anxiety (27%), concentration difficulties (70%)	N/A	N/A	N/A	N/A
																																							Structured tinnitus interview	Structured Tinnitus Interview			Sleep problems Q25	Sleep difficulties	yes (71%)	N/A	N/A	N/A	N/A
63	1	2	0	0	3	The effects of reassurance, relaxation training and distraction on chronic tinnitus sufferers	Jakes, SC.; Hallam, RS.; Rachman, S.; Hinchcliffe, R.	not stated	United Kingdom	journal article		24(5); 1986	not stated	the present study was designed to test: 1) the effects of providing basic information about tinnitus and an orientation towards acceptance of the noises; 2) the effects of the above, followed by either relaxation training, or relaxation training plus an attention-switching technique and; 3) the responses to two different therapists	Invention studies		not stated	Questionnaire,		Closed	0	Tinnitus Effects Questionnaire	Tinnitus Effects Questionnaire		24	Patients		secondary care services	55	not stated	not stated	Male and female	1.6 - 5.3 years	both	not stated	not stated	not stated	none stated	Tinnitus Effects Questionnaire	Tinnitus Effects Questionnaire			Emotional distress	Tinnitus-related distress	The ‘non-improver’ group were distinguished by higher pre-treatment scores on the following variables: ‘distress’ (TEQD) (P = 0.02); ‘hearing difficulties’ (P = 0.05); ‘Intrusiveness’ ‘TQI’ (0.02); weekly average loudness (P = 0.01); weekly average annoyance (P = 0.005); number of high annoyance ratings (P = 0.05); average loudness ratings for the morning (P =0.l0), afternoon (P = 0.02) and eveni…	N/A	N/A	N/A	N/A
																		Questionnaire,		Closed		Interference with daily activities (IWDA)		Interference with daily activities																			sleep disturbance	Sleep difficulties	The ‘non-improver’ group were distinguished by higher pre-treatment scores on the following variables: ‘distress’ (TEQD) (P = 0.02); ‘hearing difficulties’ (P = 0.05); ‘Intrusiveness’ ‘TQI’ (0.02); weekly average loudness (P = 0.01); weekly average annoyance (P = 0.005); number of high annoyance ratings (P = 0.05); average loudness ratings for the morning (P =0.l0), afternoon (P = 0.02) and eveni…	N/A	N/A	N/A	N/A
																		Other (please specify)	diary	Closed		Daily dairy of the loudness and annoyance of tinnitus (7-point scale). Noted whether or not they had difficulty falling asleep or woke up in the night	Patient-reported numerical rating scales annoyance																				Intrusiveness	Tinnitus intrusiveness	The ‘non-improver’ group were distinguished by higher pre-treatment scores on the following variables: ‘distress’ (TEQD) (P = 0.02); ‘hearing difficulties’ (P = 0.05); ‘Intrusiveness’ ‘TQI’ (0.02); weekly average loudness (P = 0.01); weekly average annoyance (P = 0.005); number of high annoyance ratings (P = 0.05); average loudness ratings for the morning (P =0.l0), afternoon (P = 0.02) and eveni…	N/A	N/A	N/A	N/A
																		Questionnaire,				Daily dairy of the loudness and annoyance of tinnitus (7-point scale). Noted whether or not they had difficulty falling asleep or woke up in the night	Patient-reported numerical rating scales tinnitus loudness																				Hearing difficulties	Negative effects on hearing	The ‘non-improver’ group were distinguished by higher pre-treatment scores on the following variables: ‘distress’ (TEQD) (P = 0.02); ‘hearing difficulties’ (P = 0.05); ‘Intrusiveness’ ‘TQI’ (0.02); weekly average loudness (P = 0.01); weekly average annoyance (P = 0.005); number of high annoyance ratings (P = 0.05); average loudness ratings for the morning (P =0.l0), afternoon (P = 0.02) and eveni…	N/A	N/A	N/A	N/A
																		Questionnaire,		Closed		Hamilton rating scale for depression (HD; Hamilton, 1967)		Hamilton rating scale for depression															Interference with daily activities	Interference with daily activities			Interference with daily activities	Negative impact on individual activities	e.g. ability to concentrate, listen to music or read newspapers	N/A	N/A	N/A	N/A
																				Closed		Experimental Index (CCEI; Crown & Crisp, 1979)		Experimental Index															Daily diary	Patient-reported numerical rating scales tinnitus loudness			loudness	Tinnitus loudness	Mean value = 4.26	N/A	N/A	N/A	N/A
																		Questionnaire,		Closed		Insomnia items on hamilton scale		Hamilton rating scale for depression																Patient-reported numerical rating scales annoyance			annoyance	Annoyance	mean value = 3.95	N/A	N/A	N/A	N/A
64	1	2	0	2	5	Tinnitus Reaction Questionnaire: Psychometric properties of a measure of distress associated with tinnitus	Wilson, PH.; Henry, J.; Bowen, M.; Haralambous, G.	not stated	Australia	journal article		1991-02-01	not stated	the purpose of the present paper is to decribe the development and psychometric properties of the Tinnitus Reaction Questionnaire (TRQ).	non-interventional		not stated	Questionnaire,		Closed	0	Tinnitus Reaction Questionnaire (TRQ)	Tinnitus Reaction Questionnaire		156	Patients		secondary care services	58.6	not stated	24-80	Male and female	9.4	not stated	not stated	TRQ = 32.49 (SD: 2.71)	No grading system	none stated	Tinnitus Reaction Questionnaire	Tinnitus Reaction Questionnaire			general distress	Tinnitus-related distress	feeling angry, annoyed, despair, helpless, think about suicide	N/A	N/A	N/A	N/A
																		Questionnaire,		Closed		Bendig-Taylor version of the Taylor Manifest Anxiety Scale (Bendig, 1956)		Taylor Manifest Anxiety Scale				general public											Tinnitus Reaction Questionnaire	Tinnitus Reaction Questionnaire			interference with work and leisure activities	Negative impact on activities	interfered with work, less interested in going out	N/A	N/A	N/A	N/A
																		Questionnaire,		Closed		Neuroticism subscale of Eysenck Personality Questionnaire (Eysenck & Eysenck, 1975)		Eysenck Personality Questionnaire															Tinnitus Reaction Questionnaire	Tinnitus Reaction Questionnaire			severe signs of distress	Tinnitus-related distress	interfered with sleep, feeling that "tinnitus has driven me crazy"	N/A	N/A	N/A	N/A
																		Questionnaire,		Closed		Beck Depression Inventory (Beck et al, 1961)		Beck Depression Inventory															Tinnitus Reaction Questionnaire	Tinnitus Reaction Questionnaire			avoidance of activities	Negative impact on social life	avoid noisy situations, avoid social situations, less interested in going out	N/A	N/A	N/A	N/A
																		Questionnaire,		Closed		Spielberger State-trait Anxiety Inventory (Speilberger et al., 1970)		State Trait Anxiety Inventory																						N/A	N/A	N/A	N/A
65	1	2	0	2	5	EMG biofeedback in the treatment of tinnitus: an experimental evaluation	Haralambous, G.; Wilson, PH.; Platt-Hepworth, S.; Tonkin, JP.; Hensley, R.; Kavanagh, D.	not stated	Australia	journal article		25(1); 1987	not stated	The present study was designed in order to clarify the issues raised by th Ireland et al. study. EMG biofeedback was selected aas the therapy method to be evaluated since this procedure has been employed in most of the previous reports and has been claimed to produce beneficial results.	Invention studies		not stated	Questionnaire,		Closed	0	Daily tinnitus monitoring: three types of ratings on 5-point scale: 1) how often tinntius was noticed (tinnitus awareness); 2) maximum loudness; 3) tinnitus annoyance	Patient-reported numerical rating scales awareness		26	Patients		secondary care services	50.9	not stated	25-76	Male and female	8.5 (range: 1 mth - 35yrs)	not stated	not stated	TRQ = 33.3 (SD: 23.7)	No grading system	none stated	Daily tinnitus monitoring	Patient-reported numerical rating scales awareness			Tinnitus awareness	Tinnitus awareness	N/A	N/A	N/A	N/A	N/A
																						Daily tinnitus monitoring: three types of ratings on 5-point scale: 1) how often tinntius was noticed (tinnitus awareness); 2) maximum loudness; 3) tinnitus annoyance	Patient-reported numerical rating scales maximum loudness					general public											Daily tinnitus monitoring	Patient-reported numerical rating scales maximum loudness			Tinnitus loudness	Tinnitus loudness	N/A	N/A	N/A	N/A	N/A
																						Daily tinnitus monitoring: three types of ratings on 5-point scale: 1) how often tinntius was noticed (tinnitus awareness); 2) maximum loudness; 3) tinnitus annoyance	Patient-reported numerical rating scales annoyance																Daily tinnitus monitoring	Patient-reported numerical rating scales annoyance			Tinnitus annoyance	Annoyance	N/A	N/A	N/A	N/A	N/A
																		Questionnaire,		Closed		Sleep-onset difficulty (5-point scale)		Patient-reported numerical rating scales sleep															Sleep-onset difficulty (5-point scale)	Patient-reported numerical rating scales sleep			Sleep difficulty	Sleep difficulties	N/A	N/A	N/A	N/A	N/A
																		Questionnaire,		Closed		Tinnitus Reaction Questionnaire (TRQ)	Tinnitus Reaction Questionnaire																Tinnitus Reaction Questionnaire (TRQ)	Tinnitus Reaction Questionnaire			severity of distress caused by tinnitus	Tinnitus-related distress	N/A	N/A	N/A	N/A	N/A
																		Questionnaire,		Closed		Beck Depression Inventory (Beck et al, 1961)		Beck Depression Inventory																					N/A	N/A	N/A	N/A	N/A
																		Questionnaire,		Closed		Spielberger State-trait Anxiety Inventory (Speilberger et al., 1970)		State Trait Anxiety Inventory																					N/A	N/A	N/A	N/A	N/A
66	2	2	0	2	6	Tinnitus characteristics in tinnitus complainers and noncomplainers	Hallberg, LRM.; Erlandsson, SI.	not stated	Sweden	journal article		27; 1993	not stated	The purpose of this study was to describe the characteristics of tinnitus by contrasting two different groups of patients; those actively seeking professional help for their tinnitus (complainers) and those reporting having tinnitus, but who do not actively seek help for their tinnitus symptms noncomplainers).	non-interventional		not stated	Questionnaire,		Closed	0	author-developed self-administered questionnaire including assessment of psychological dimensions of perceived tinnitus severity, variability of tinnitus, duration of tinnitus and perceived loclization of tinnitus, assessment of frequency of headache and bruxism.	Author's own		87	Patients		secondary care services	Complainers: 54.5, noncomplainers: 53	noncomplainers: 5.3	complainers: 28-69	Male and female	10.9 (SD: 11.0)	not stated	not stated	not stated	not stated	none stated	author-developed self-administered questionnaire	Author's own			Concentration difficulties	Concentration difficulties	complainers scored significantly higher (p<0.0001) on concentration difficulties, irritability and sleep disturbance than did noncomplainers	N/A	N/A	N/A	N/A
																																							author-developed self-administered questionnaire	Author's own			Irritability	Irritable	N/A	N/A	N/A	N/A	N/A
																																							author-developed self-administered questionnaire	Author's own			Sleep difficulty	Sleep difficulties	N/A	N/A	N/A	N/A	N/A
67	2	2	0	0	4	Sleep complaints in Elderly tinnitus patients: A controlled study	Hebert, S.; Carrier, J.	sylvie.hebert@umontreal.ca	Canada	journal article		28(5); 2007	not stated	To investigate sleep complaints in a group of well-screened elderly tinnitus patients and a control group without tinnitus.	non-interventional		A controlled study	Questionnaire,		Closed	0	Pittsburgh Sleep Quality Index		Pittsburgh Sleep Quality Index	51	Patients	51 control	general public	67.96	6.43	not stated	Male and female	14 (SD: 12.2)	not stated	not stated	TRQ = 17.39 (SD: 18.04)	No grading system	none stated	Pittsburgh Sleep Quality Index	Pittsburgh Sleep Quality Index			Sleep efficiency	Sleep difficulties	tinnitus patients showed poorer sleep efficiency compared with the control group (p<0.05)	N/A	N/A	N/A	N/A
																		Questionnaire,		Closed		Beck's Depression Inventory (BDI-II)		Beck Depression Inventory															Pittsburgh Sleep Quality Index	Pittsburgh Sleep Quality Index			Sleep quality	Sleep difficulties	tinnitus patients showed poorer sleep Quality compared with the control group (p<0.05)	N/A	N/A	N/A	N/A
																		Questionnaire,		Closed		Hyperacusis Questionnaire (HQ)		Hyperacusis Questionnaire															Beck's Depression Inventory (BDI-II)	Beck Depression Inventory			Irritability due to tinnitus	Irritable	N/A	N/A	N/A	N/A	N/A
																		Questionnaire,		Closed		Tinnitus Reaction Questionnaire (TRQ)	Tinnitus Reaction Questionnaire																author-developed self-administered questionnaire	Author's own			Tinnitus-related distress	Tinnitus-related distress	N/A	N/A	N/A	N/A	N/A
																		Questionnaire,		Closed		author-developed self-administered questionnaire		author's own															Tinnitus Reaction Questionnaire (TRQ)	Tinnitus Reaction Questionnaire					N/A	N/A	N/A	N/A	N/A
68	2	2	0	2	6	Psychological aspects of tinnitus: A comparison with hearing loss and ear, nose and throat disorders.	Rutter, DR.; Stein, MJ.	D.R.Rutter@ukc.ac.uk	United Kingdom	journal article		14; 1999	not stated	To determine whether the problems are specific to tinnitus patients, are general across both tinnitus and hearing loss patients, or are a feature of a wide variety of patients with ENT problems. The second aim of the study is to examine tinnitus patients more closely, by dividing them into sub-groups.	non-interventional		not stated	Questionnaire,		Closed	0	Author-developed questionnaire: demography, patients clinical problem. The questions probed how long the patient had been aware of the problem, whether it was constant or intermittent, whether it had changed, whether it bothered the patent or caused irritation or annoyance, whether it led to loss of sleep, whether it had been treated and if so how.	Author's own		240	Patients		secondary care services	Tinnitus = 58.6, Hearing loss = 68.4, ENT control = 48.0	Tinnitus = 13.9, Hearing loss = 16.9, ENT control = 16.0	not stated	Male and female	Tinnitus = 4.4 (SD: 0.8), Hearing loss = 3.9 (SD: 1.1), ENT control = 3.4 (SD: 1.4)	both	not stated	not stated only TQ subscales reported	not stated	Hearing loss	short Tinnitus Questionnaire (Hallam, 1996 - 33 item)	Tinnitus Questionnaire (33-item)			emotional distress	Tinnitus-related distress	N/A	N/A	N/A	N/A	N/A
																		Questionnaire,		Closed		short Tinnitus Questionnaire (Hallam, 1996 - 33 item)	Tinnitus Questionnaire (33-item)																short Tinnitus Questionnaire (Hallam, 1996 - 33 item)	Tinnitus Questionnaire (33-item)			auditory perceptual difficulties	Negative effects on hearing	auditory perceptual difficulties, the tinnitus group with no HL reported significantly less disturbance than the other two groups, which weren't significantly different from each other.	N/A	N/A	N/A	N/A
																		Questionnaire,		Closed		Hospital Anxiety and Depression Scale (Zigmond & Snaith, 1983)		Hospital Anxiety and Depression scale															short Tinnitus Questionnaire (Hallam, 1996 - 33 item)	Tinnitus Questionnaire (33-item)			irrational beliefs	Irrational beliefs	tinnitus group with no HL were also the least likely to report irrational beliefs	N/A	N/A	N/A	N/A
																		Questionnaire,		Closed		short version of Eysenck Personality Questionnaire (Eysenck & Eysenck, 1991		Eysenck Personality Questionnaire (short version)															short Tinnitus Questionnaire (Hallam, 1996 - 33 item)	Tinnitus Questionnaire (33-item)			sleep disturbances	Sleep difficulties	N/A	N/A	N/A	N/A	N/A
																																							Hospital Anxiety and Depression Scale (Zigmond & Snaith, 1983)	Hospital Anxiety and Depression scale			Anxiety	Anxiety	Scores of 11 or more anxiety ot be considered cases. For anxiety there was a significant effect. A total of 44.6% of tinnitus patients counted as cases, against 9.8% for the hearing loss group and 29.2% for the ENT control group	N/A	N/A	N/A	N/A
69	2	2	0	0	4	Outcomes of Clinical trial: Tinnitus masking versus Tinnitus Retraining Therapy	Henry, James A	james.henry@med.va.gov	United States	journal article		2006	not stated	to evaluate prospectively the clinical efficacy of tinnitus masking and tinnitus retraining therapy in military veterans having clinically significant tinnitus	Invention studies			Questionnaire,		Closed	0	Tinnitus Handicap Inventory	Tinnitus Handicap Inventory		123	Patients		secondary care services	61.0 and 58.7 in each group	9.6 and 10.5 in each group	not stated	Male and female	not stated	not stated	not stated	not stated	not stated	none stated	Visual Analogue Scale	Patient-reported numerical rating scales awareness			tinnitus awareness	Tinnitus awareness	percentage of time aware of tinnitus	N/A	N/A	N/A	N/A
																				Closed		Tinnitus Handicap Questionnaire	Tinnitus Handicap Questionnaire																Visual Analogue Scale	Patient-reported numerical rating scales annoyance			tinnitus Annoyance	Annoyance	percentage of time annoyed by tinnitus	N/A	N/A	N/A	N/A
70	0	0	0	2	2	Manual of the Tinnitus Questionnaire (TQ)	Hallam, RS	not stated	United Kingdom	report		not states	not stated	not really stated, but its a psychometric evaluation of the TQ	non-interventional			Questionnaire,		Closed	0	Tinnitus Questionnaire	Tinnitus Questionnaire		103	Patients		secondary care services	not stated	not stated	not stated	not stated	not stated	not stated	not stated	not stated	not stated	none stated	Tinnitus Questionnaire	Tinnitus Questionnaire			emotional distress	Tinnitus-related distress	a collection of worries about the persistence of the noises and their significance for mental and physical health, an inability to cope, a low mood, irritability and anger, and a sense of unfairness and victimisation	N/A	N/A	N/A	N/A
																																							Tinnitus Questionnaire	Tinnitus Questionnaire			intrusiveness	Tinnitus intrusiveness	noises are perceived as loud and unrelenting, constantly intruding into awareness and as inescapable and impossible to ignore	N/A	N/A	N/A	N/A
																																							Tinnitus Questionnaire	Tinnitus Questionnaire			auditory perceptual difficulties	Negative effects on hearing	the effect of tinnitus on the ability to converse, to discriminate speech and appreciate music, and to locate sounds	N/A	N/A	N/A	N/A
																																							Tinnitus Questionnaire	Tinnitus Questionnaire			sleep disturbance	Sleep difficulties	problems in getting to sleep, waking in the night, and early morning wakening	N/A	N/A	N/A	N/A
																																							Tinnitus Questionnaire	Tinnitus Questionnaire			somatic complaints	Bodily complaints	ear or head pain, muscle tension especially in the face or neck	N/A	N/A	N/A	N/A
71	2	2	0	2	6	The relationship between tinnitus	James G Jackson	i. G. Jackson@hull. ac. Uk	United Kingdom	postgraduate dissertation		1905-06-27		The relationship between tinnitus, congnitive performance and demands on the individual Overall title							0																								N/A	N/A	N/A	N/A	N/A
														Study 1	non-interventional			Questionnaire,		Closed		Subjective Tinnitus Severity Scale (STSS) 16 item yes/no questionnaire (administered to tinnitus sufferers only)	Subjective Tinnitus Severity Scale		40	Patients	Members of the Hull Self-Help Tinnitus support group	non-clinical	50.1	19.9	Not stated	Male and female	Not stated	not stated	not stated	Grade II or Grade III severity as defined by the grading system of Klockhoff and Lindblom (1967). 5 of the total sample (25%) had severe tinnitus	grade II - grade III	none stated	Subjective Tinnitus Severity Scale (STSS) 16 item yes/no questionnaire (administered to tinnitus sufferers only)	Subjective Tinnitus Severity Scale			Tinnitus severity	cannot code	mean score of 7.90 (sd. 3.24), with scores stretching from 3-12. Overall, this indicates that the majority of the tinnitus group complained of a moderate (subjective) tinnitus. Five articipants (25%) classified themselves as suffering from severe tinnitus; i. e. a score of 12	N/A	N/A	N/A	N/A
																		Questionnaire,		Closed		Tinnitus Cognitions Questionnaire (TCQ) 26 items rated on a 0-4 Likert scale (administered to tinnitus sufferers only)	Tinnitus Cognitions Questionnaire																Tinnitus Cognitions Questionnaire (TCQ) 26 items rated on a 0-4 Likert scale (administered to tinnitus sufferers only)	Tinnitus Cognitions Questionnaire			negative cognitions	Negative thoughts	This total value is lower than the 47.16 (s. d. = 16.20) found by Wilson and Henry (1998) in their original development of the questionnaire. While this indicates that these tinnitus sufferers engage in negative thought processes, the sample differs from the literature, engaging in more positive processes than would be normally expected. Taken alongside the STSS results, it must be concluded that…	N/A	N/A	N/A	N/A
																		Questionnaire,		Closed		General Tiredness Questionnaire (GTQ) Earle 2004)		General Tiredness Questionnaire															State Fatigue Inventory (SFI)	State Fatigue Inventory			Tired	Feeling tired	The Tinnitus group were more tired at the start of the series of experiments but did not get more tired afterwards. The control group group were less tired before and more tired after	N/A	N/A	N/A	N/A
																		Questionnaire,		Closed		Hospital Anxiety and Depression Scale (HADS)		Hospital Anxiety and Depression scale																						N/A	N/A	N/A	N/A
																		Questionnaire,		Closed		Mental Toughness Questionnaire (MTQ48)		Mental Toughness Questionnaire																						N/A	N/A	N/A	N/A
																		Questionnaire,		Closed		State Fatigue Inventory (SFI)		State Fatigue Inventory																						N/A	N/A	N/A	N/A
72	2	2	0	2	6	Positive and Negative thinking in tinnitus: Factor structure of the Tinnitus Cognitions Questionnaire	Lucy E. Handscomb, Deborah A. Hall, Gillian W. Shorter, Derek J. Hoare	l.handscomb@ucl.ac.uk	UK	journal article		2016	not stated	The present study used data from a sample of people with tinnitus from the general UK population (1) to investigate the psychometric properties of the TCQ, in particular if the factor structure proposed by Wilson and Henry holds, and if the subscales are reliable and (2) to determine if scores on these factors differ between groups of people with different degrees of self-rated tinnitus severity.	Cross-sectional/non-interventional		not stated	Questionnaire		Closed	0	Tinnitus Cognitions Questionnaire	Tinnitus Cognitions Questionnaire		342	patients		non-clinic	55	13,3	N/A	185 (54.3%) were male; 138 (45.7%) were female	14 (13,7)	not stated	not stated	mean TCQ 43.86 (SD = 17.20)	No grading system	none stated	Tinnitus Cognitions Questionnaire	Tinnitus Cognitions Questionnaire	N/A	N/A	Tinnitus-related distress	Tinnitus-related distress	N/A	N/A	N/A	N/A	N/A
																																											Negative thinking	Negative thoughts	If only the noise would go away; my tinnitus is never going to get better; if only I could get some peace and quiet	N/A	N/A	N/A	N/A
																																											Positive thinking	Difficulties coping (is positive thinking the same as difficulties coping)	I tell myself "It will help if I try to think of something pleasant"; I tell myself "Think of something else other than the noise"
73	2	2	0	2	6	A russian Adaptation of the tinnitus handicap inventory	Yahav Oron, Nataliya V Sergeeva, Mazen Kazlak, Irina Barbalat, Stanislav Spevak, Andrey S. Lopatin, Yehudah Roth	oron.yahav@gmail.com	Russia	journal article		2015	not stated	This study was set to establish a tinnitus severity questionnaire with the THI-E being the original one.	other	questionnaire validation		Questionnaire		Closed	0	Tinnitus Handicap Inventory (Russian)	Tinnitus Handicap Inventory (Russian)		50	patients		secondary care services	49.78	14,36	25 to 84	31 female and 19 male	4,95 (range 0.5 to 25, SD 4.91 years).	not stated	not stated	not stated	not stated	hearing loss			N/A	n/A	Negative thinking	Negative thoughts	“if only the noise would go away” (M = 2.60, SD = 1.20); “my tinnitus is never going to get better” (M = 2.56, SD = 1.32); “if only I could get some peace and quiet” (M = 2.39, SD =1,31)	N/A	N/A	N/A	N/A
																						Subjective tinnitus loudness (10-point scale)	Patient-reported numerical rating scales tinnitus loudness																Subjective tinnitus loudness (10-point scale)	Patient-reported numerical rating scales tinnitus loudness			Perceived tinnitus loudness	Tinnitus loudness		N/A	N/A	N/A	N/A
																						Beck's Depression Inventory (revised) Beck and Steer 1987		Beck Depression Inventory (Russian)															Beck's Depression Inventory (revised) Beck and Steer 1987	Beck Depression Inventory (Russian)			Depression	Depression		N/A	N/A	N/A	N/A
																						Spielberger State-trait Anxiety Inventory (Speilberger et al., 1977)		State Trait Anxiety Inventory (Russian)
74	2	2	0	0	4	Electric navigated transcranial magnetic stimulation for chronic tinnitus: A pilot study	Hanna Sahlsten, Johan Isohanni, Jorma Haapaniemi, Jaakko Salonen, Janika Paavola, Eliisa Löyttyniemi, Reijo Johansson & Satu K. Jääskeläinen	hanna.sahlsten@hotmail.fi	Finland	online		2015-06-18	autumn 2011 to spring 2013	to evaluate the feasibility and effects of precise E-field navigation according to individual neuroanatomy and tinnitus pitch reflected in the tonotopy of the auditory cortex in patients with long history of severe, intractable, and disabling tinnitus; to evaluate the influence of several factors related to stimulation protocol on the treatment results.	Invention studies		open methodological pilot study	questionnaires	numeric rating scales	Closed	0	numeric rating scale (0-10) of tinnitus intensity for the previous week (in a diary)	Patient-reported numerical rating scales tinnitus loudness		13	patients		secondary care services	53		30-73	3 woman, 10 men	> 1 year	not stated	not stated	severe (intensity at least 5/10 on the NRS sclae)	severe (no mean)	none stated	numeric rating scale (0-10) of tinnitus intensity for the previous week (NRS scale)	Patient-reported numerical rating scales tinnitus loudness			Tinnitus intensity	Tinnitus loudness		N/A	N/A	N/A	N/A
																						numeric rating scale (0-10) of tinnitus annoyance for the previous week (in a diary)	Patient-reported numerical rating scales annoyance																numeric rating scale (0-10) of tinnitus annoyance for the previous week (NRS scale)	Patient-reported numerical rating scales annoyance			Tinnitus annoyance	Annoyance		N/A	N/A	N/A	N/A
																						global impression of change scale (-3 to +3) after a serial rTMS treatment																	global impression of change scale (-3 to +3) after a serial rTMS treatment (GIC scale)				Subjective benefit of the treatment			N/A	N/A	N/A	N/A
75	2	2	1	0	5	Catamnesis results of an inpatient neuro-otologic and psychosomatic tinnitus therapy 1-5 years after discharge	Schaff H.; Weiß S.; Hesse G.	ghesse@tinnitus-klinil.net	Germany	Journal article		21 September 2016	1/10/2009 until 31/9/2014 ( 5 years)	The study was to evaluate whether—beyond the short-term efﬁciency—stable long-term effects could also be seen, which are the effect factors during and following the inpatient therapy.	cross-sectional		not stated	Questionnaire		Closed	0	Hospital Anxiety and Depression scale (HADS)		Hospital Anxiety and Depression scale	169	Patients		secondary care services	56	9.43	24 - 85	Male (113) and female (56)	not stated	not stated	not stated	not stated	not stated	none stated	Hospital Anxiety and Depression scale (HADS-A)(German)	Hospital Anxiety and Depression scale			Generalised anxiety symptoms and occurrence of panic attacks	Anxiety	Generalised anxiety symptoms; occurrence of panic attacks	N/A	N/A	N/A	N/A
																		Other (please specify)	Audiometric measures																				Hospital Anxiety and Depression scale (HADS-D) (German)	Hospital Anxiety and Depression scale			Generalised Depressive symptoms	Depressive symptoms	loss of interest; lack of enjoyment; decreased drive	N/A	N/A	N/A	N/A
																		Questionnaire		Closed		mini Tinnitus Questionnaire (Hiller and Goebel)	mini-Tinnitus Questionnaire (German)																mini Tinnitus Questionnaire (German, Hiller and Goebel)	mini-Tinnitus Questionnaire (German)			Tinnitus stress	Tinnitus-related distress		N/A	N/A	N/A	N/A
76	2	2	0	0	4	Impact of reduction of tinnitus intensity on patients quality of life			Uruguay											Closed	0	Visual Analogue Scale tinnitus annoyance	Patient-reported numerical rating scales tinnitus annoyance		11													none stated	Visual Analogue Scale tinnitus annoyance	Patient-reported numerical rating scales tinnitus annoyance			Tinnitus annoyance	Annoyance		N/A	N/A	N/A	N/A
																				Closed		Tinnitus Handicap Inventory	Tinnitus Handicap Inventory																Tinitus Functional Index	Tinitus Functional Index			Intrusiveness	Tinnitus intrusiveness		N/A	N/A	N/A	N/A
																				Closed		Tinnitus Reaction Questionnaire	Tinnitus Reaction Questionnaire																				Sense of control	Loss of control		N/A	N/A	N/A	N/A
																				Closed		Tinitus Functional Index	Tinitus Functional Index																				Sleep	Sleep difficulties		N/A	N/A	N/A	N/A
																																											Relaxation	Difficulties relaxing		N/A	N/A	N/A	N/A
																																											Emotional	Tinnitus-related distress		N/A	N/A	N/A	N/A
																																											Quality of Life	Quality of life (tinnitus)		N/A	N/A	N/A	N/A
																																							Interview (evaluation by psychologist)		Quality and quantity of sleep	Sleep difficulties			Time to fall asleep; Number of times wake during the night; duration of sleep time	N/A	N/A	N/A	N/A
																																							Interview (evaluation by psychologist)		Anxiety and depression	Anxiety				N/A	N/A	N/A	N/A
																																							Interview (evaluation by psychologist)		Anxiety and depression	Depressive symptoms				N/A	N/A	N/A	N/A
77	2	2	0	2	6	Psychometric properties of a Mandarin version of the tinnitus questionnaire	Zhaoli Meng, Zhenxi Chen, Ke Xu, Gang Li, Yong Tao & Joey Sum-Wing Kwong	Lucy-mengzhaoli@163.com	China	Journal article		18 january, 2016	not stated	This study develop a Mandarin version of the tinnitus questionnaire (MTQ) and determine the reliability and validity, and assess whether it could be used clinically in the Chinese population	other	questionnaire develop and validation	not stated	Questionnaire		Closed	0	Tinnitus Questionnaire (Mandarin Chinese)	Tinnitus Questionnaire (TQ) - Mandarin version	short-form (36) health survey	192	patients		secondary care services	45	15.52	18-83	99 male and 93 female	not stated	continuous in 181 (94.27%) participants; discontinuous in 11 (5.73%) paticipants	not stated	not stated	not stated	none stated	Tinnitus Questionnaire (Mandarin Chinese)	Tinnitus Questionnaire (TQ) - Mandarin version			Emotional distress	Tinnitus-related distress	low mood, worries about tinnitus, and anger	N/A	N/A	N/A	N/A
																				Closed		The Short Form-36 Health Survey (SF-36)/SF-6D		Short Form-36 Health Survey																			Auditory perceptual difficulties	Negative effects on hearing	effects of tinnitus on the patient’s ability to converse, distinguish speech, and locate sounds	N/A	N/A	N/A	N/A
																				Closed		Hospital Anxiety and Depression scale (HADS)		Hospital Anxiety and Depression scale																			Cognitive distress	Cognitive difficulties	negative cognitive distortions due to tinnitus	N/A	N/A	N/A	N/A
																				Closed		Tinitus Handicap Inventory (Mandarin Chinese)	Tinnitus Handicap Inventory (Mandarin Chinese)																				Sleep disturbance	Sleep difficulties	getting to sleep, waking in the night, and early morning awakening	N/A	N/A	N/A	N/A
																				Closed		Visual Analogue Scales of emotional distress, auditory perceptual difficulties, intrusiveness, sleep disturbance, and somatic complaints	Patient-reported numerical rating scales																				Intrusiveness	Tinnitus intrusiveness	‘It will be dreadful if these noises never go away’	N/A	N/A	N/A	N/A
																																							Tinitus Handicap Inventory (Mandarin Chinese)	Tinnitus Handicap Inventory (Mandarin Chinese)			tinnitus-related handicap	cannot code		N/A	N/A	N/A	N/A
																																							Visual Analogue Scale	Patient-reported numerical rating scales			Auditory perceptual difficulties	Negative effects on hearing	Do you have difficulty in listening to others because of tinnitus?	N/A	N/A	N/A	N/A
78	2	2	1	2	7	Relationship between subjective tinnitus perception and psychiatric discomfort	Anna Rita Fetoni Daniela Lucidi Eugenio De Corso Antonella Fiorita Guido Conti Gaetano Paludetti	afetoni@rm.unicatt.it,	Italy	journal article		2016-10-21	march-september 2015	"The first objective of our study was to determine the tinnitus-related degree of distress along with the prevalence of anxiety-depression disorders in a sample of patients. … Furthermore we investigated the correlation among patient’s discomfort, severity of hearing loss and age of the subjects"	non-interventional			questionnaire		Closed	0	Tinitus Handicap Inventory (Italian)	Tinitus Handicap Inventory (Italian)		80	patients		secondary care service	68.2	12.9	36-89	Male and female	6 years and 9 months (6,1)	not stated	not stated	THI 40,85 (29,85)	Slight - Severe	hearing loss	Hospital Anxiety and Depression scale (HADS)	Hospital Anxiety and Depression scale			Anxiety	Anxiety		N/A	N/A	N/A	N/A
																				Closed		Hospital Anxiety and Depression scale (HADS)		Hospital Anxiety and Depression scale																			Depression	Depressive symptoms
																																							Tinitus Handicap Inventory (Italian version)	Tinnitus Handicap Inventory (Italian)			Emotional	Tinnitus-related distress
																																											Functional	Functional difficulties due to tinnitus
																																											Catastrophic	Negative thoughts
																																											Depression	Depressive symptoms		N/A	N/A	N/A	N/A
79	1	2	0	2	5	Benefit of using the prosthesis with sound generators in individuals with tinnitus associated with mild to moderately severe hearing loss	Ana Paula Berberian; Angela Ribas; Danielle Imlau; Ana Cristina Guarinello; Giselle Massi; Rita Tonocchi; Renato Riesemberg; Jackeline Martins; Marine Raquel Diniz Rosa	angela.ribas@utp.br	Brazil	journal article		2013-06-21	August 2014-june 2015	The aim of this study was to describe the findings in a group of people who underwent hearing treatment with sound generators	Other	Descriptive study	"This research is characterized as a descriptive study on an experimental basis"	Questionnaire		Closed	0	Visual Analogue Scale annoyance or discomfort caused by tinnitus	Visual Analogue Scale annoyance or discomfort caused by tinnitus		25	Patients		secondary care services	52.2	not stated	26-61	Male and female	not stated	not stated	not stated	not stated	not stated	aidable hearing loss	Visual Analogue Scale annoyance or discomfort caused by tinnitus	Patient-reported numerical rating scales annoyance			Annoyance or discomfort	Annoyance	Nuisance caused by tinnitus	N/A	N/A	N/A	N/A
																		Questionnaire		Closed		Tinnitus Handicap Inventory	Tinnitus Handicap Inventory																Tinnitus Handicap Inventory	Tinnitus Handicap Inventory			effects of tinnitus on quality of life	Quality of Life (tinnitus)		N/A	N/A	N/A	N/A
80	1	2	0	2	5	The efficacy of hearing aids for emotional and tinnitus issues	Jamile Cabral, Rita Tonocchi, Ângela Ribas, Gleide Almeida, Marine Rosa, Giselle Massi, Ana Paula Berberian	jamilli-2@hotmail.com	Brazil	journal article		2016-04-04	not stated	"To assess the remission of emotional and auditory tinnitus impacts on users of hearing aids"	other	experimental, descriptive	"experimental, descriptive study"	? other	? otorhinolaryngological screening, tonal audiometry, logoaudiometry and acoustic imittance testing	Closed	0	Iowa Tinnitus Activities Questionnaire	Iowa Tinnitus Activities Questionnaire		17	patients		secondary care service	57		26-87	Male and Female	not stated	"41% are sporadic, while 58% are persistent"	not stated	not stated	not stated	hearing loss	Iowa Tinnitus Activities Questionnaire	Tinnitus Activities Questionnaire			Emotion	Tinnitus-related distress		N/A	N/A	N/A	N/A
																		questionnaire		Closed		Tinnitus Handicap Inventory	Tinnitus Handicap Inventory																Iowa Tinnitus Activities Questionnaire				Hearing	Negative effects on hearing
																																											Concentration	Cognitive difficulties
																																							Tinnitus Handicap Questionnaire	Tinnitus Handicap Questionnaire			Emotion	Tinnitus-related distress
																																							Tinnitus Handicap Questionnaire				Hearing	Negative effects on hearing
																																											Concentration	Cognitive difficulties
																																											Sleep	Sleep difficulties
81	2	2	1	2	7	Preliminary longitudinal results of neurophysiological eductation as first and sole intervention for new tinnitus patients	Olav Victor Gerald Wagenaar; Marjan Wieringa; Lia Mantingh; Sophia E. Kramer; Rob Kok	ovwagenaar@gmail.com	The Netherlands	Journal article		2016-04-26	not stated	The primary aim of this evaluation is to investigate whether COT leads to reduction of tinnitus related disabilities in new tinnitus patients.	Other	Descriptive study	not stated	Questionnaire		Closed	0	Tinnitus Handicap Inventory	Tinnitus Handicap Inventory		74	Patients		secondary care services	Only at baseline (n=91 respondres; n=15 non-responders); n=91 mean 54; n=15 mean 47	Only at baseline (n=91 respondres; n=15 non-responders); n=91 sv 12; n=15 sv 11	not stated	Male and Female	not stated	not stated	not stated	47	Moderate?	none stated	Tinnitus Handicap Inventory subscale score	Tinnitus Handicap Inventory			Functional limitations	Functional difficulties due to tinnitus		N/A	N/A	N/A	N/A
																																							Tinnitus Handicap Inventory subscale score	Tinnitus Handicap Inventory			Emotional responses	Tinnitus-related distress
																																							Tinnitus Handicap Inventory subscale score	Tinnitus Handicap Inventory			Catastrophic responses	Negative thoughts
																																							Tinnitus Handicap Inventory global score	Tinnitus Handicap Inventory			Impact of tinnitus on daily living	Quality of life (tinnitus)
82	2	2	0	0	4	Effects of tinnitus treatments on sleep disorders in patient with tinnitus	Satoko Wakabayashi, Hideyuki Saito, Naoki Oishi, Seiichi Shinden, Kaoru Ogawa	oishin@keio.jp	Japan	Journal article		2017	June 2005-August 2008	The aim of this study was to assess whether tinnitus treatments (counselling for tinnitus and the use of sound generators) improved sleep quality in patients with tinnitus.	intervention studies		not stated	Questionnaire		Closed	0	Tinnitus Handicap Inventory	Tinnitus Handicap Inventory		100	Patients		secondary care services	61.6	14.9	not stated	Male and Female	3 yrs and 11 months (89.5 months)	not stated	not stated	THI 54.7 (22.2)	Moderate	none stated	Pittsburgh Sleep Quality Index - Japanese version	Pittsburgh Sleep Quality Index - Japanese version			Sleep quality	Sleep difficulties		N/A	N/A	N/A	N/A
																						Pittsburgh Sleep Quality Index - Japanese version		Pittsburgh Sleep Quality Index (Japanese)															State Trait Anxiety Inventory	State Trait Anxiety Inventory			Anxiety,	Anxiety
																						Self-rating Depression Scale (Zung 1965)		Zung Self-rating Depression Scale
																						State Trait Anxiety Inventory		State Trait Anxiety Inventory (Japanese)
83	2	2	2	0	6	A Randomized, Placebo-Controlled, Double-Blind, Parallel Groups Study Evaluating the Performance and Safety of a. Steady State Coherent Biomodulator Patch in the Treatment of Subjective Tinnitus.	Peter Ahnblad, Anders Nordkvist	peter@supramed.se	Sweden	Journal article		2017-07-12	not stated	To assess the performance of the active (bimodulator) patch relative to placebo on the change of tinnitus symptoms after 21 days.	Intervention studies		"Randomized, Placebo-Controlled, Double-Blind, Parallel Groups Study"	Questionnaire		Closed	0	Visual Analogue Scale (VAS)	Patient-reported numerical rating scales tinnitus annoyance		82	Patients		secondary care services	53.5 treatment; 57.6 placebo	11.07 treatment; 12.10 placebo	not stated	Male and Female	13 yrs	not stated	not stated	not stated	N/A	none stated	Visual Analogue Scale (VAS)	Patient-reported numerical rating scales tinnitus annoyance			tinnitus annoyance	Annoyance	"For both active and placebo groups, the mean tinnitus annoyance (VAS) decreased (improved) from baseline to week 7"	N/A	N/A	N/A	N/A
																						Visual Analogue Scale (VAS)	Patient-reported numerical rating scales tinnitus-related symptoms																Visual Analogue Scale (VAS)	Patient-reported numerical rating scales tinnitus-related symptoms			Symptoms	cannot code
																						Visual Analogue Scale (VAS)		Patient-reported numerical rating scales hyperacusis
																						Questionnaire on well-being		Questionnaire on well-being
84	2	1	2	2	7	Randomised controlled trial in clinical settings to evaluate effectiveness of coping skills education used with Progressive Tinnitus Management	James A. Henry, Emily J. Thielman, Tara L. Zaugg, Christine Kaelin, Caroline J. Schmidt, Susan Griest, Garnett P. McMillan, Paula Myers, Izel Rivera, Robert Baldwin, and Kathleen Carlson	james.henry@va.gov	USA	Journal article		2017	January 2011-January 2014	To determine the effectiveness pf PTM when performed in a clincal setting by VA audiologists and psychologists.	Intervention studies		"2-site RCT"	Questionnaire		Closed	0	Tinnitus Handicap Inventory	Tinnitus Handicap Inventory		297	Patients		secondary care services	58	13	24-90	Male and Female	broken down into categories	not stated	not stated	THI 52 (24)	Moderate	none stated	Tinnitus Handicap Inventory	Tinnitus Handicap Inventory						N/A	N/A	N/A	N/A
																						Tinnitus Functional Index	Tinnitus Functional Index																Tinnitus Functional Index	Tinnitus Functional Index
																						Tinnitus Baseline questionnaire (authors own)	Author's own																Tinnitus Baseline questionnaire (authors own)	Author's own
																						Self-efficacy for managing reactions to tinnitus (authors own)	Author's own																Self-efficacy for managing reactions to tinnitus (authors own)	Author's own
																						Control of my reactions to tinnitus	Patient-reported numerical rating scales control																Control of my reactions to tinnitus	Patient-reported numerical rating scales control
																						Ability to cope with tinnitus	Patient-reported numerical rating scales general coping ability																Ability to cope with tinnitus	Patient-reported numerical rating scales general coping ability
																						Quality of life		Quality of life															Quality of life	Quality of life			Quality of life	Health-related quality of life	Examining subjective reports of improvement for PTM participants 66.7% felt that their quality of life was better (a little better, somewhat better, or a lot better) since participating in the workshops
																						Degree of bothersome tinnitus	Patient-reported numerical rating scales annoyance																Degree of bothersome tinnitus	Patient-reported numerical rating scales annoyance			Tinnitus Annoyance	Annoyance	Examining subjective reports of improvement for PTM participants, 62.7% felt that their tinnitus bothered them less (a little less, somewhat less, or a lot less)
																						Hearing Handicap Inventory for the Elderly (10-item)		Hearing Handicap Inventory for the Elderly															Hearing Handicap Inventory for the Elderly (10-item)	Hearing Handicap Inventory for the Elderly
[truncated: 2 more columns]
